# Supplementary material for: Vinylic amino group activation: a new and general strategy leading to functionalized fused heteroaromatics
Source: Royal Society of Chemistry journal article supplement (doi:10.1039/c3cc41337c), 2013-01-01
Supplement: c3cc41337c.pdf [file c3cc41337c.pdf]

Copies of  $^1\text{H}$  and  $^{13}\text{C}$  NMR spectra

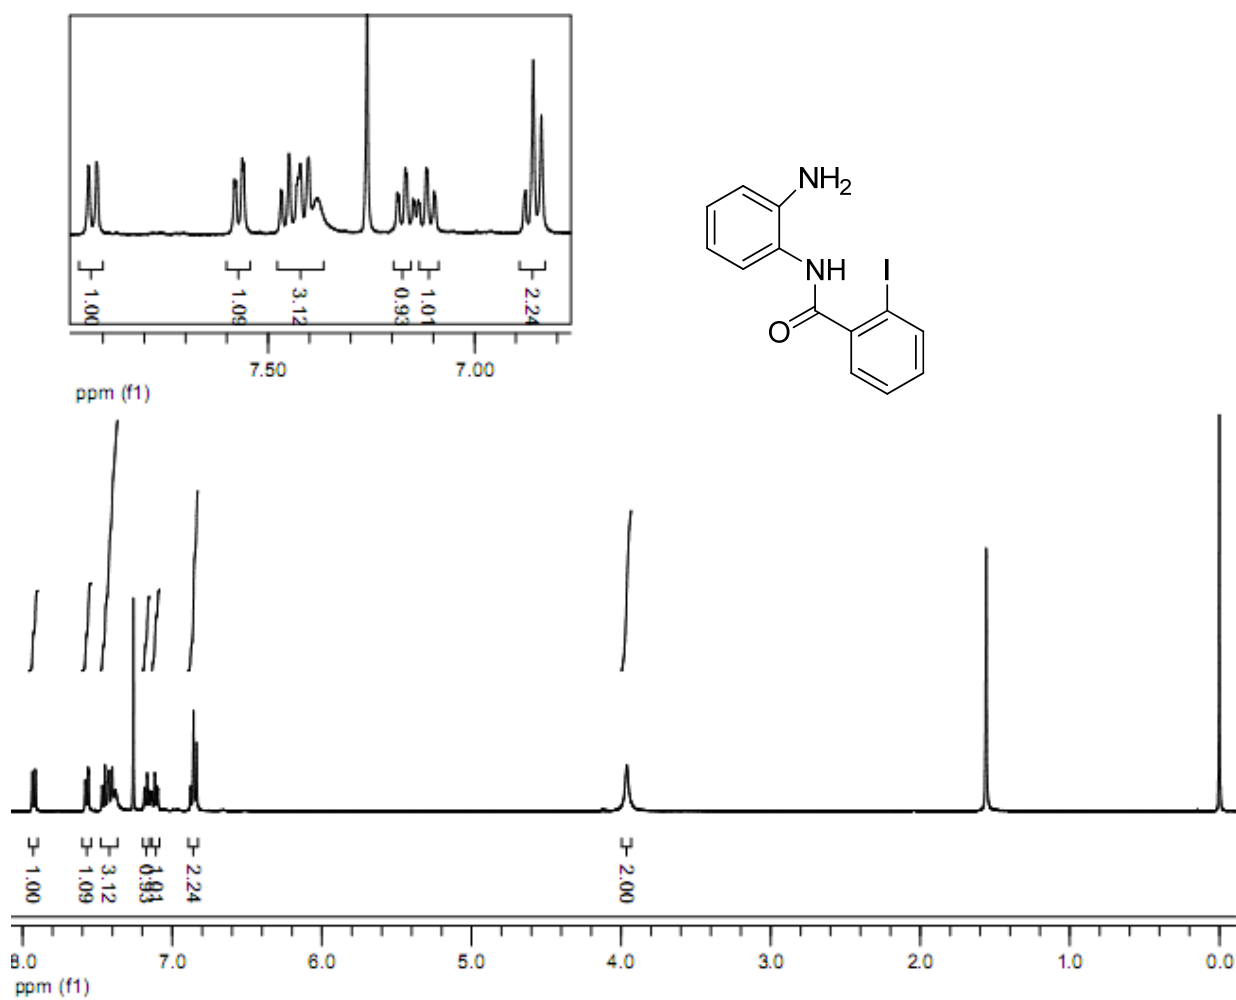

Fig. 1:  $^1\text{H}$  NMR spectra of compound **1a** ( $\text{CDCl}_3$ , 400 MHz)

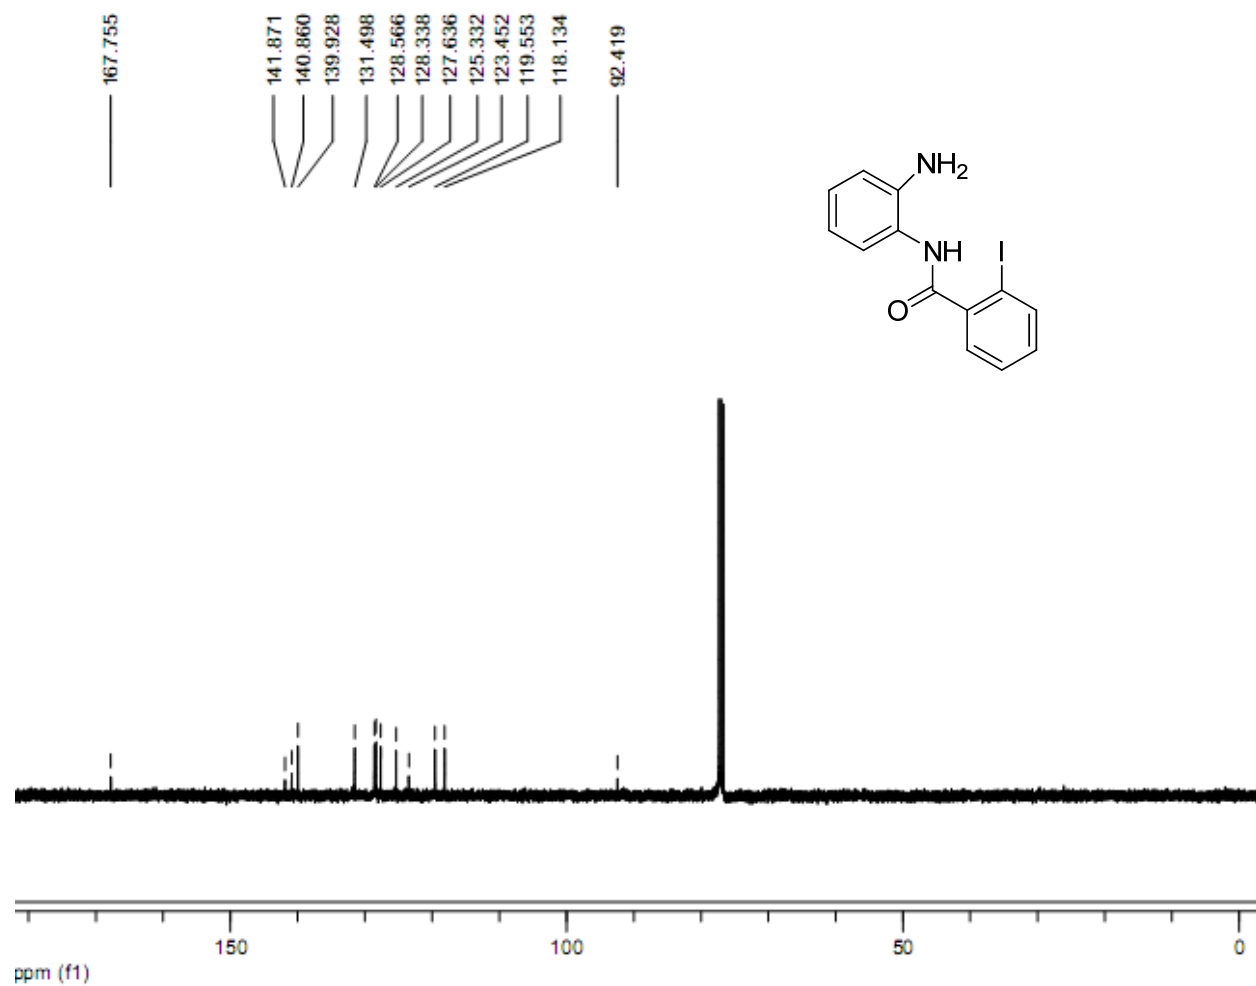

Fig. 2:  $^{13}\text{C}$  NMR spectra of compound **1a** ( $\text{CDCl}_3$ , 100 MHz)

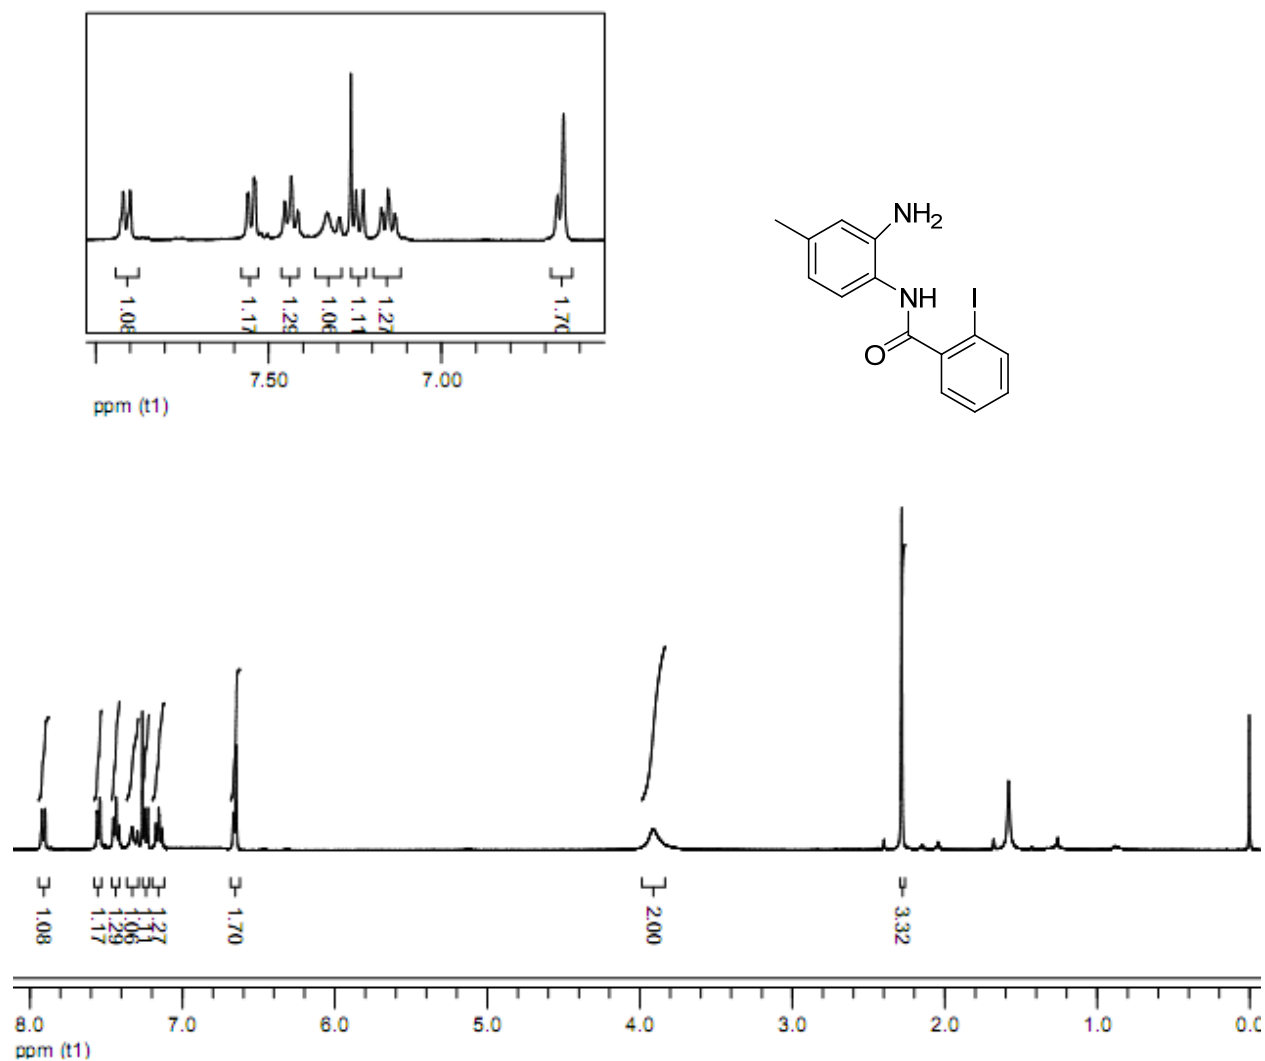

Fig. 3: <sup>1</sup>H NMR spectra of compound **1b** (CDCl<sub>3</sub>, 400 MHz)

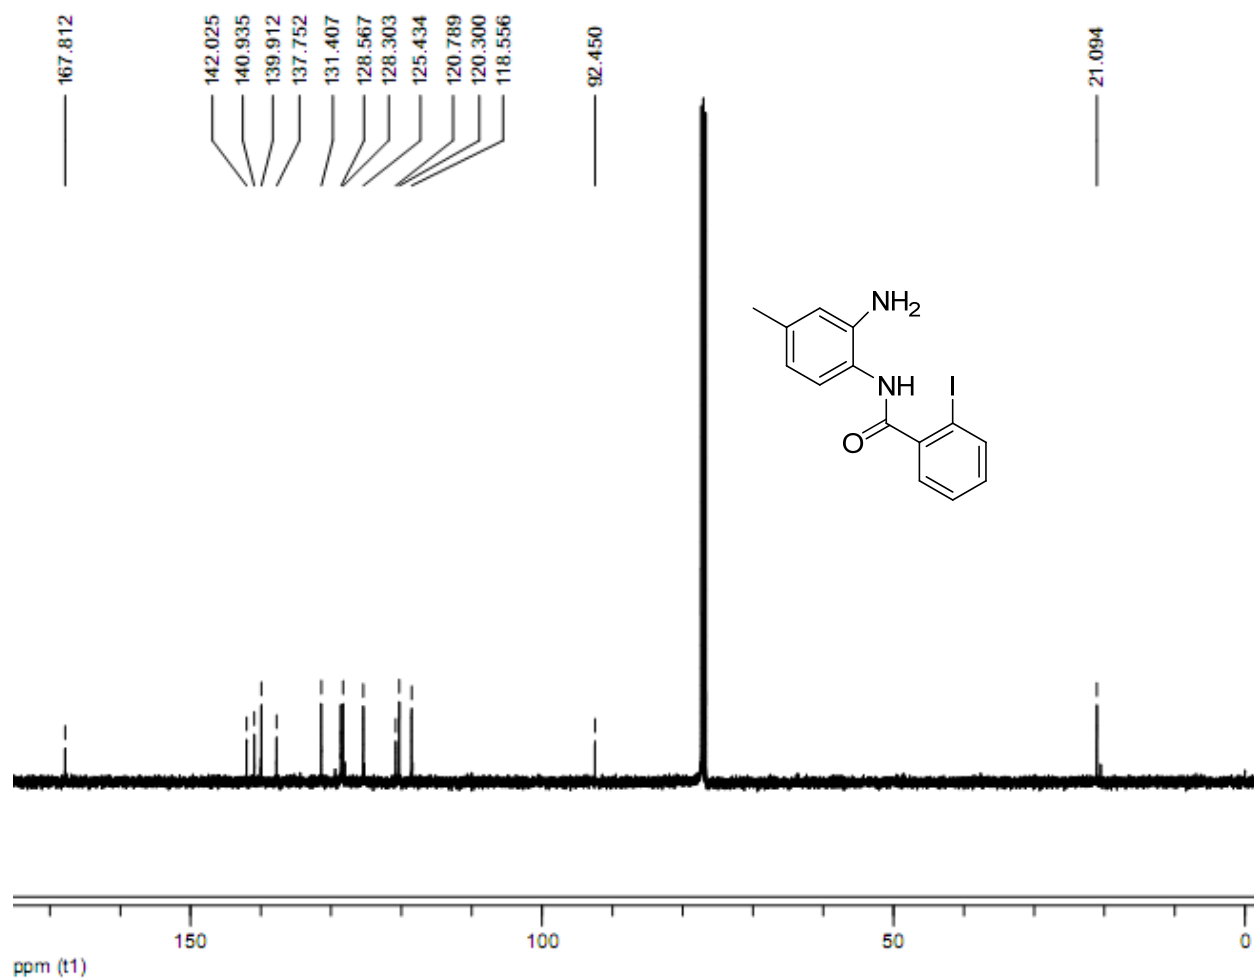

Fig.4: <sup>13</sup>C NMR spectra of compound **1b** (CDCl<sub>3</sub>, 100 MHz)

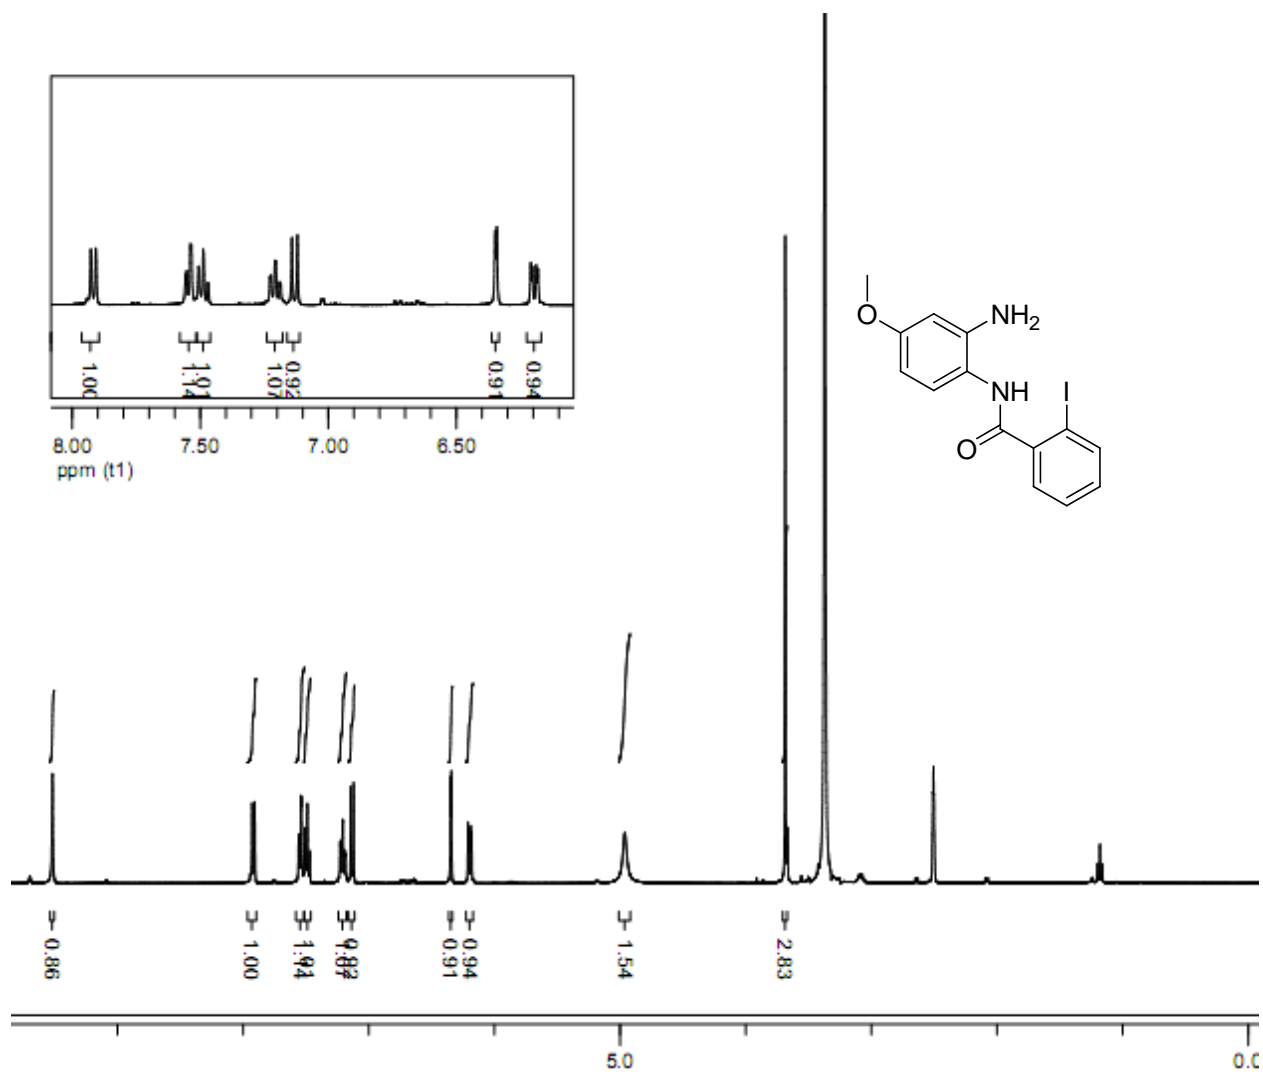

Fig. 5:  $^1\text{H}$  NMR spectra of compound **1c** ( $\text{DMSO-}d_6$ , 400 MHz)

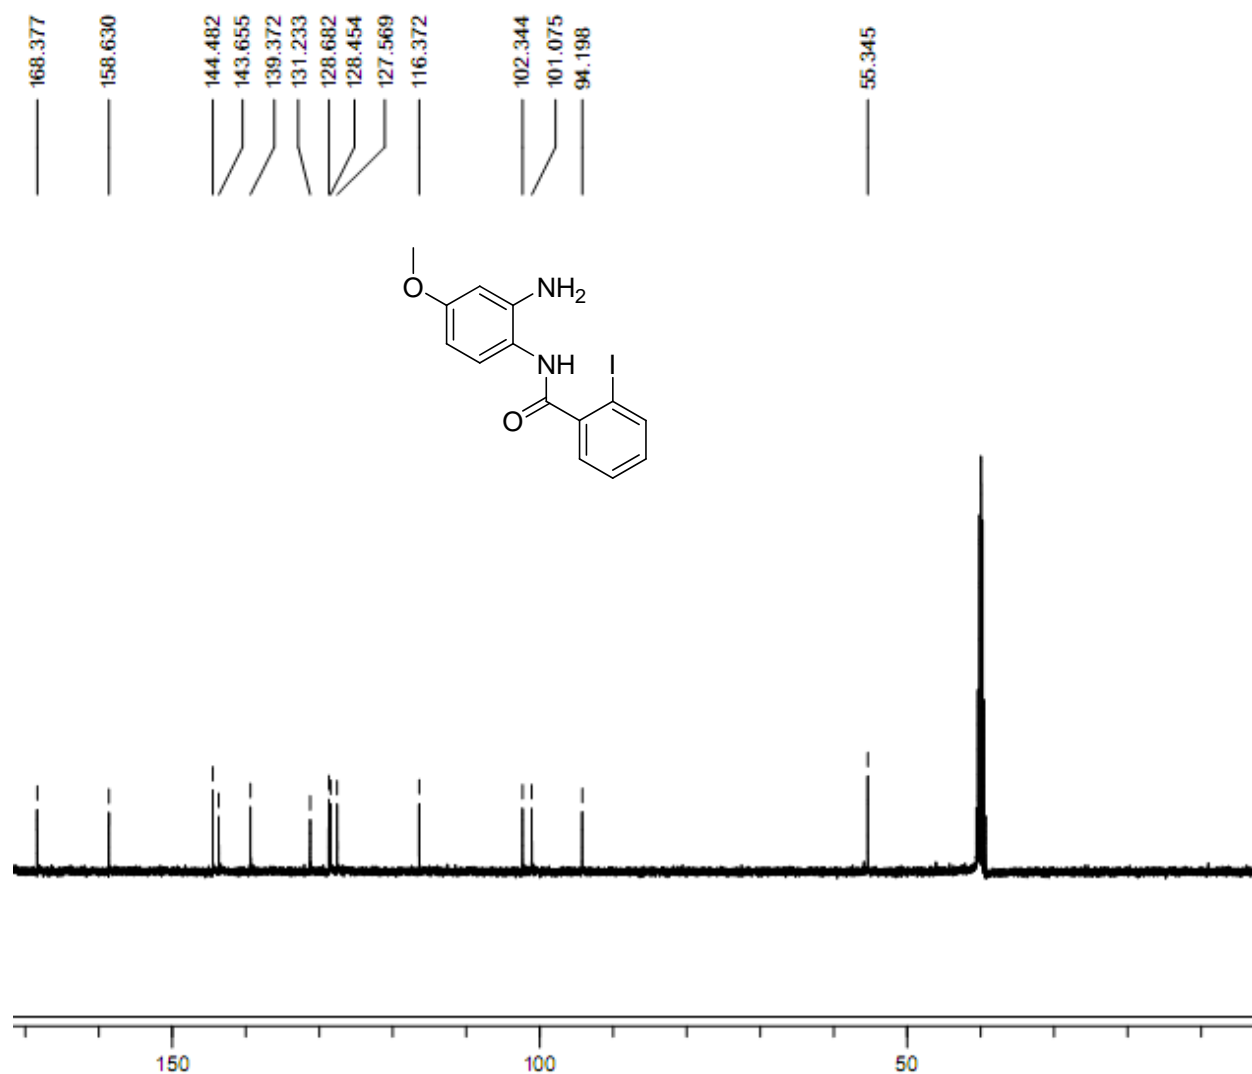

Fig.6: <sup>13</sup>C NMR spectra of compound **1c** (DMSO-*d*<sub>6</sub>, 100 MHz)

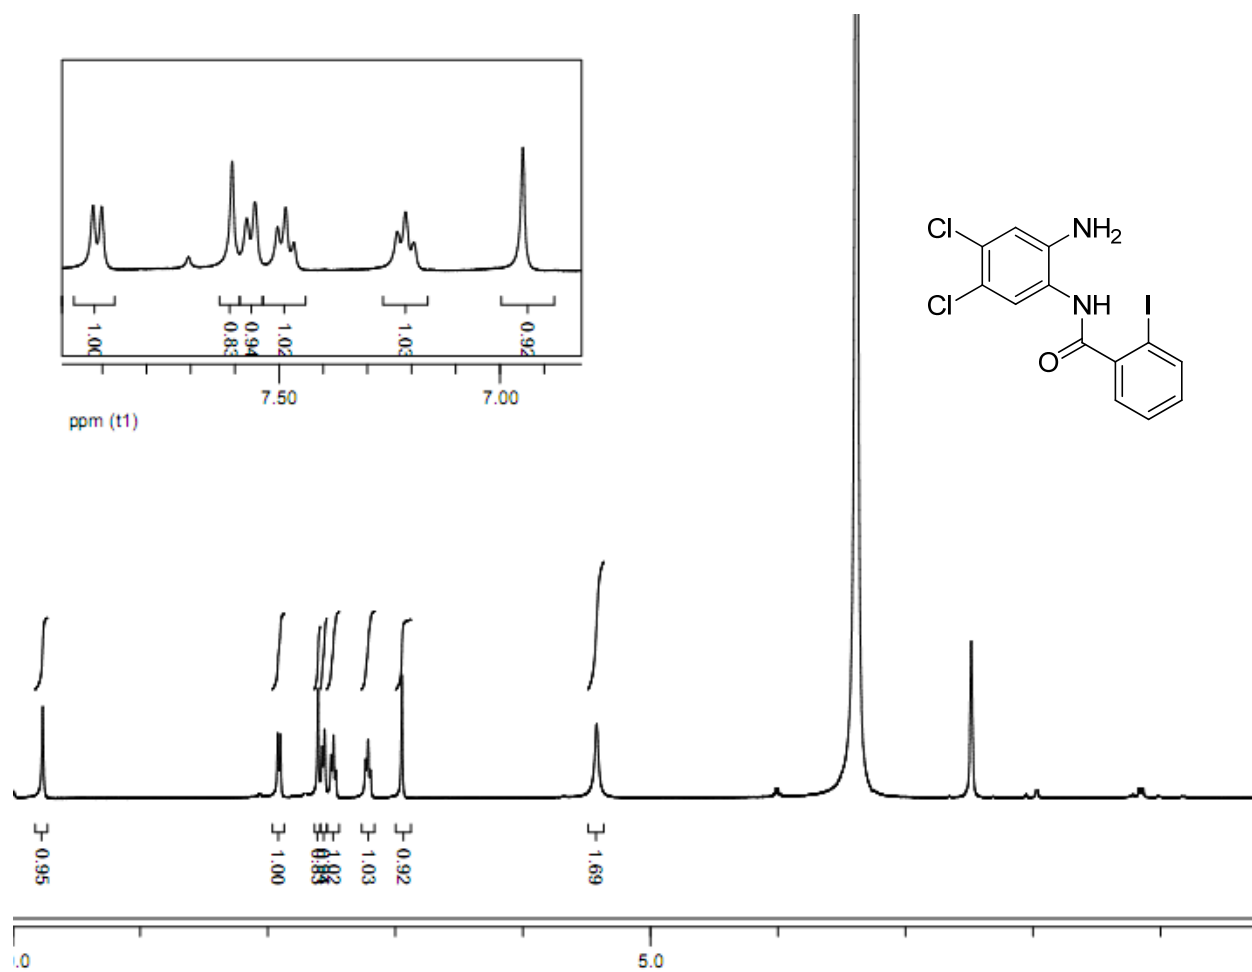

Fig. 7:  $^1\text{H}$  NMR spectra of compound **1d** ( $\text{DMSO}-d_6$ , 400 MHz)

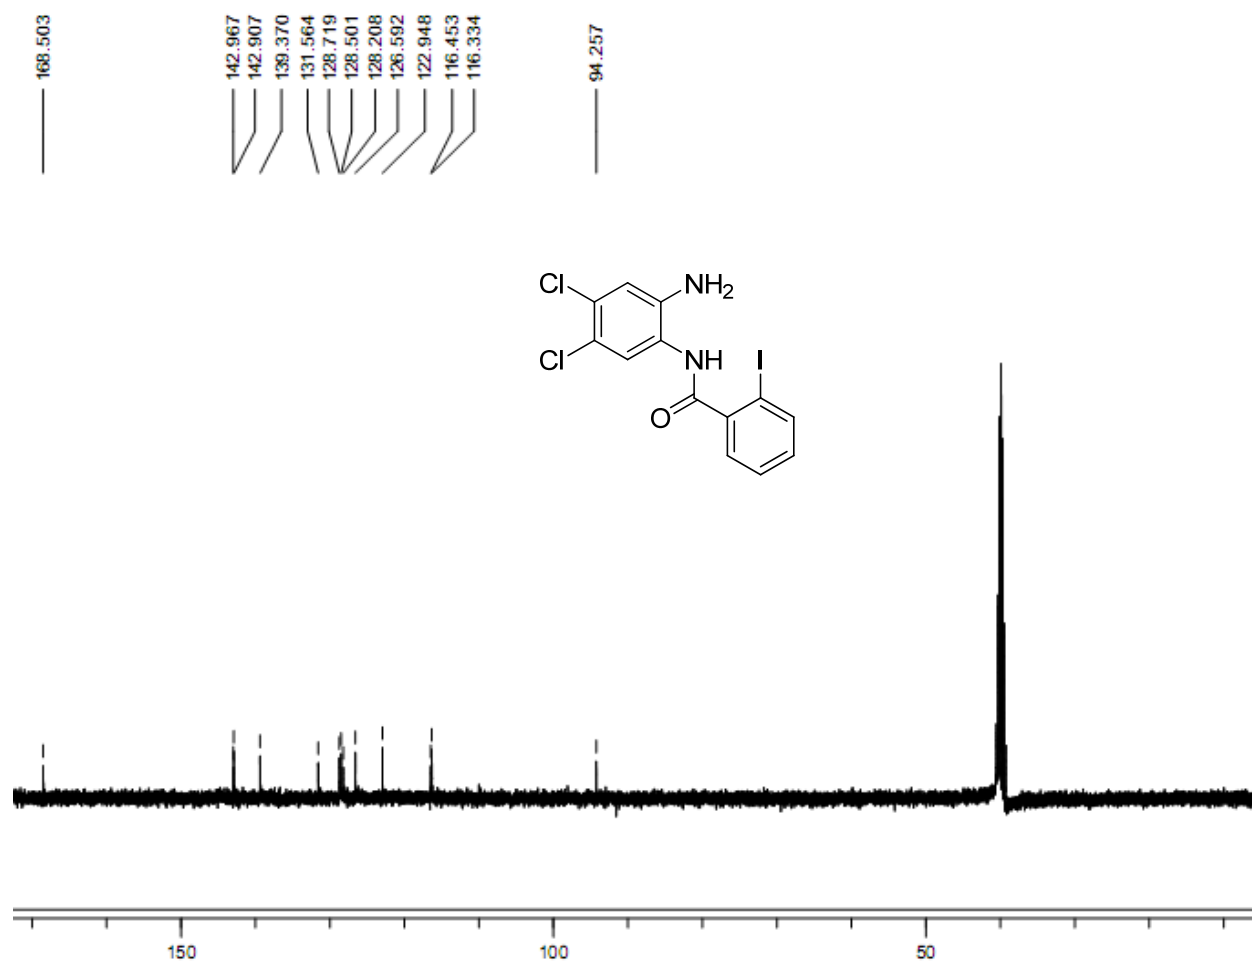

Fig.8: <sup>13</sup>C NMR spectra of compound **1d** (DMSO-*d*<sub>6</sub>, 100 MHz)



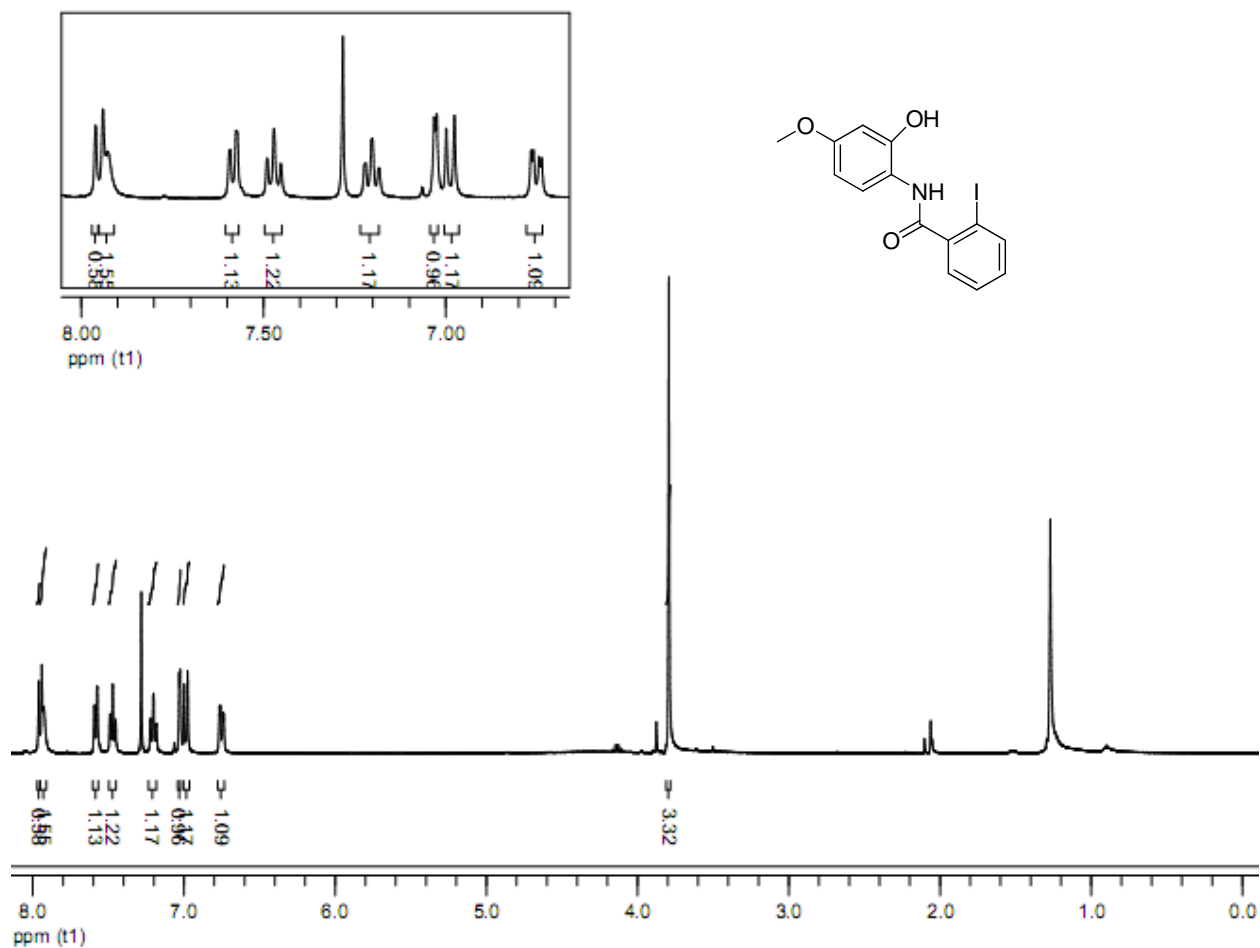

Fig. 9:  $^1\text{H}$  NMR spectra of compound **1e** ( $\text{CDCl}_3$ , 400 MHz)

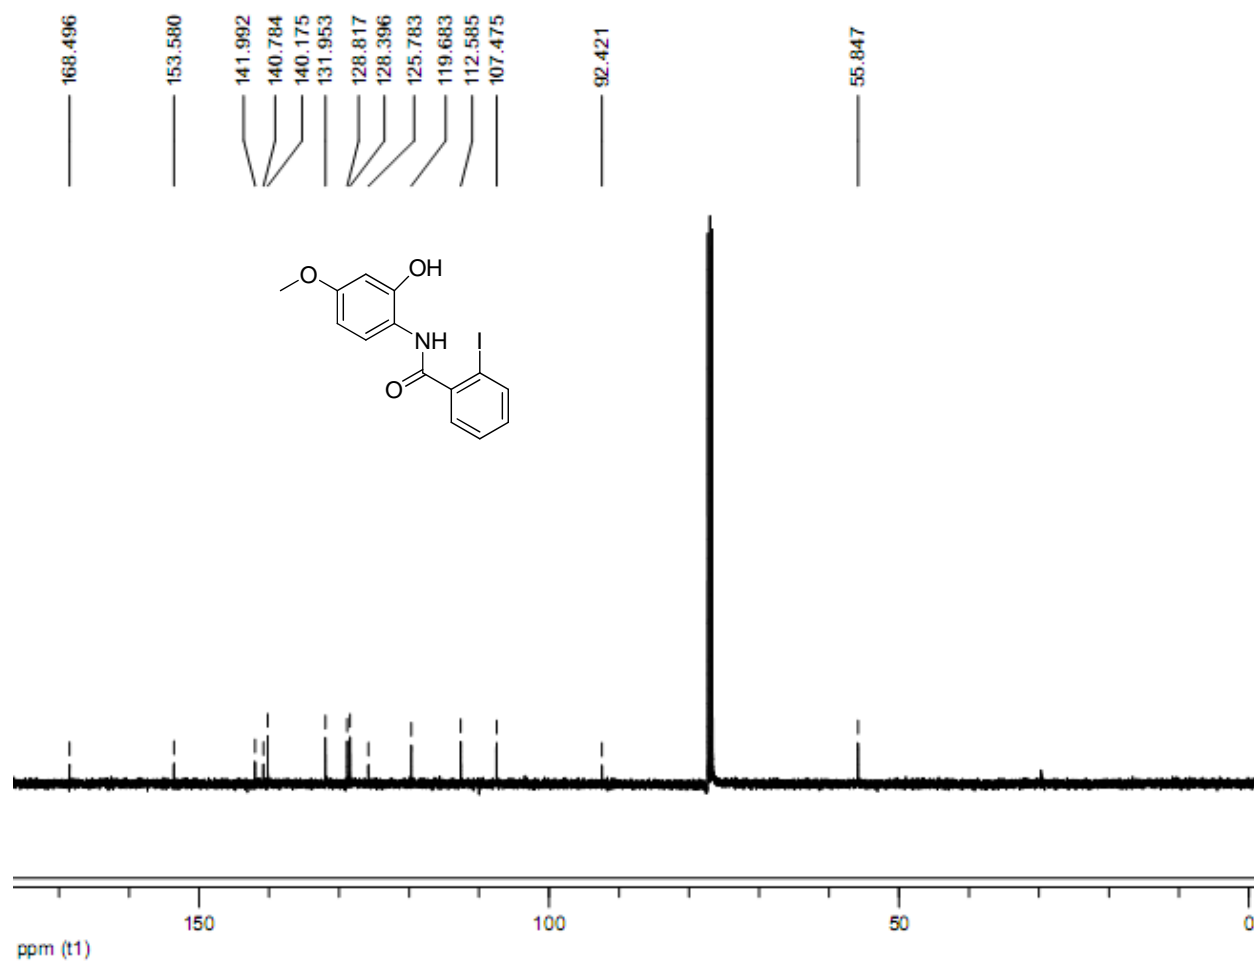

Fig.10: <sup>13</sup>C NMR spectra of compound **1e** (CDCl<sub>3</sub>, 100 MHz)

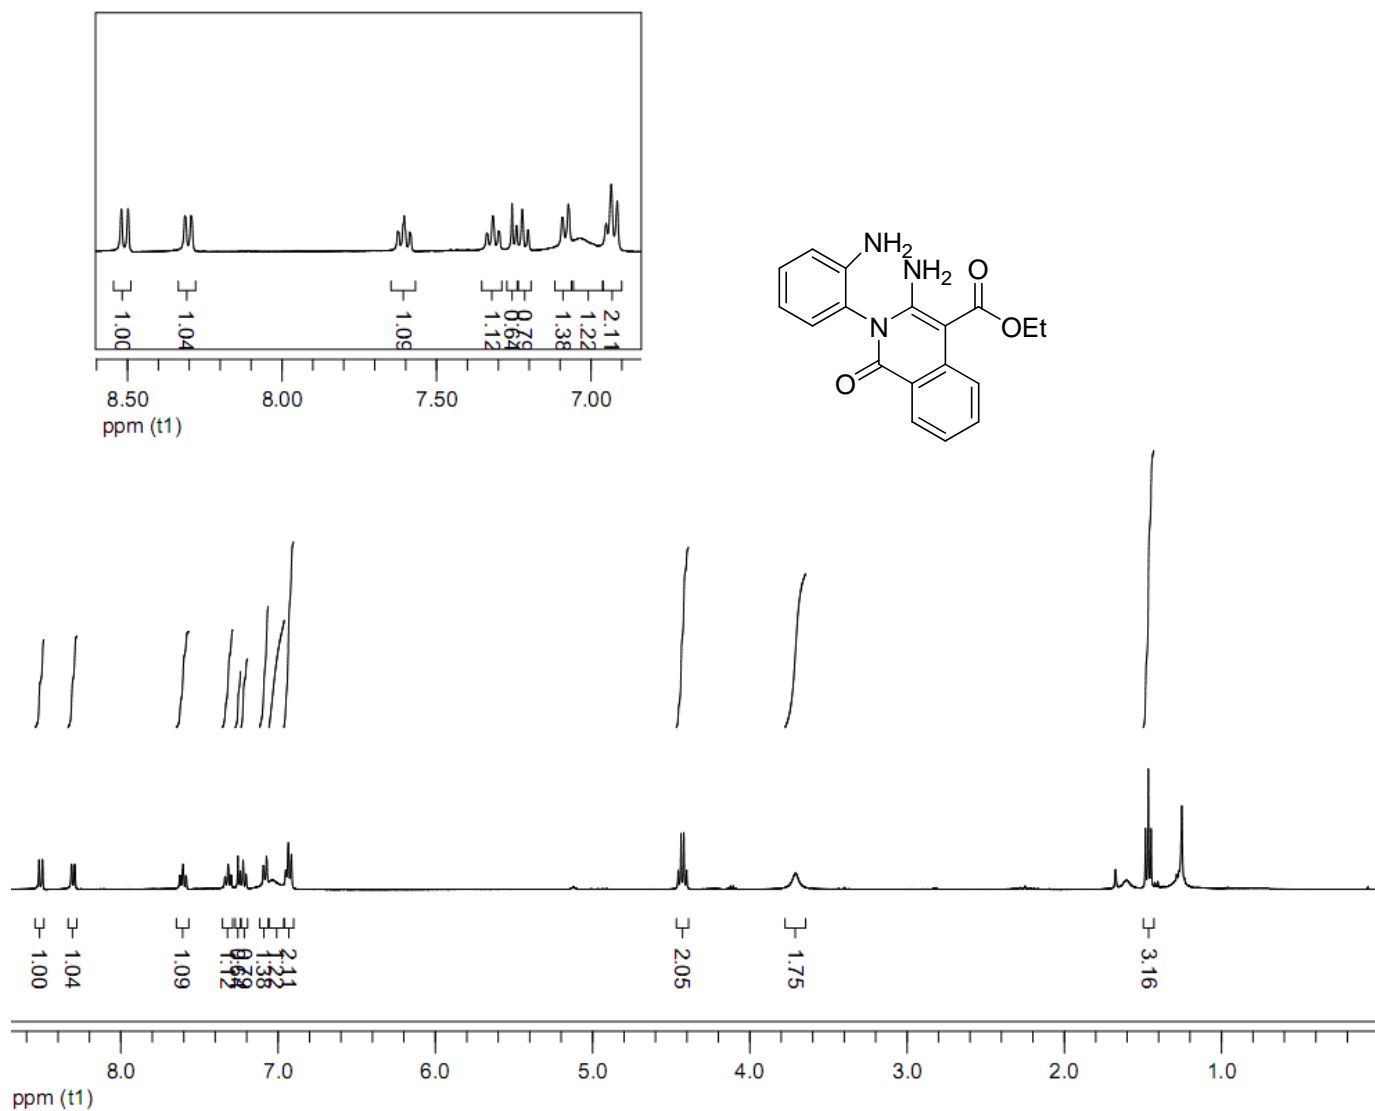

Fig. 11:  $^1\text{H}$  NMR spectra of compound **3a** ( $\text{CDCl}_3$ , 400 MHz)

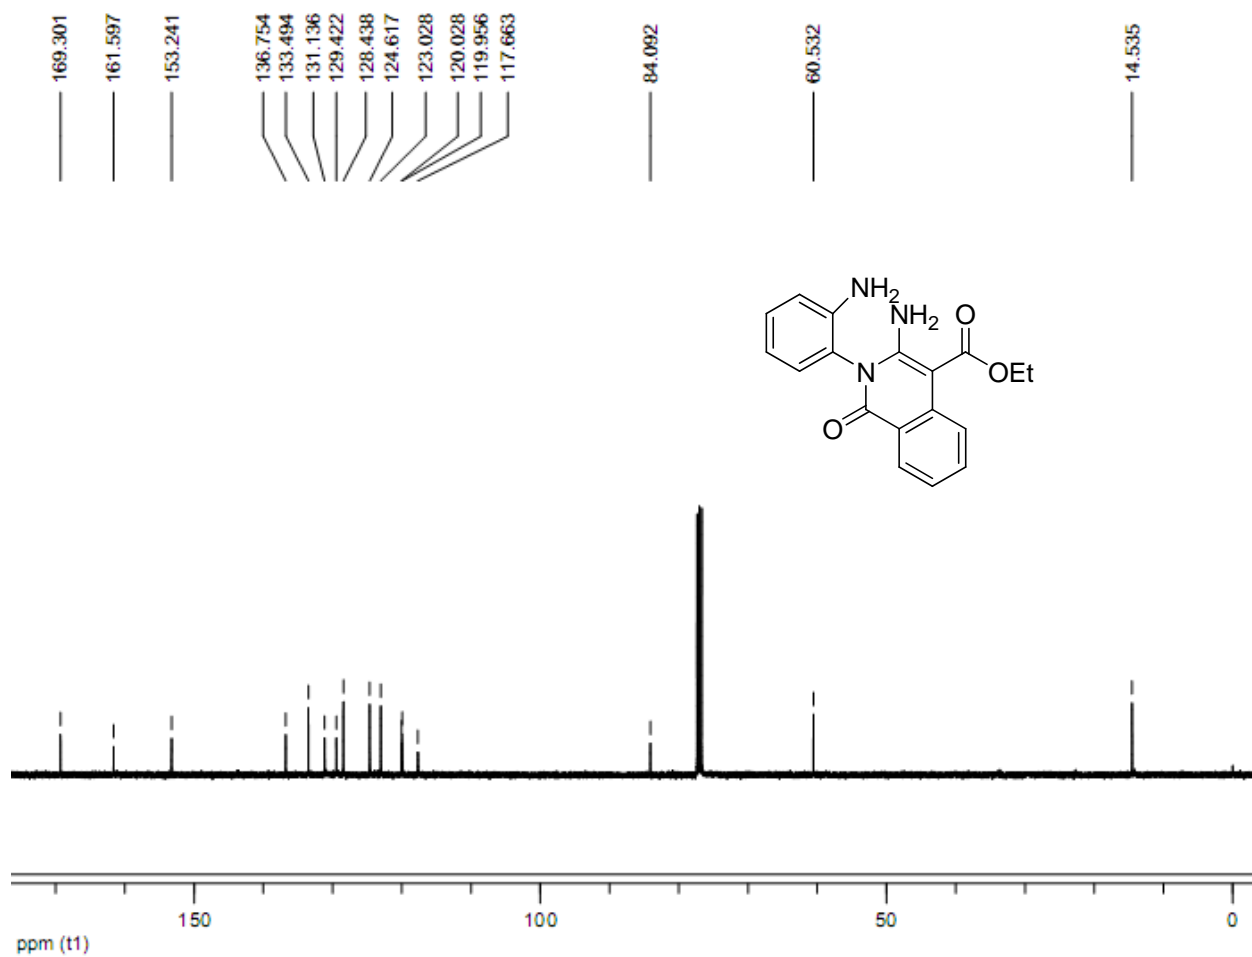

Fig. 12: <sup>13</sup>C NMR spectra of compound **3a** (CDCl<sub>3</sub>, 100 MHz)

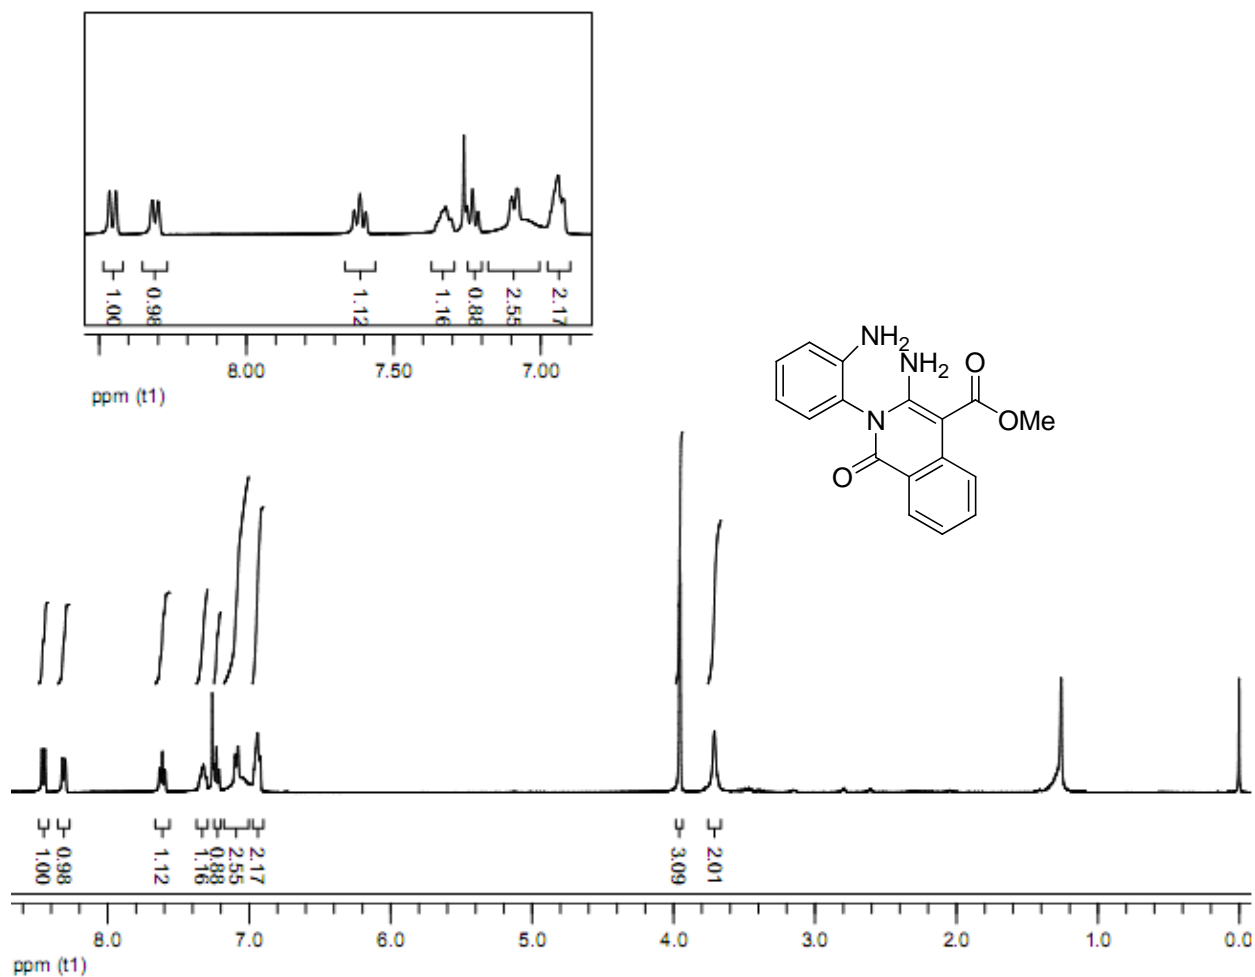

Fig. 13:  $^1\text{H}$  NMR spectra of compound **3b** ( $\text{CDCl}_3$ , 400 MHz)

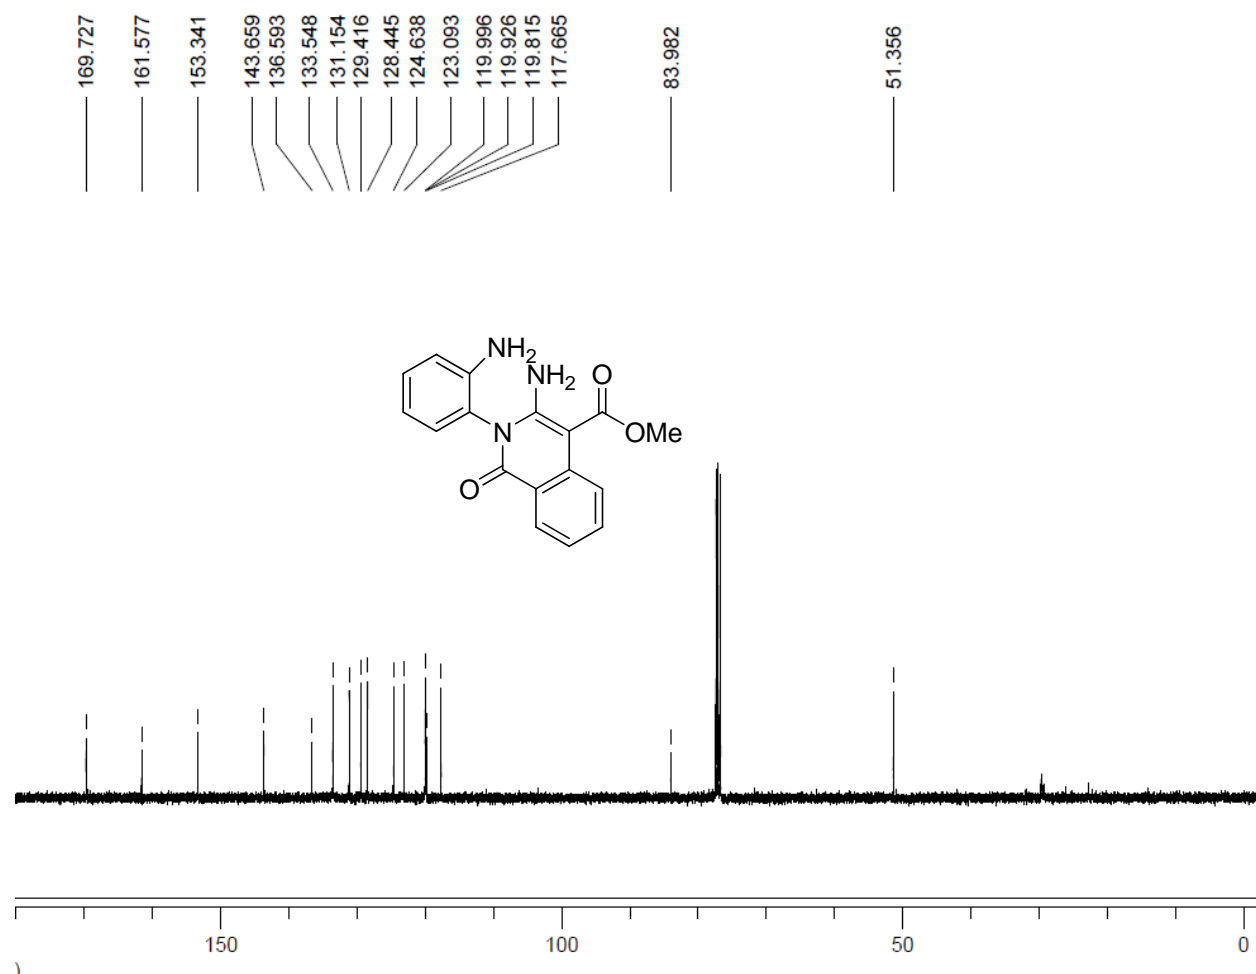

Fig. 14: <sup>13</sup>C NMR spectra of compound **3b** (CDCl<sub>3</sub>, 100 MHz)

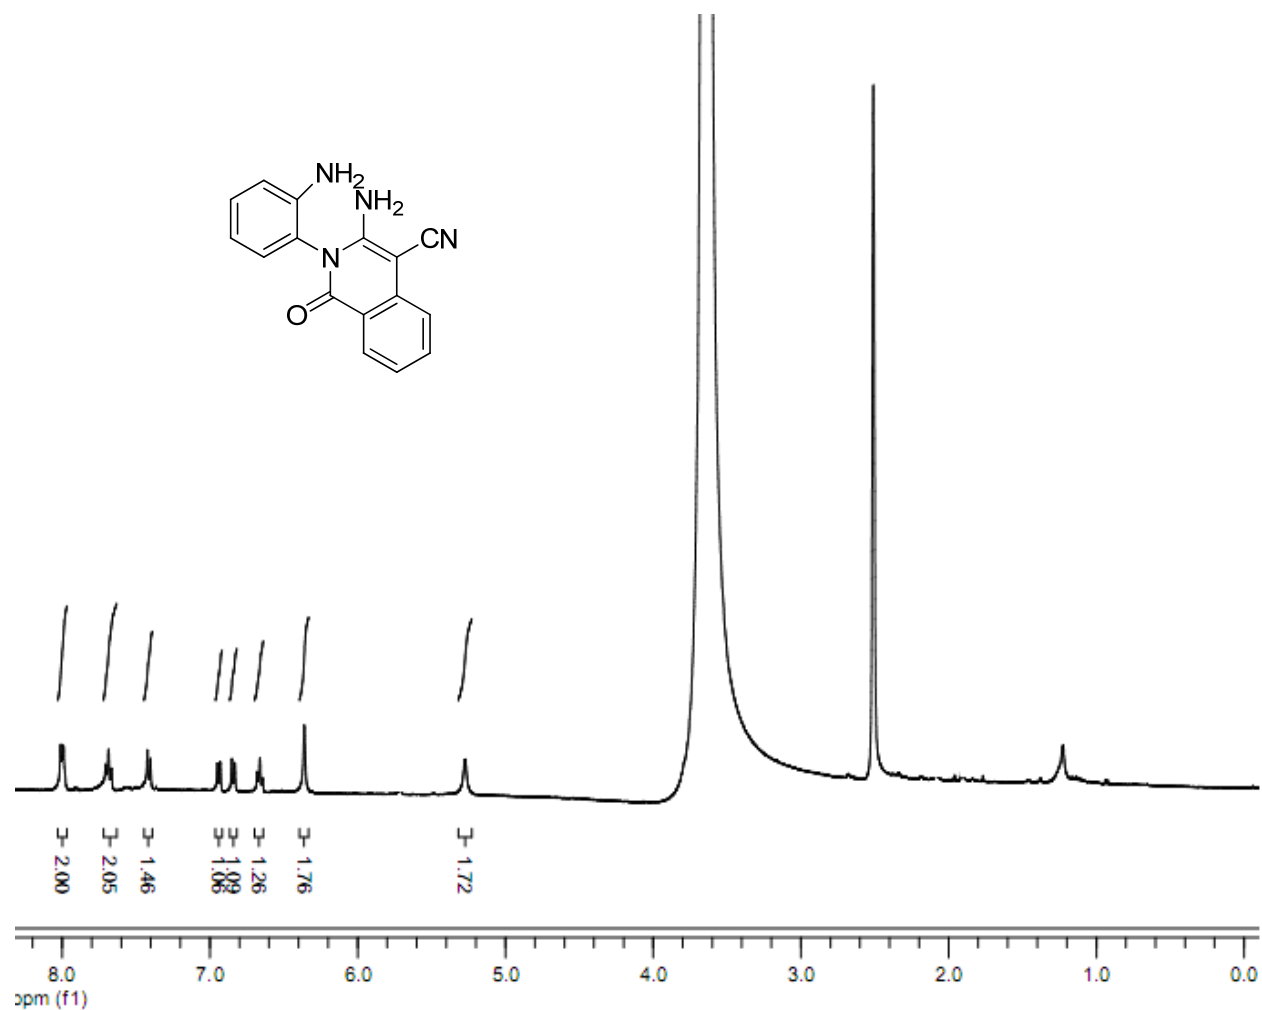

Fig. 15: <sup>1</sup>H NMR spectra of compound **3c** (DMSO-*d*<sub>6</sub>, 400 MHz)

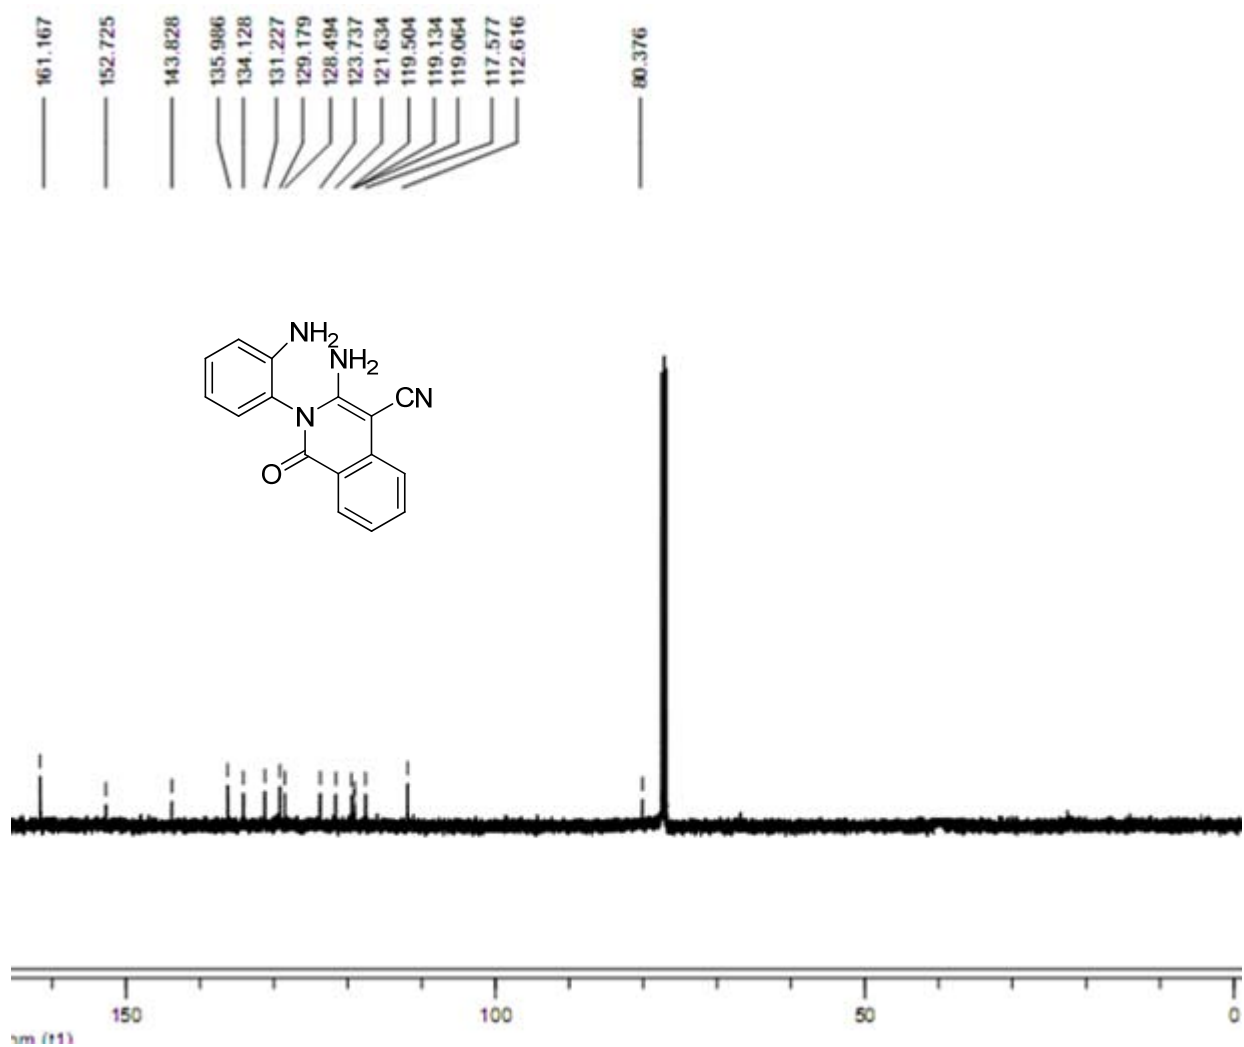

Fig. 16: <sup>13</sup>C NMR spectra of compound **3c** (DMSO-*d*<sub>6</sub>, 100 MHz)



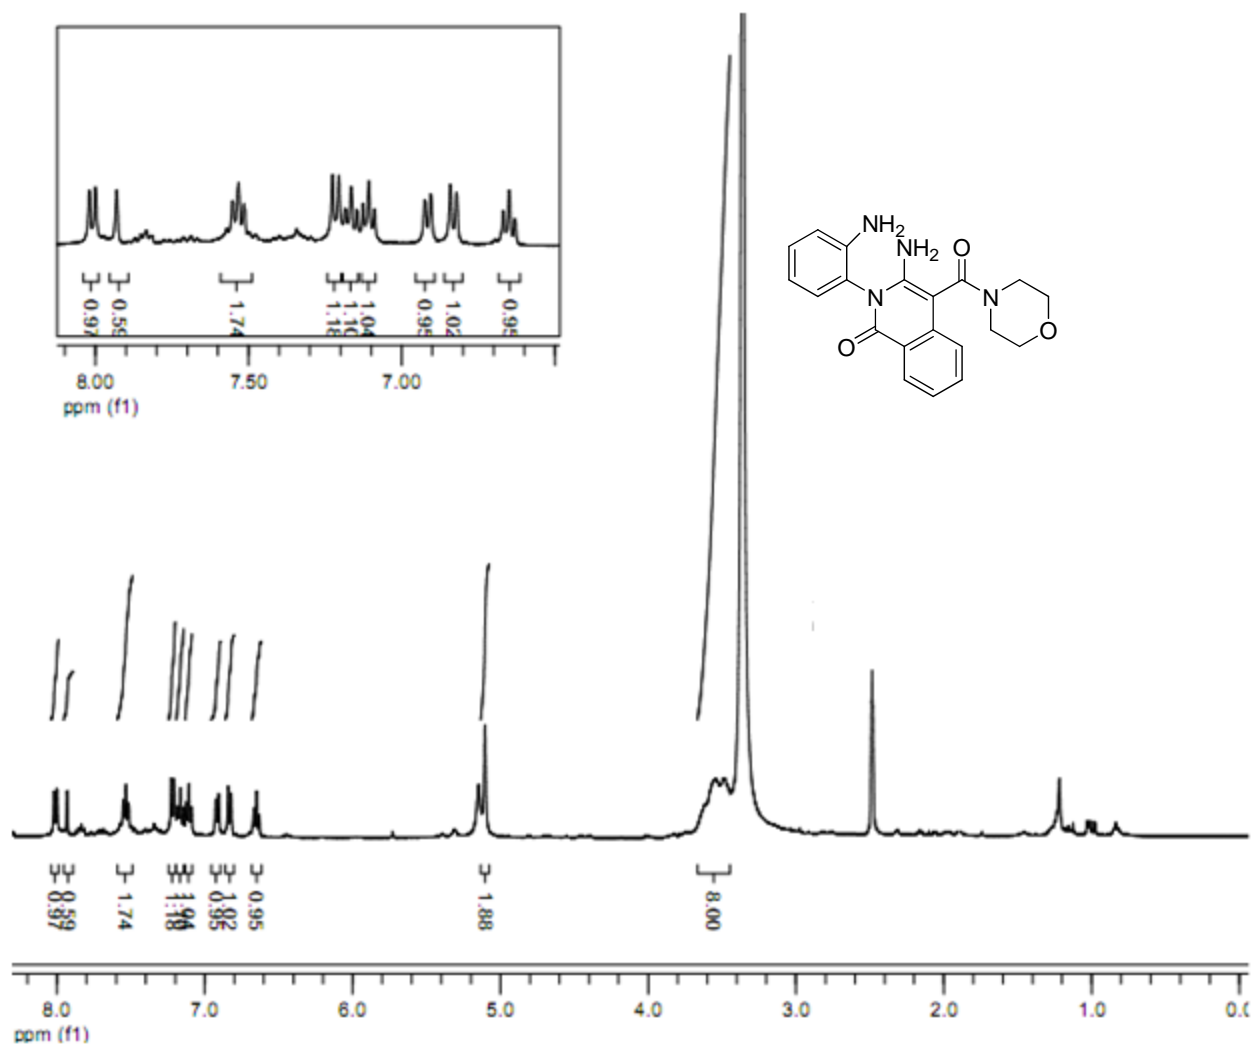

Fig. 17:  $^1\text{H}$  NMR spectra of compound **3d** ( $\text{DMSO}-d_6$ , 400 MHz)

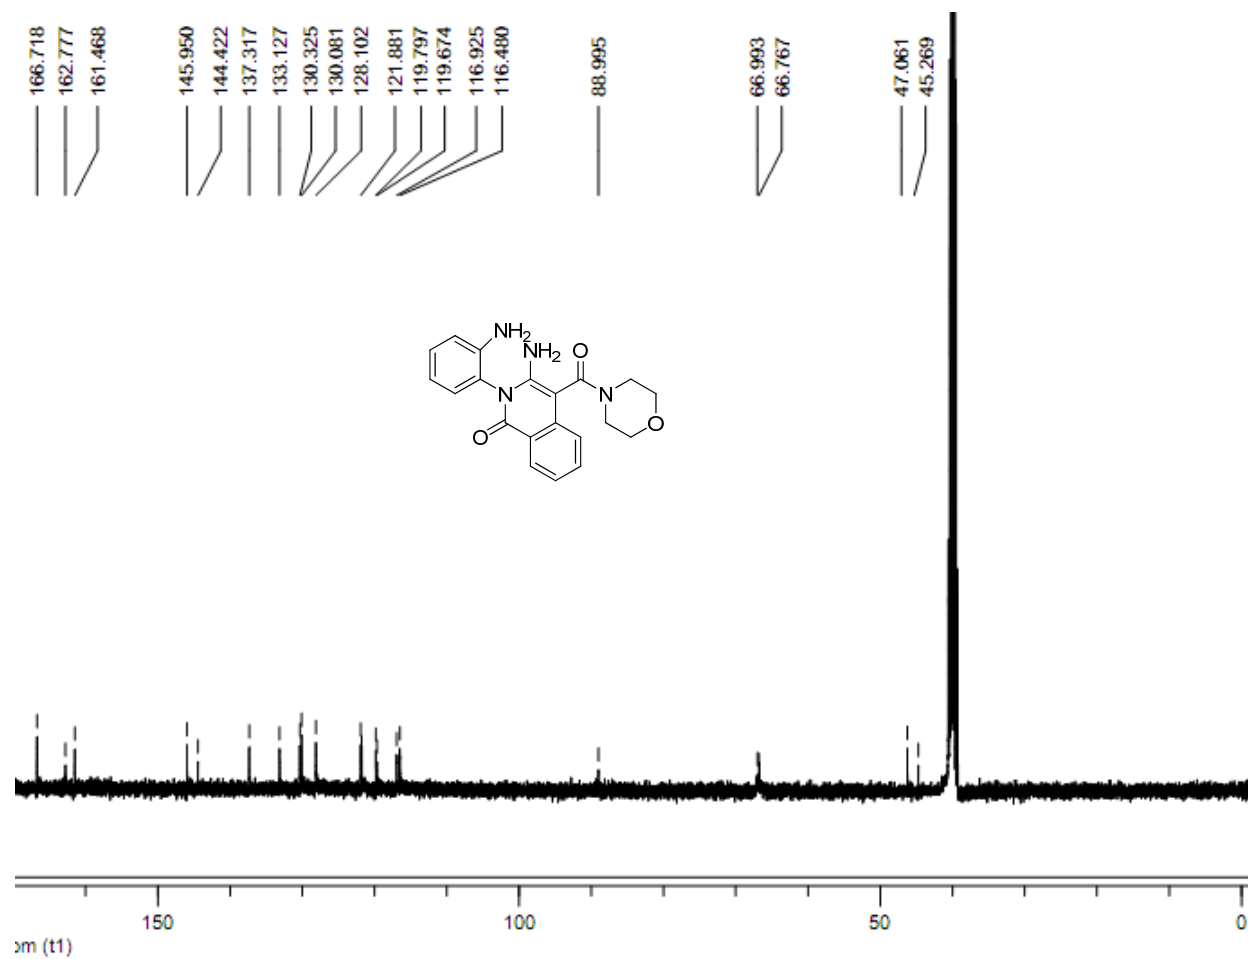

Fig. 18: <sup>13</sup>C NMR spectra of compound **3d** (DMSO-*d*<sub>6</sub>, 100 MHz)

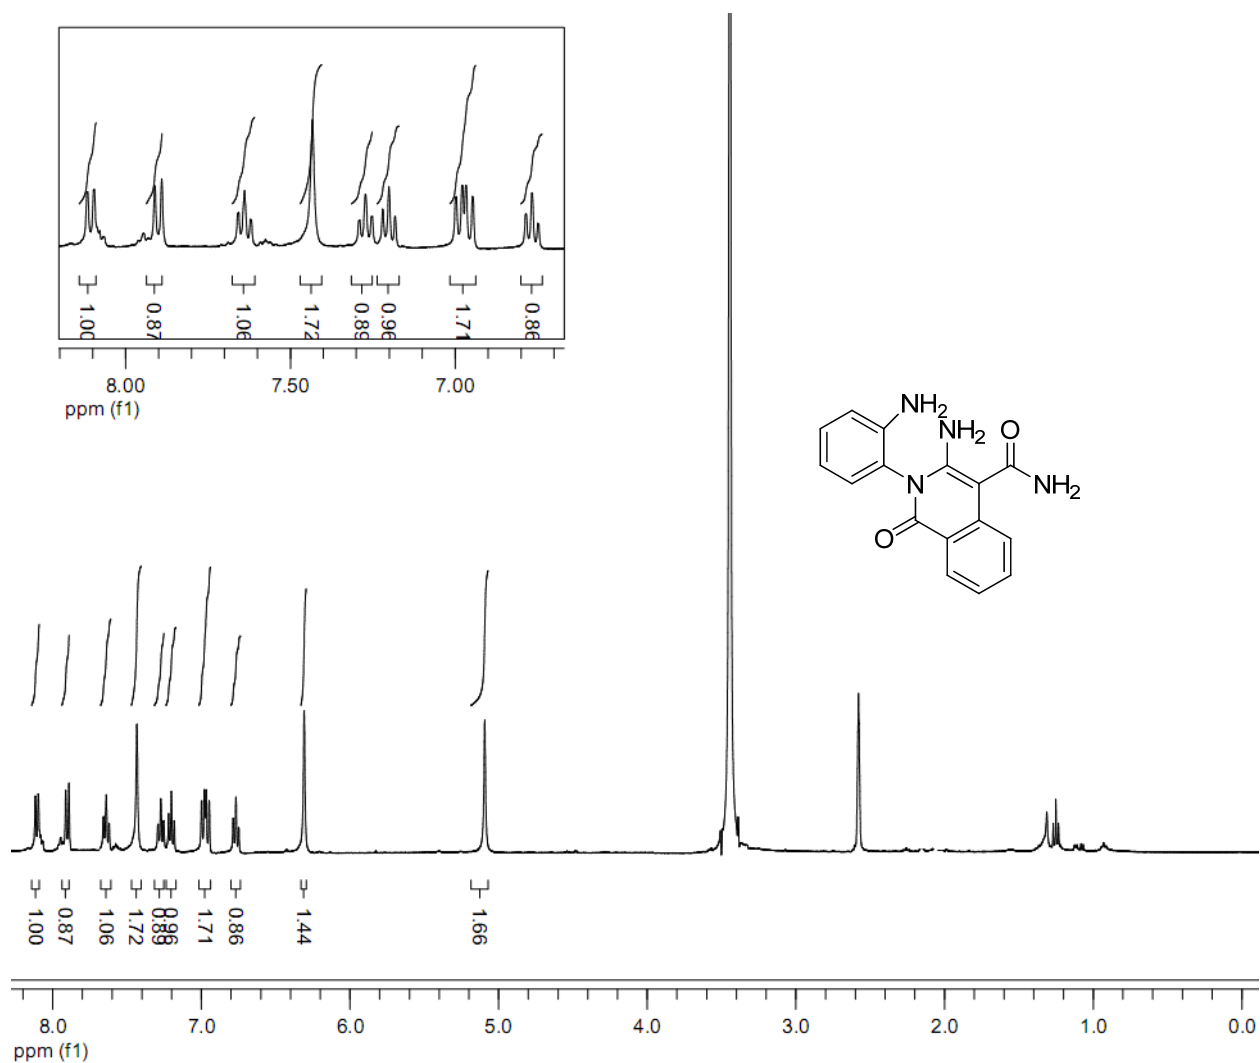

Fig. 19:  $^1\text{H}$  NMR spectra of compound **3e** ( $\text{DMSO-}d_6$ , 400 MHz)

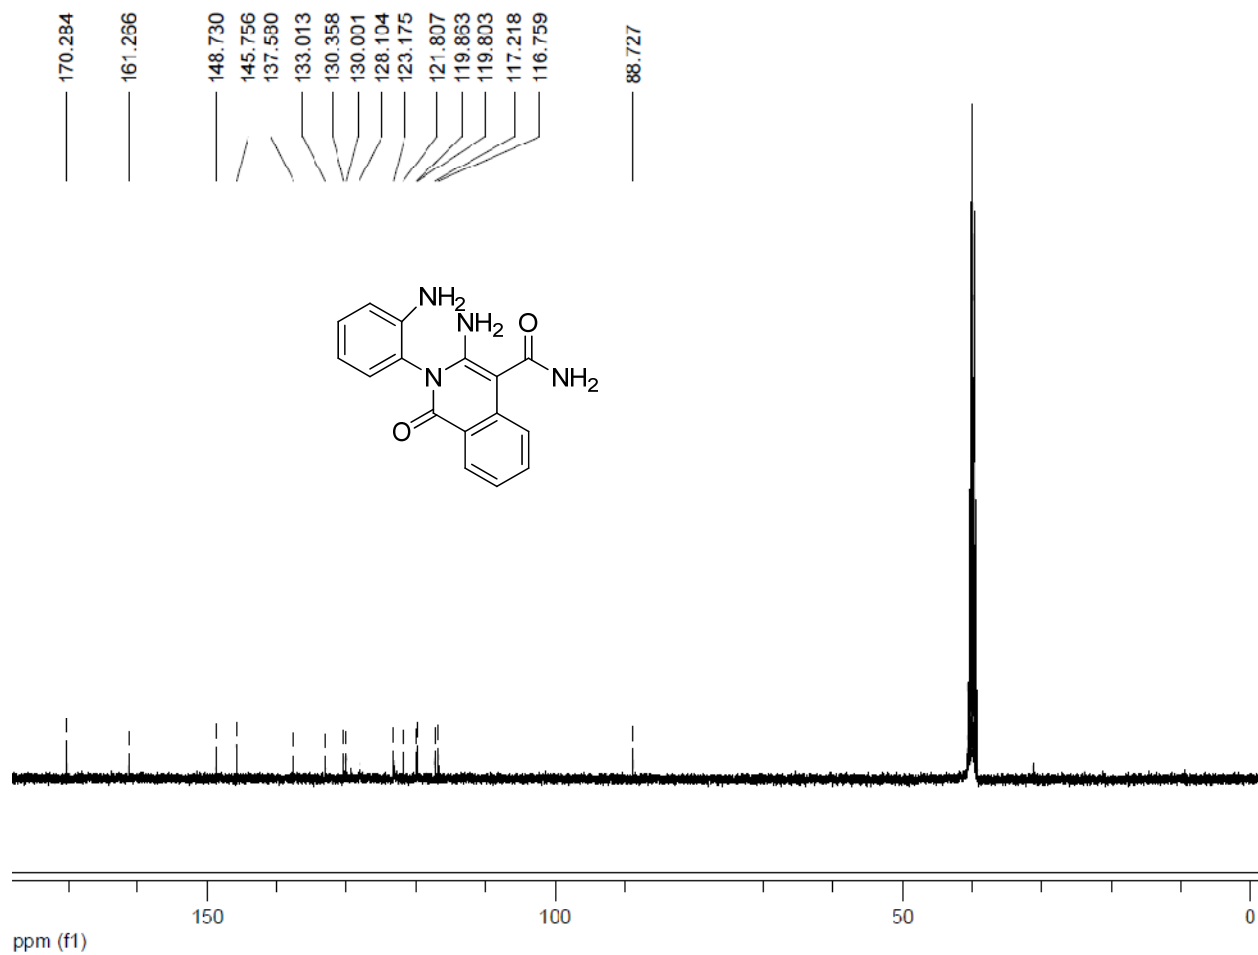

Fig. 20: <sup>13</sup>C NMR spectra of compound **3e** (DMSO-*d*<sub>6</sub>, 100 MHz)

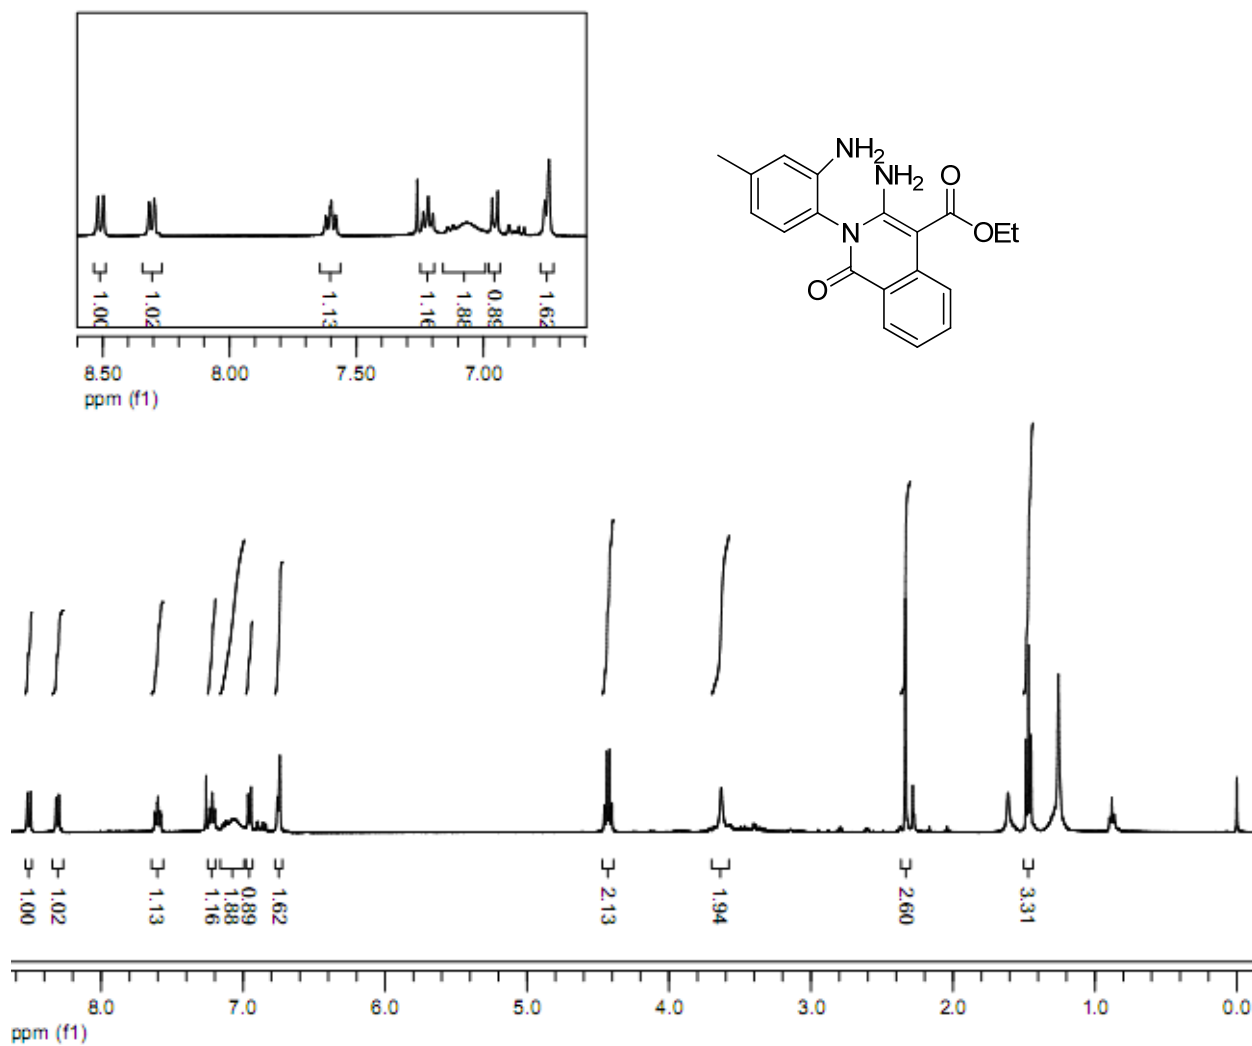

Fig. 21:  $^1\text{H}$  NMR spectra of compound **3f** ( $\text{CDCl}_3$ , 400 MHz)

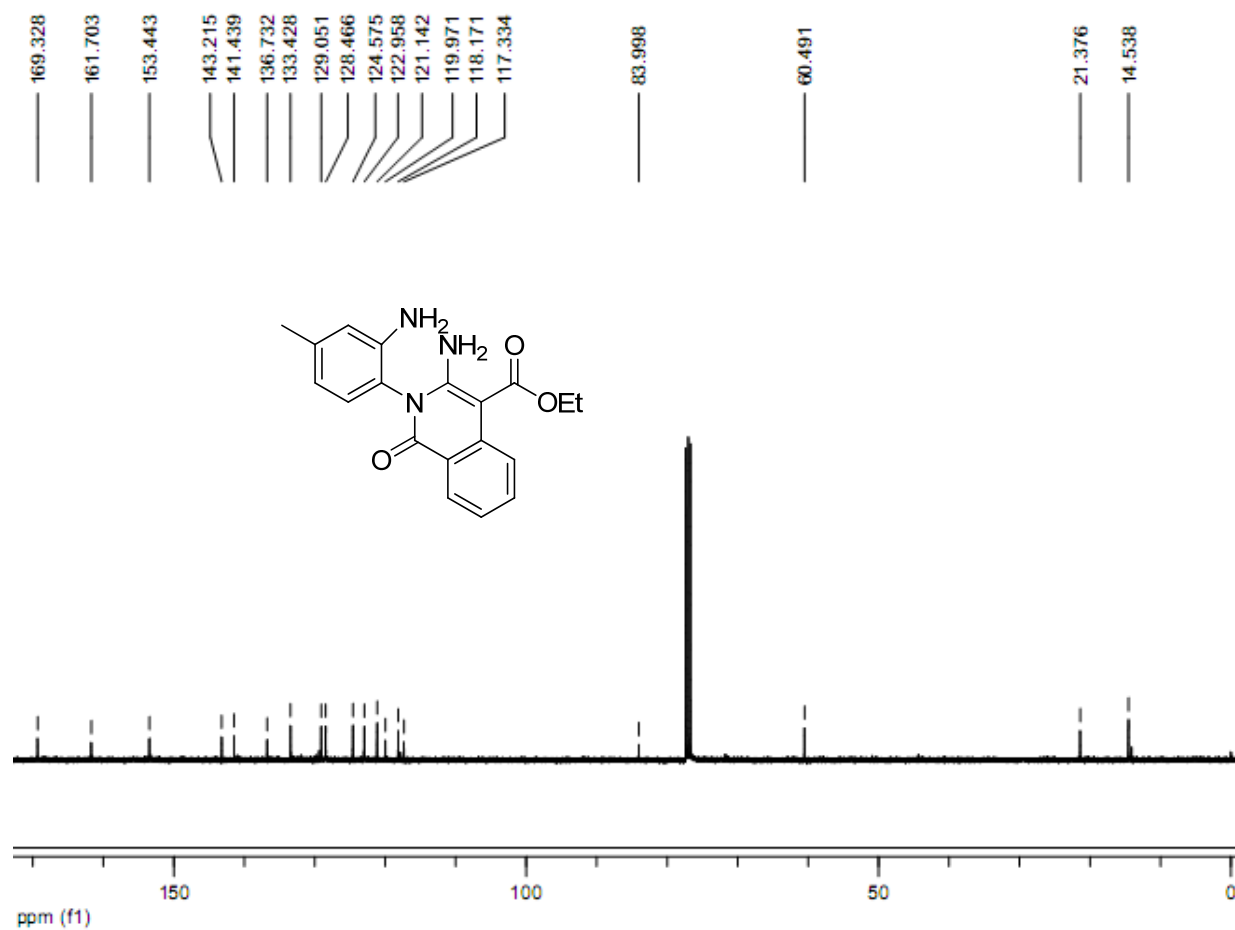

Fig. 22: <sup>13</sup>C NMR spectra of compound **3f** (CDCl<sub>3</sub>, 100 MHz)

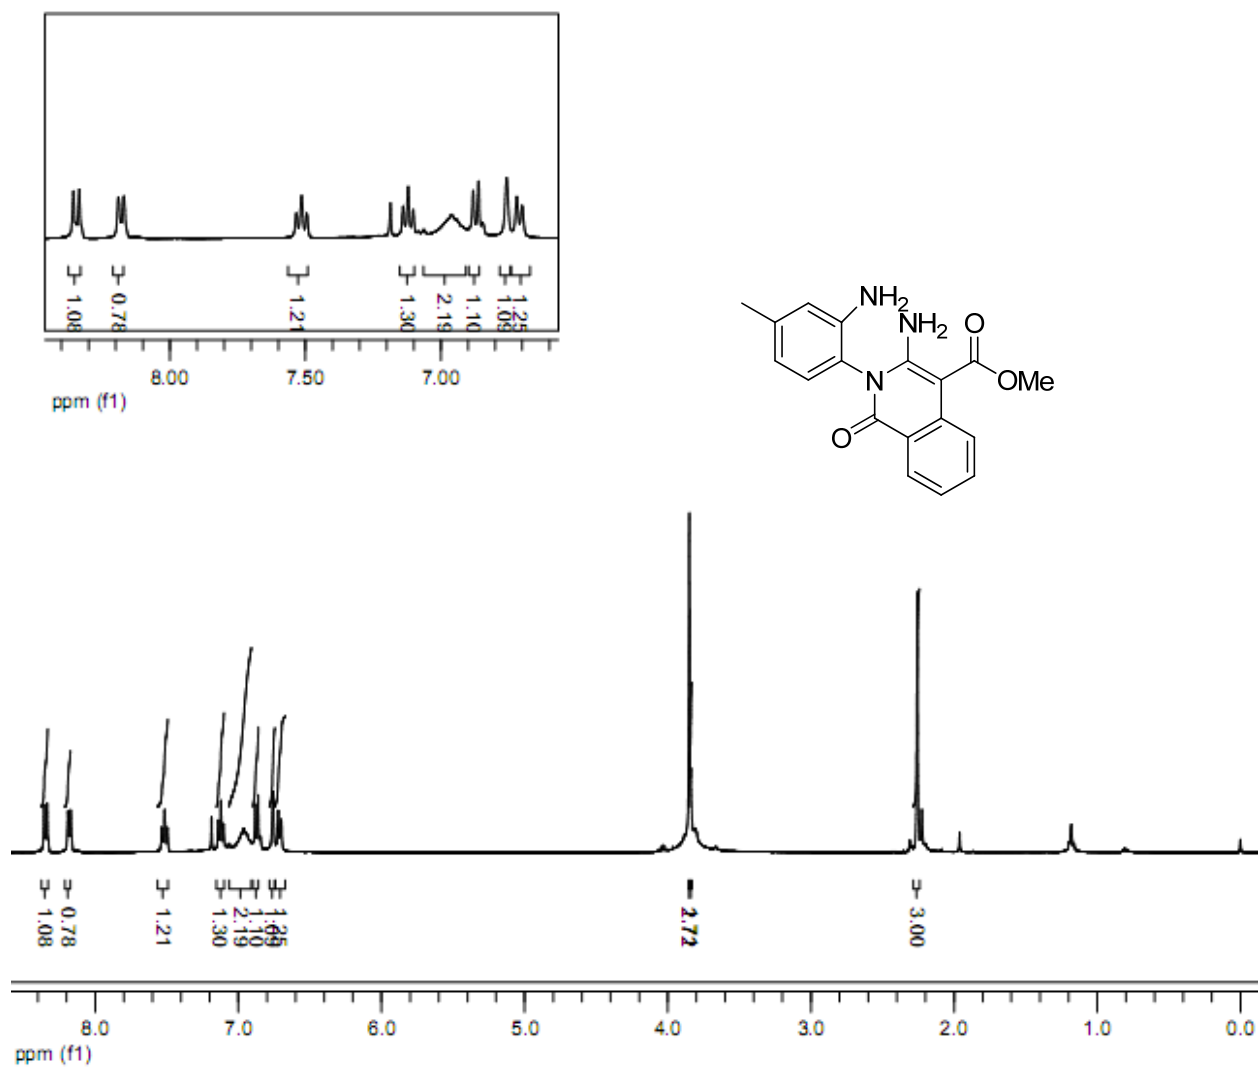

Fig. 23:  $^1\text{H}$  NMR spectra of compound **3g** ( $\text{CDCl}_3$ , 400 MHz)

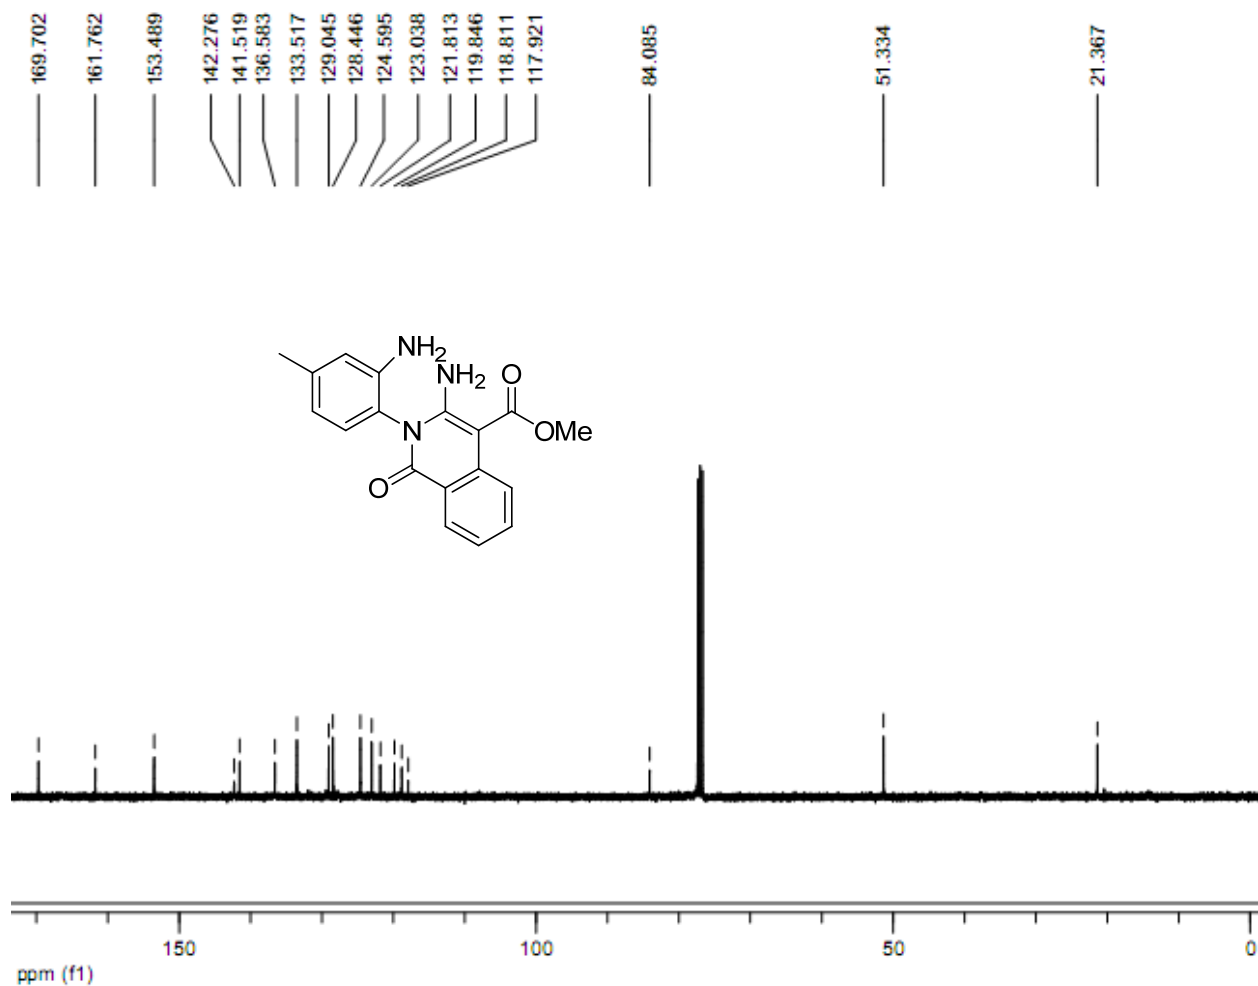

Fig. 24: <sup>13</sup>C NMR spectra of compound **3g** (CDCl<sub>3</sub>, 100 MHz)



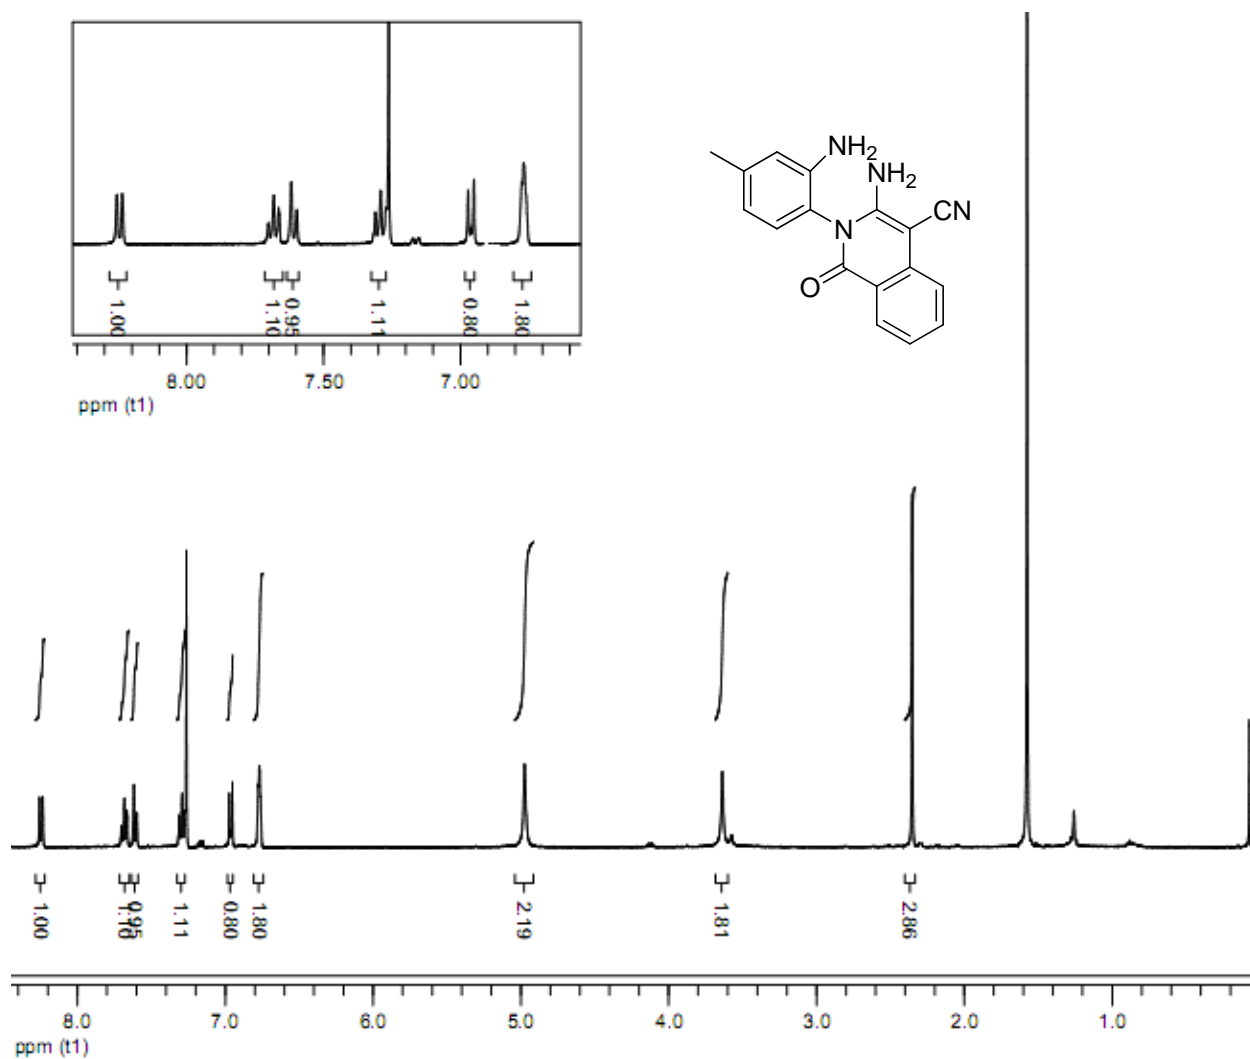

Fig. 25:  $^1\text{H}$  NMR spectra of compound **3h** ( $\text{DMSO-}d_6$ , 400 MHz)

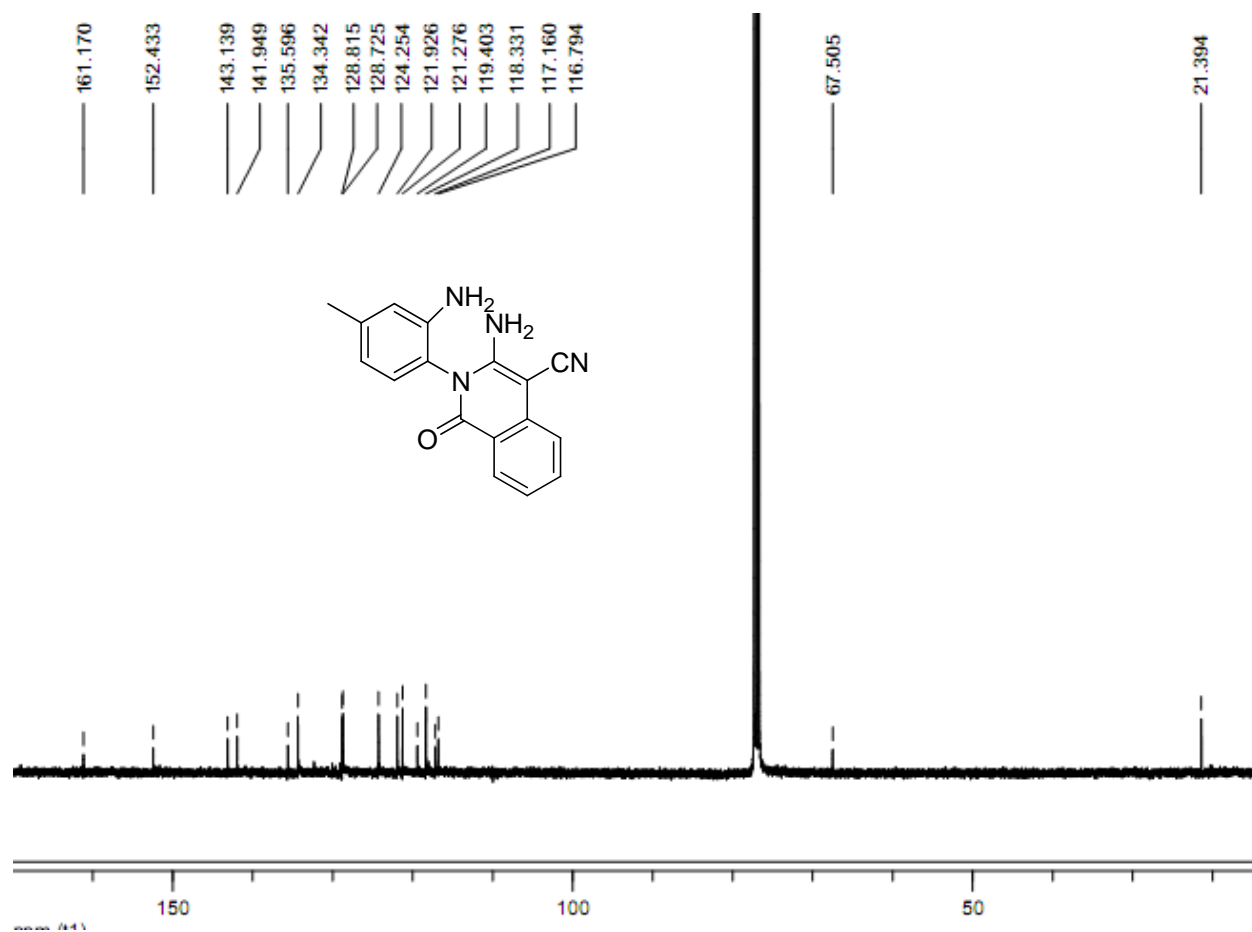

Fig. 26: <sup>13</sup>C NMR spectra of compound **3h** (DMSO-*d*<sub>6</sub>, 100 MHz)

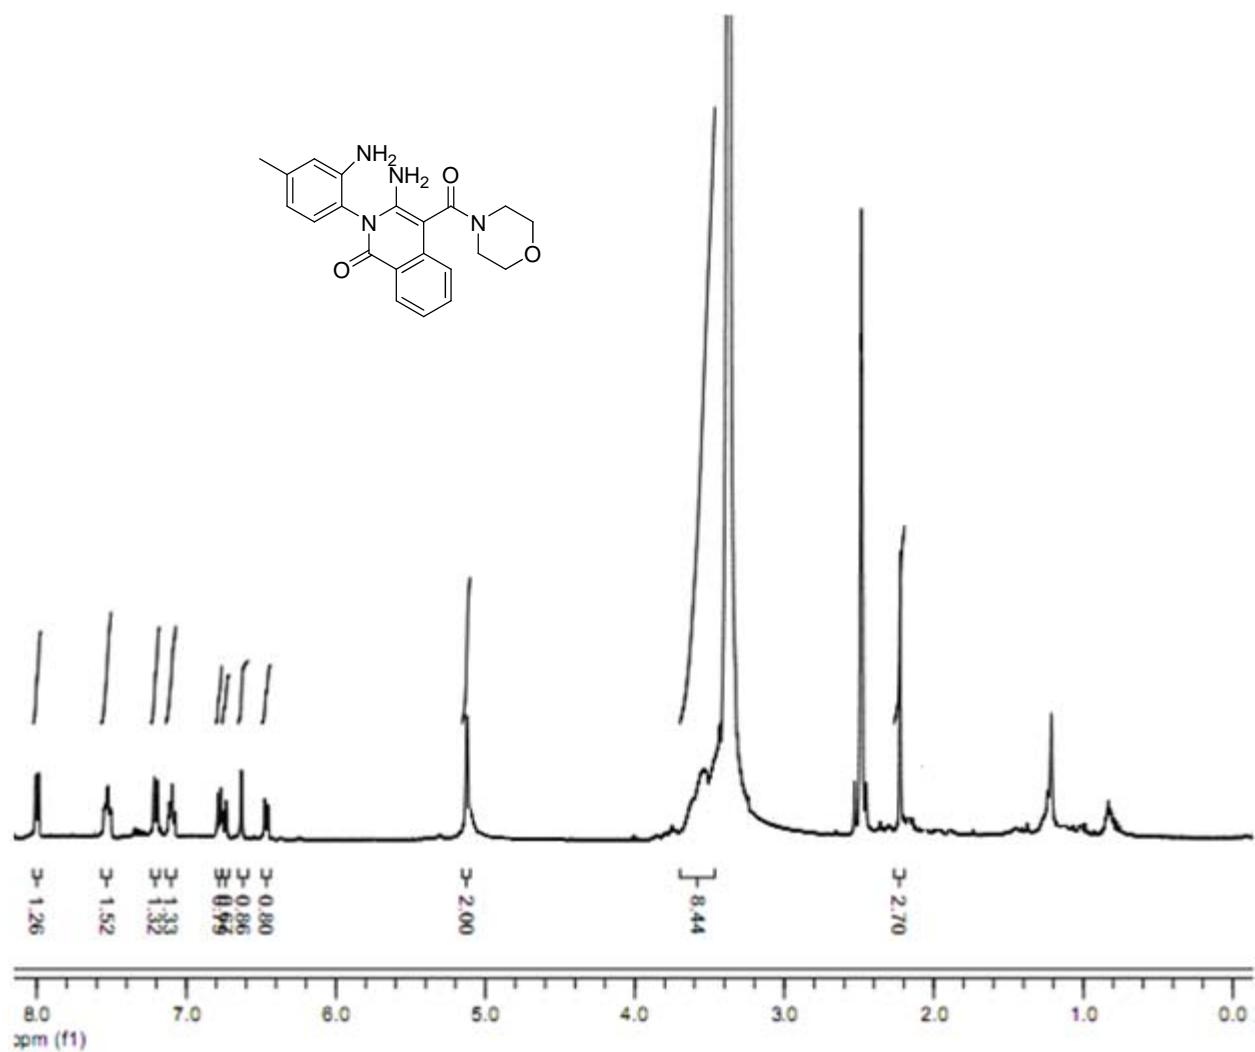

Fig. 27: <sup>1</sup>H NMR spectra of compound **3i** (DMSO-*d*<sub>6</sub>, 400 MHz)

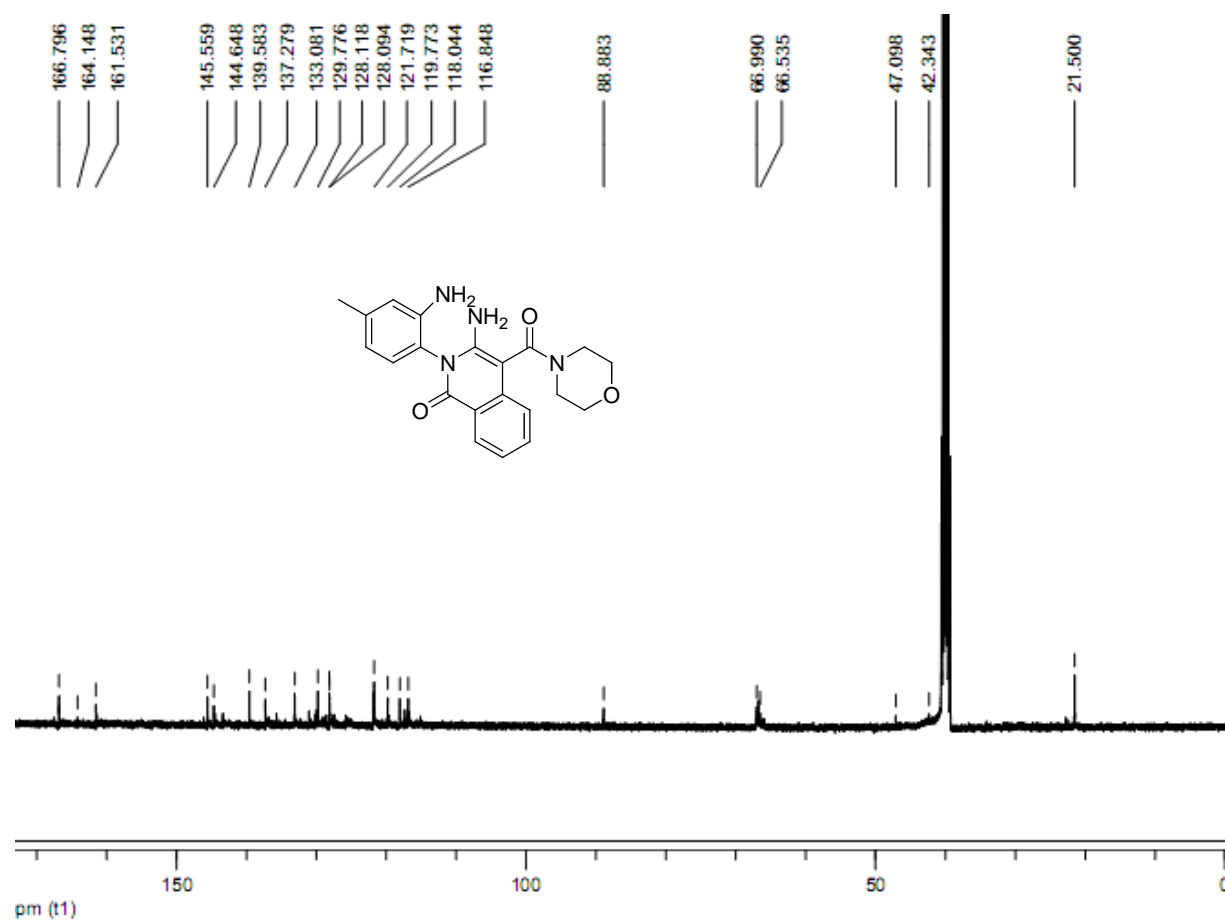

Fig. 28: <sup>13</sup>C NMR spectra of compound **3i** (DMSO-*d*<sub>6</sub>, 100 MHz)

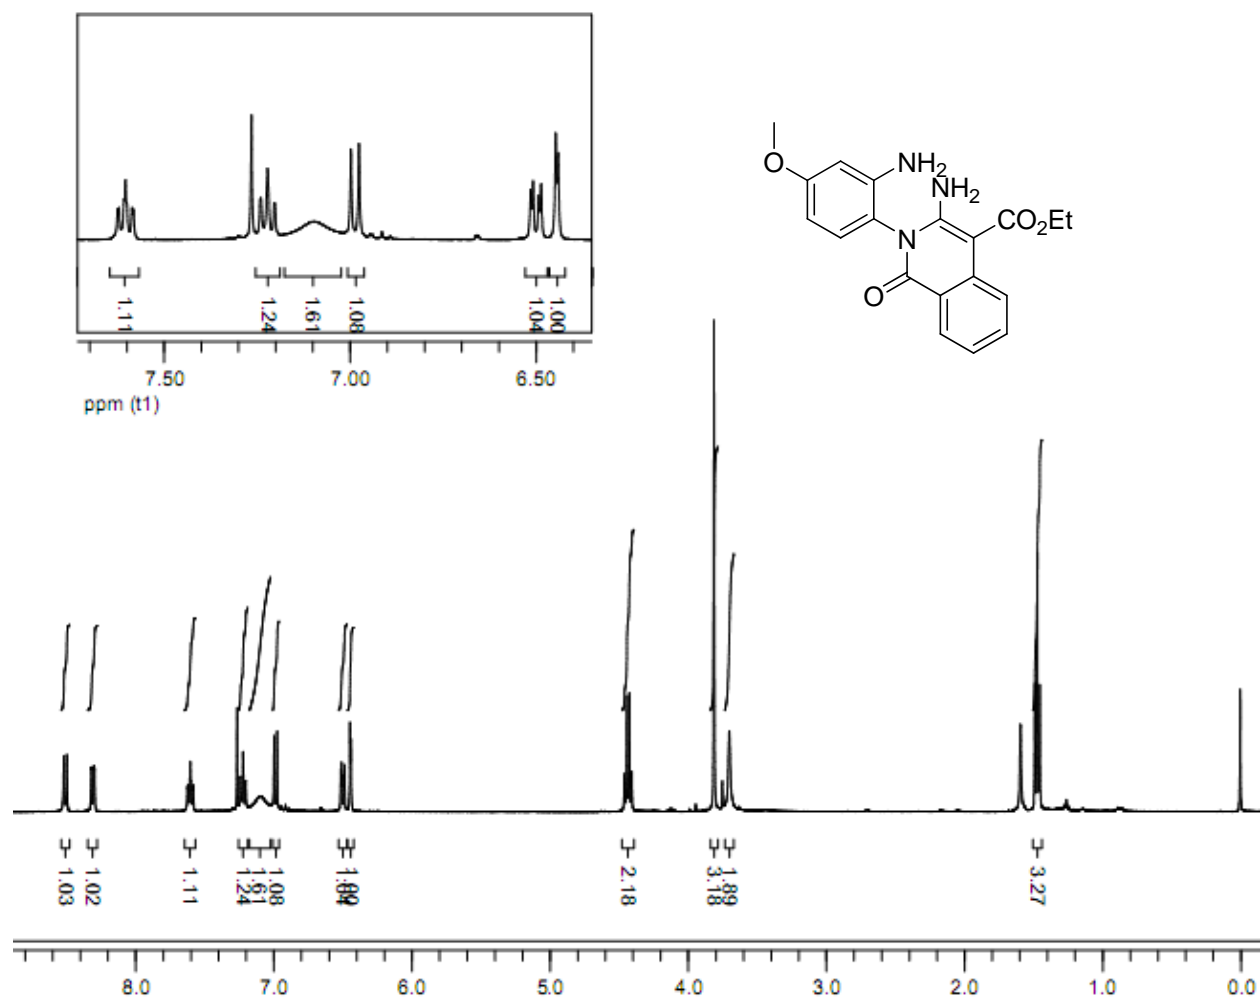

Fig. 29:  $^1\text{H}$  NMR spectra of compound **3j** ( $\text{CDCl}_3$ , 400 MHz)

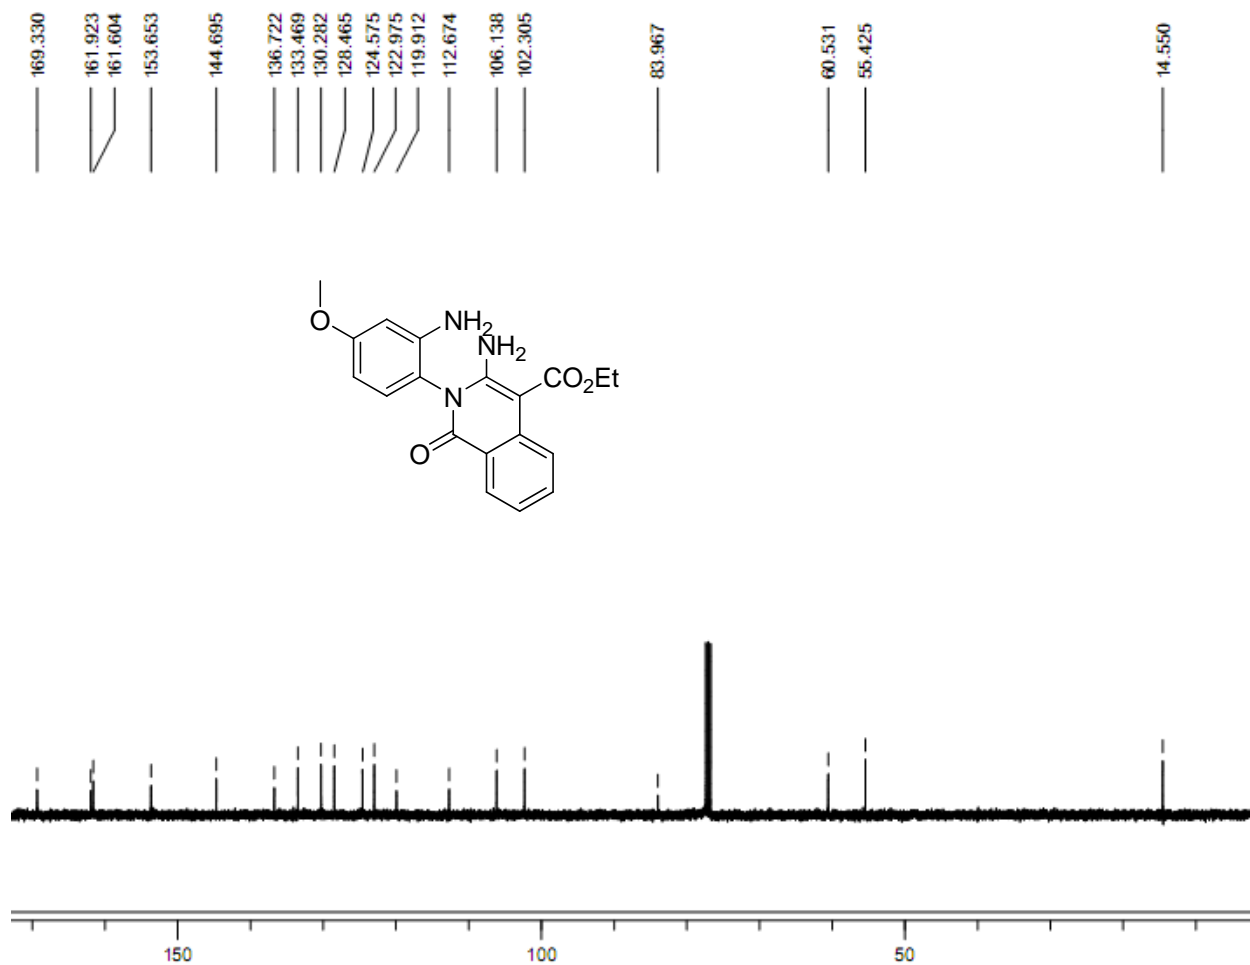

Fig. 30: <sup>13</sup>C NMR spectra of compound **3j** (CDCl<sub>3</sub>, 100 MHz)

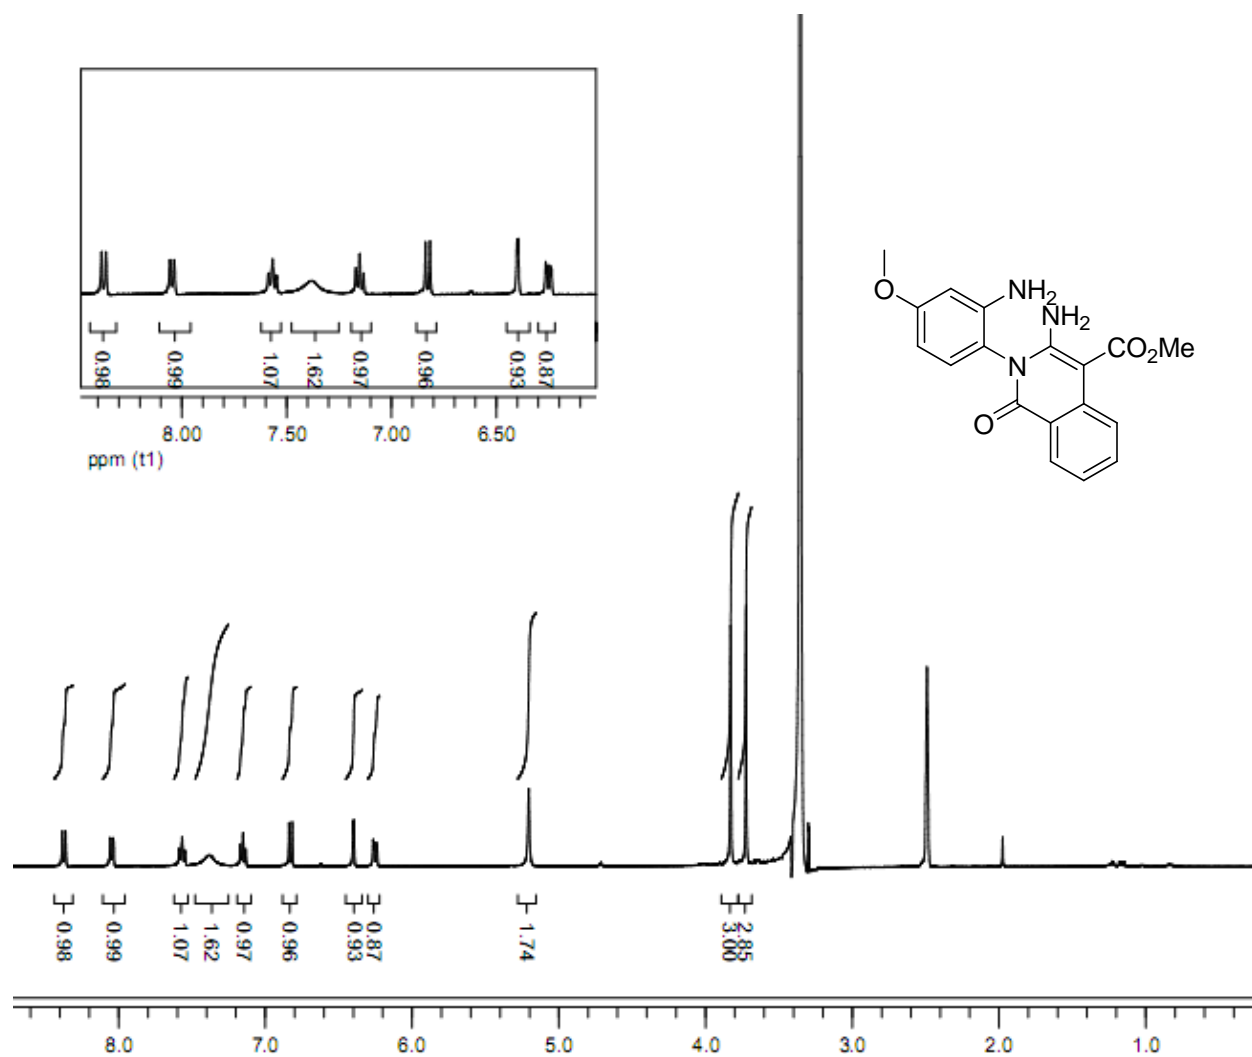

Fig. 31:  $^1\text{H}$  NMR spectra of compound **3k** ( $\text{DMSO-}d_6$ , 400 MHz)

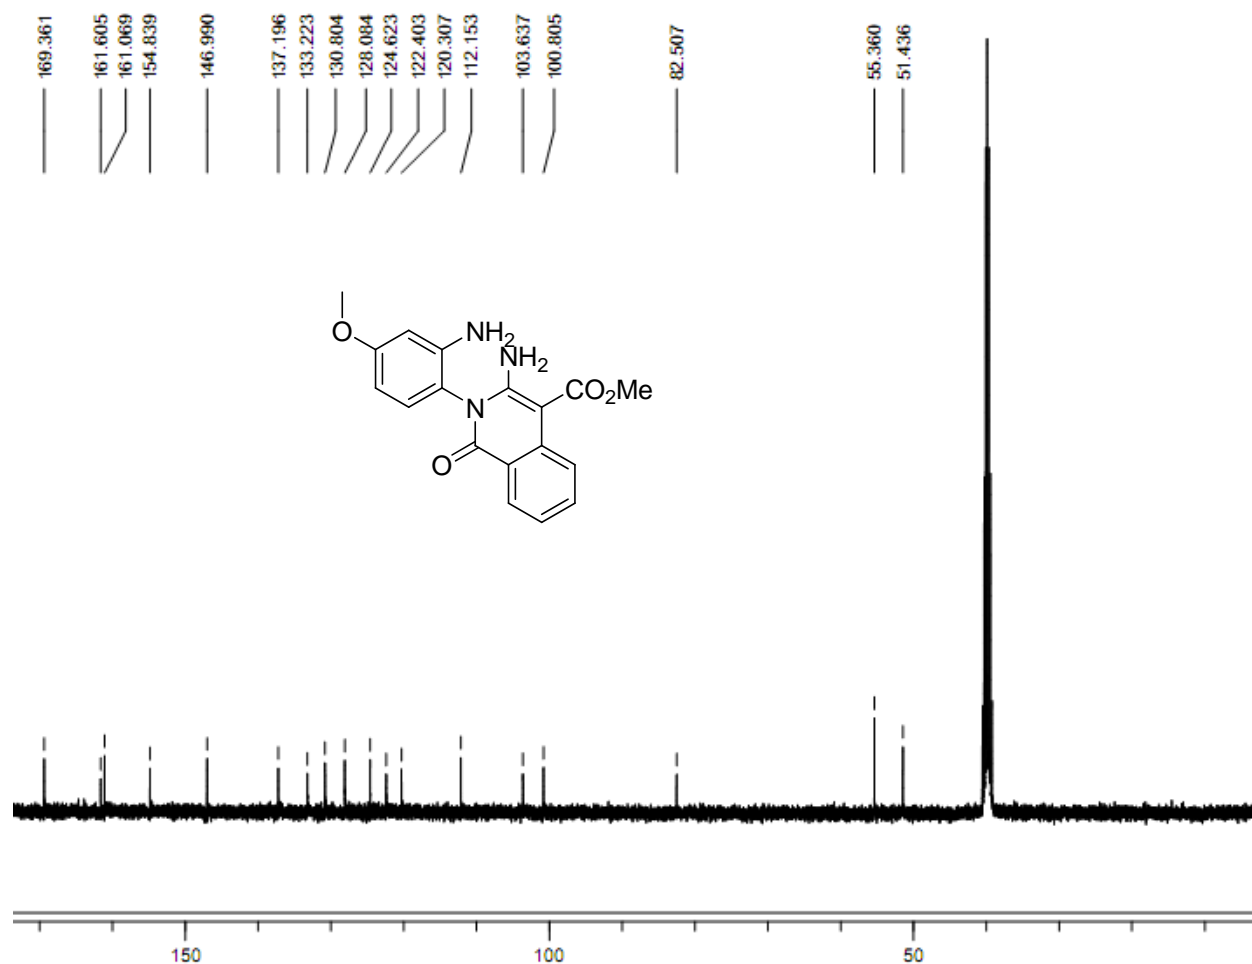

Fig. 32: <sup>13</sup>C NMR spectra of compound **3k** (DMSO-*d*<sub>6</sub>, 100 MHz)



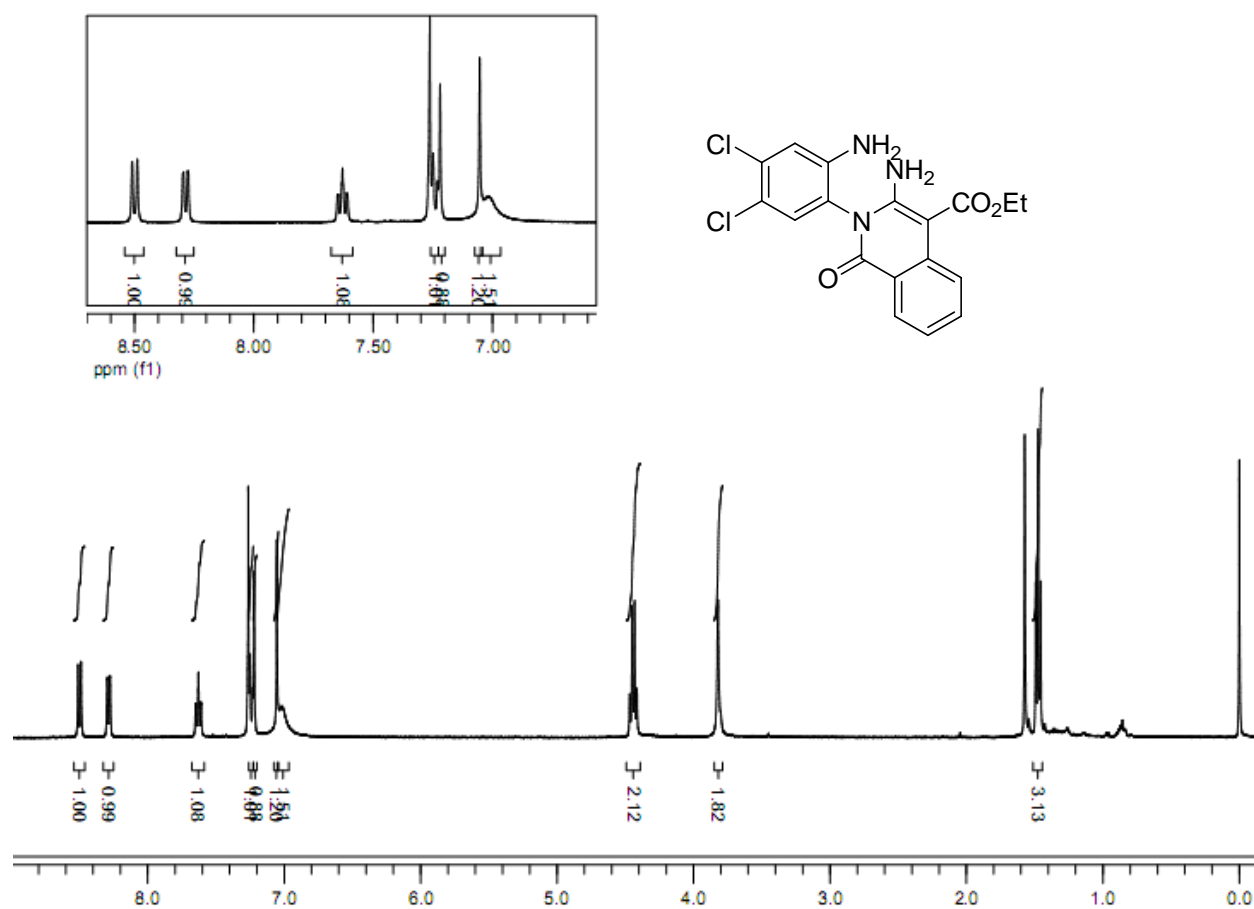

Fig. 33: <sup>1</sup>H NMR spectra of compound **3l** (CDCl<sub>3</sub>, 400 MHz)

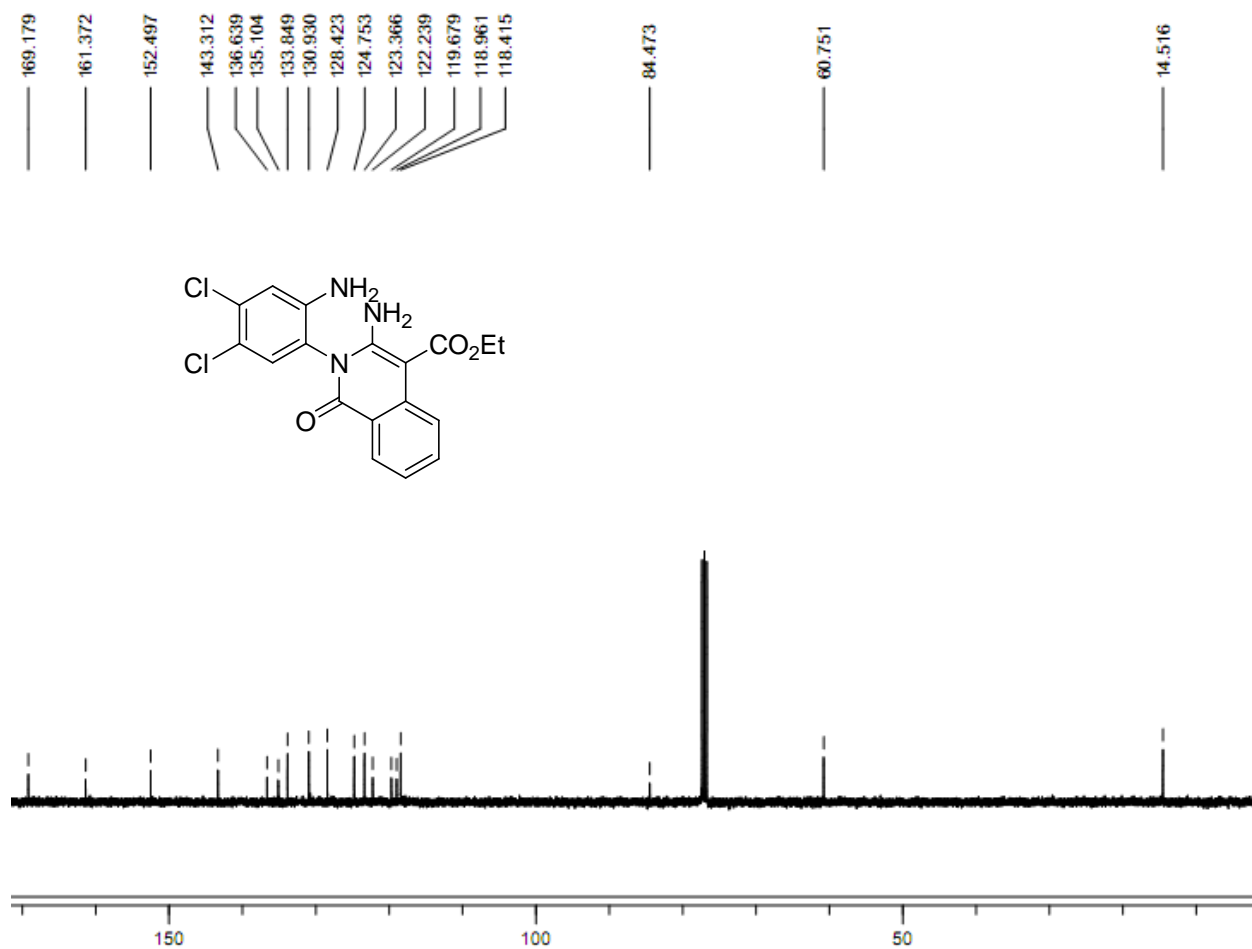

Fig. 34:  $^{13}\text{C}$  NMR spectra of compound **3l** ( $\text{CDCl}_3$ , 100 MHz)

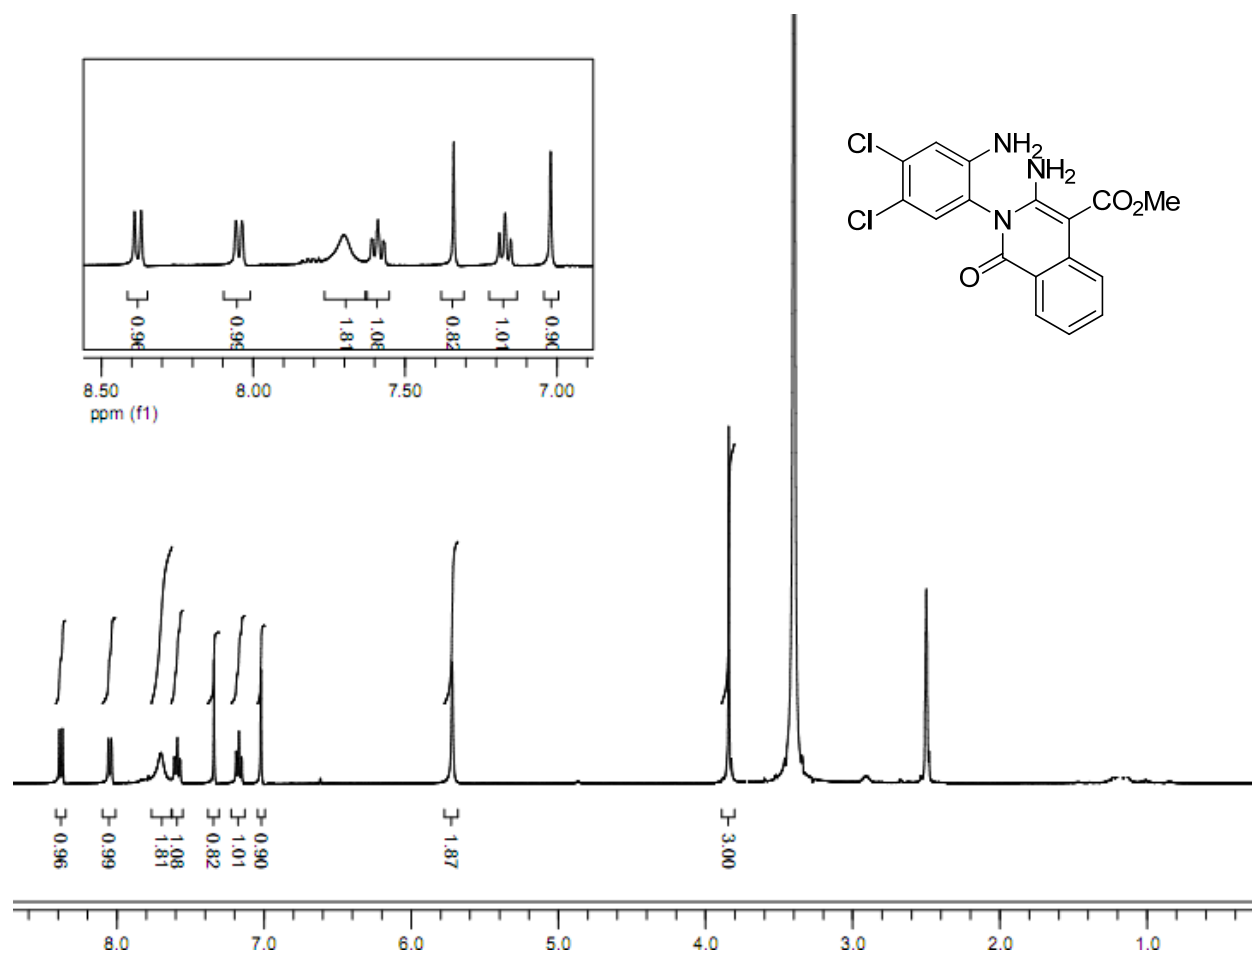

Fig. 35:  $^1\text{H}$  NMR spectra of compound **3m** ( $\text{DMSO-}d_6$ , 400 MHz)

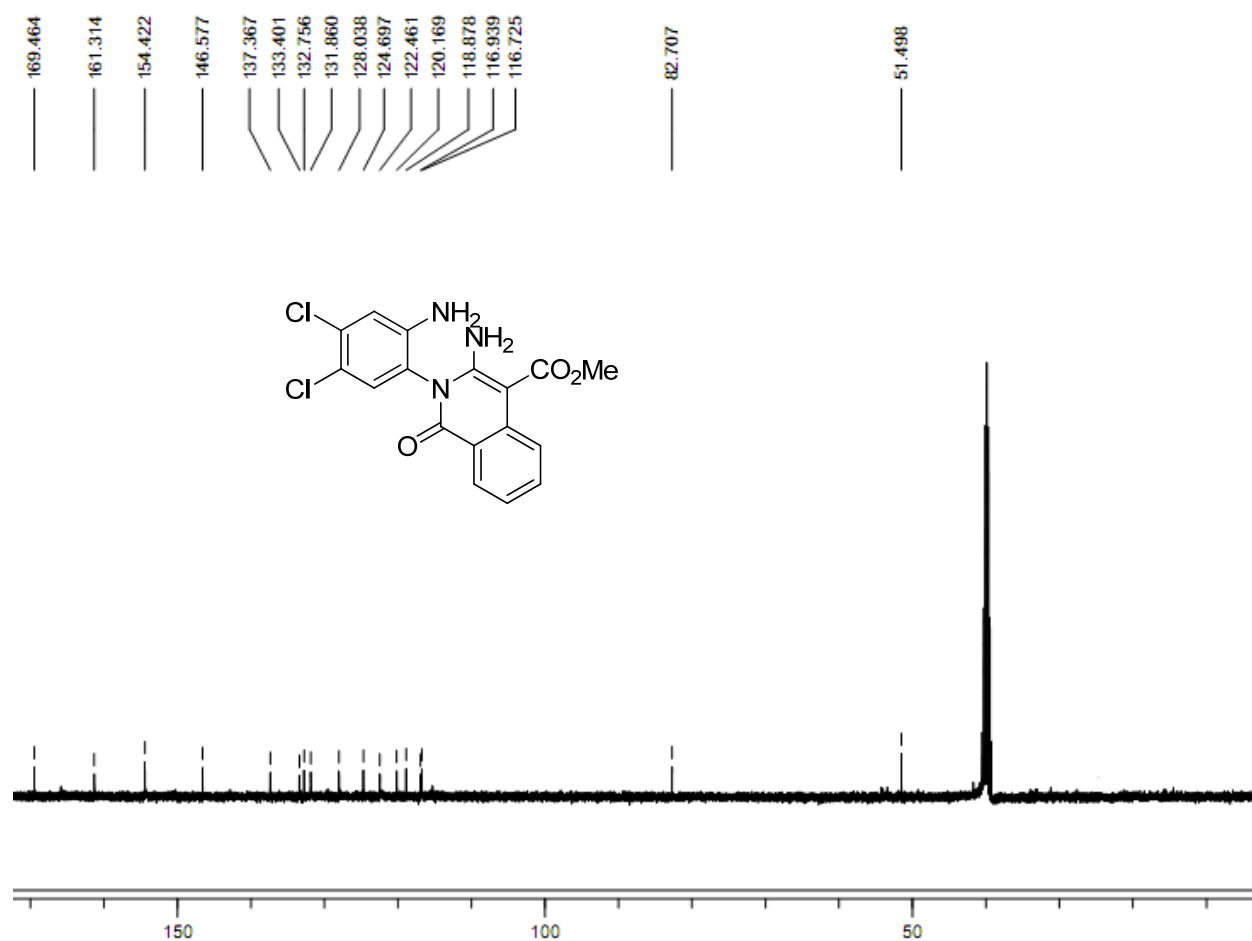

Fig. 36: <sup>13</sup>C NMR spectra of compound **3m** (DMSO-*d*<sub>6</sub>, 100 MHz)

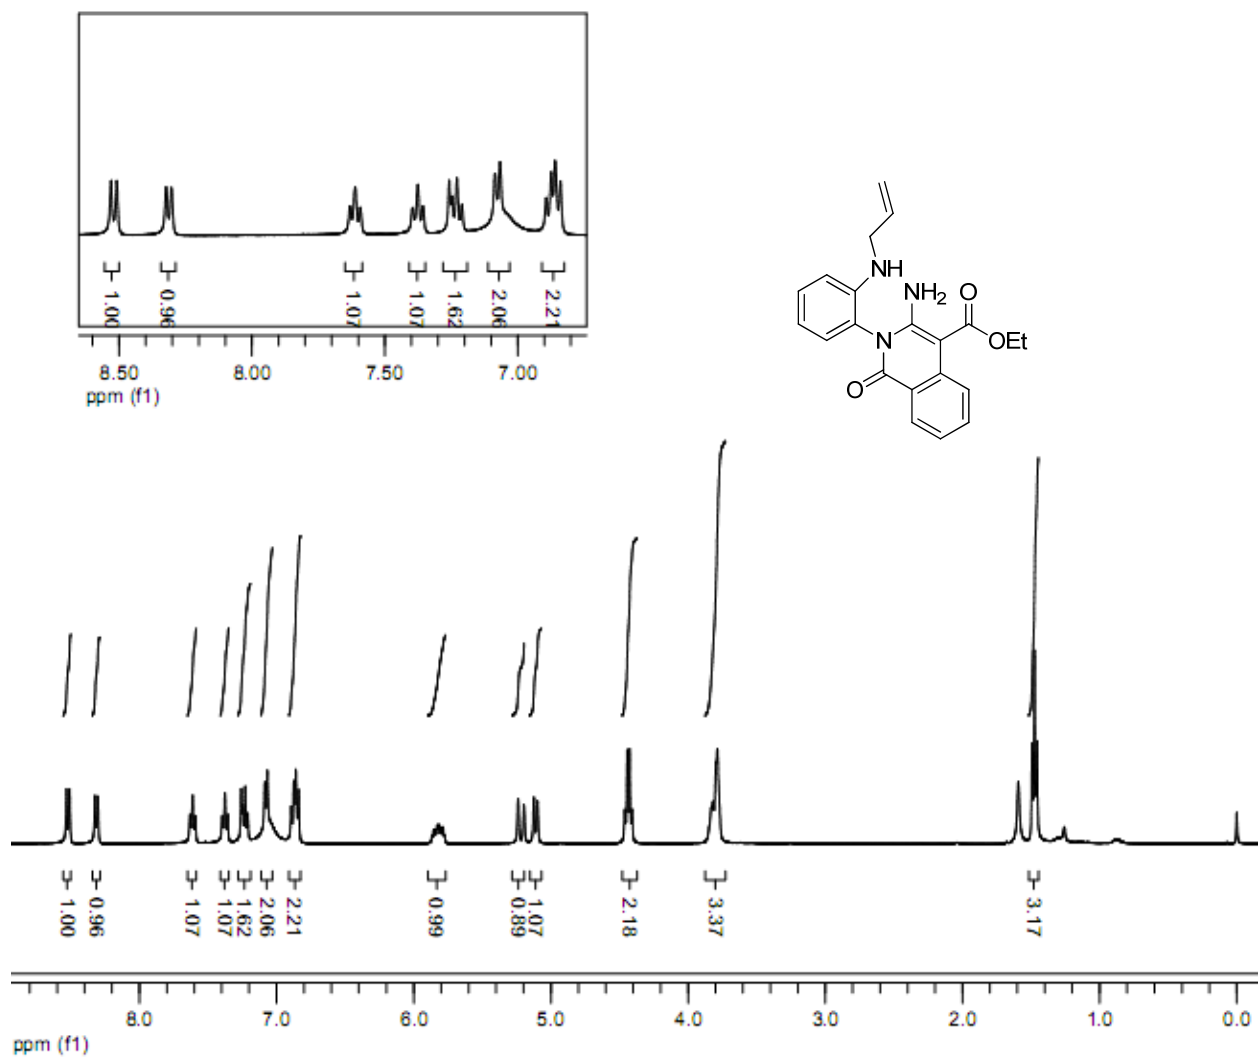

Fig. 37:  $^1\text{H}$  NMR spectra of compound **3n** ( $\text{CDCl}_3$ , 400 MHz)

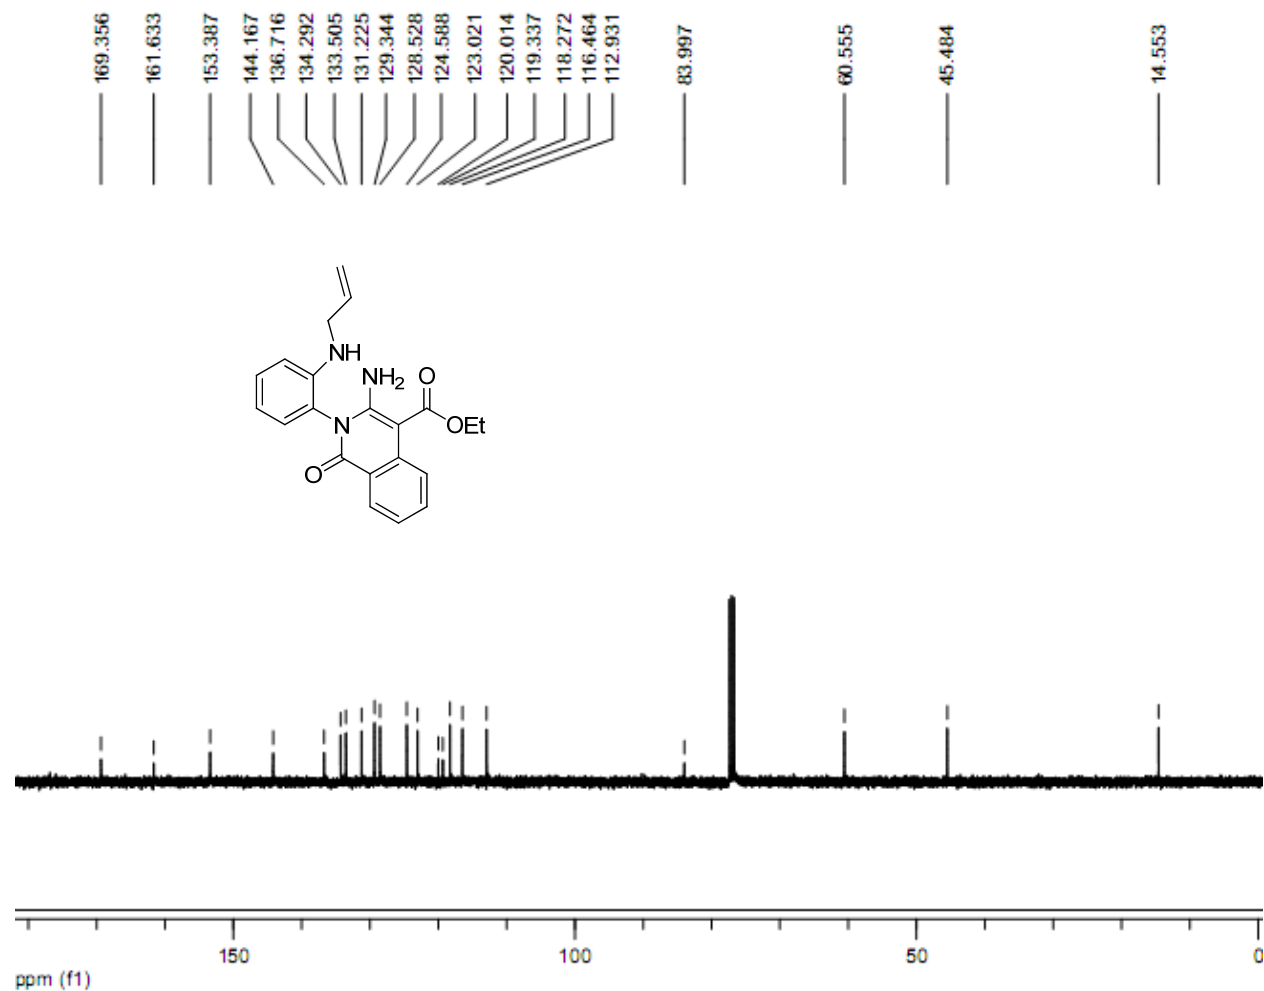

Fig. 38: <sup>13</sup>C NMR spectra of compound **3n** (CDCl<sub>3</sub>, 100 MHz)

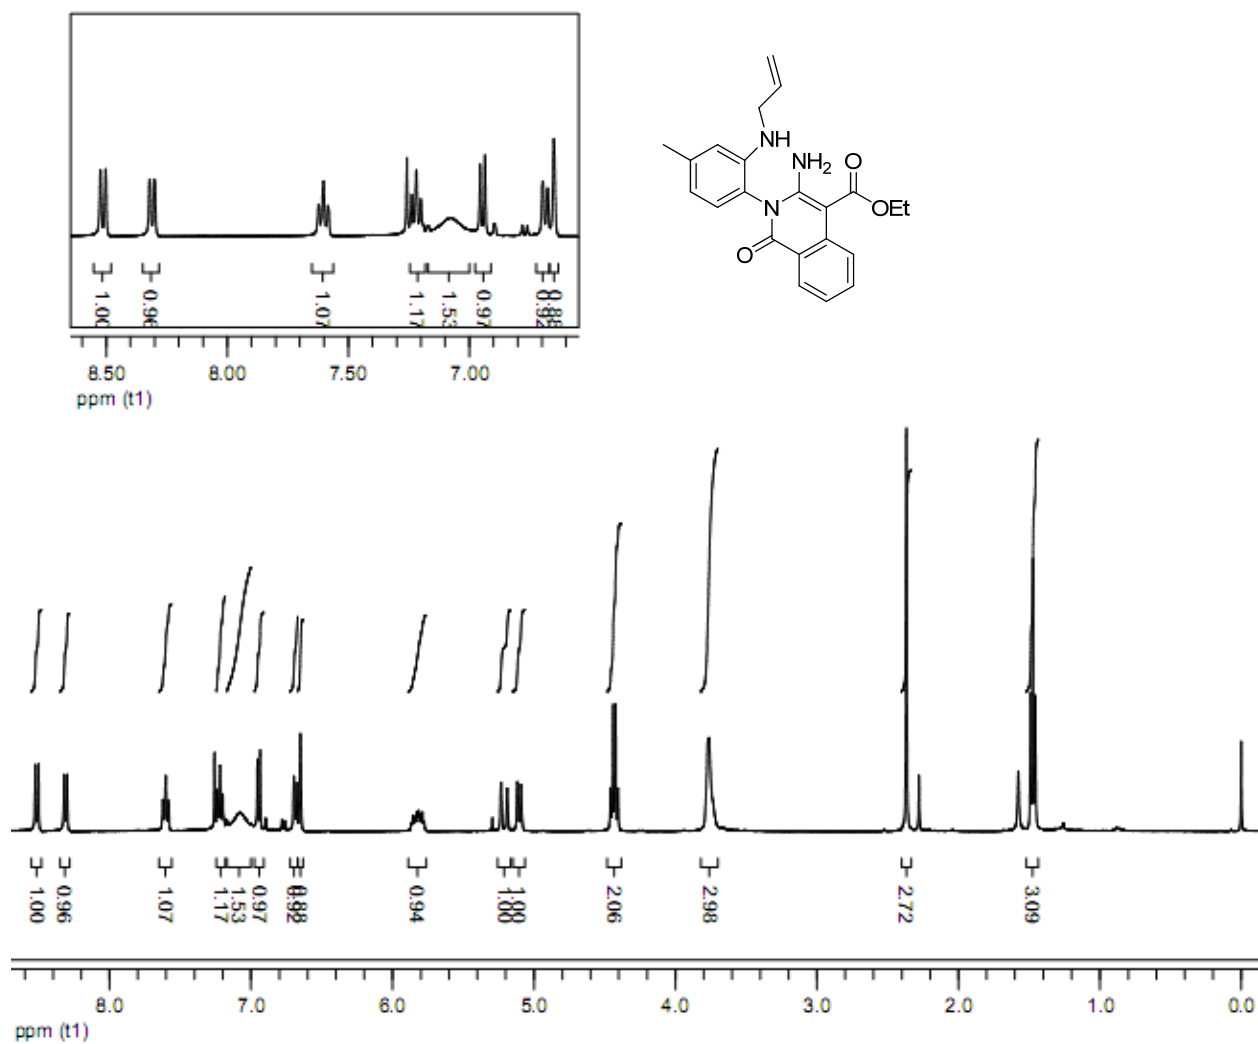

Fig. 39:  $^1\text{H}$  NMR spectra of compound **3o** ( $\text{CDCl}_3$ , 400 MHz)

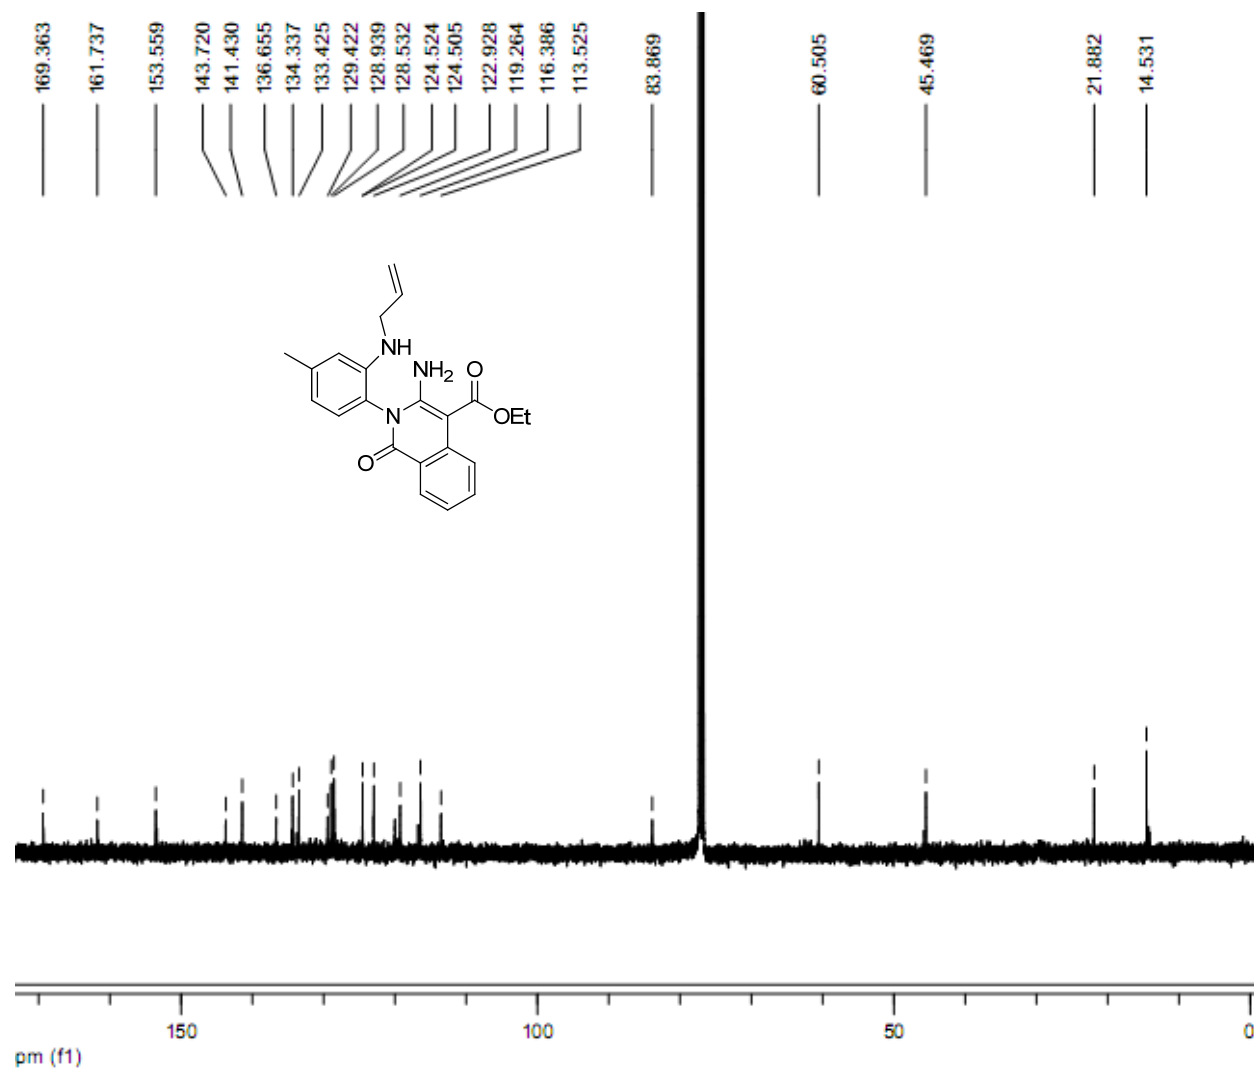

Fig. 40: <sup>13</sup>C NMR spectra of compound **30** (CDCl<sub>3</sub>, 100 MHz)



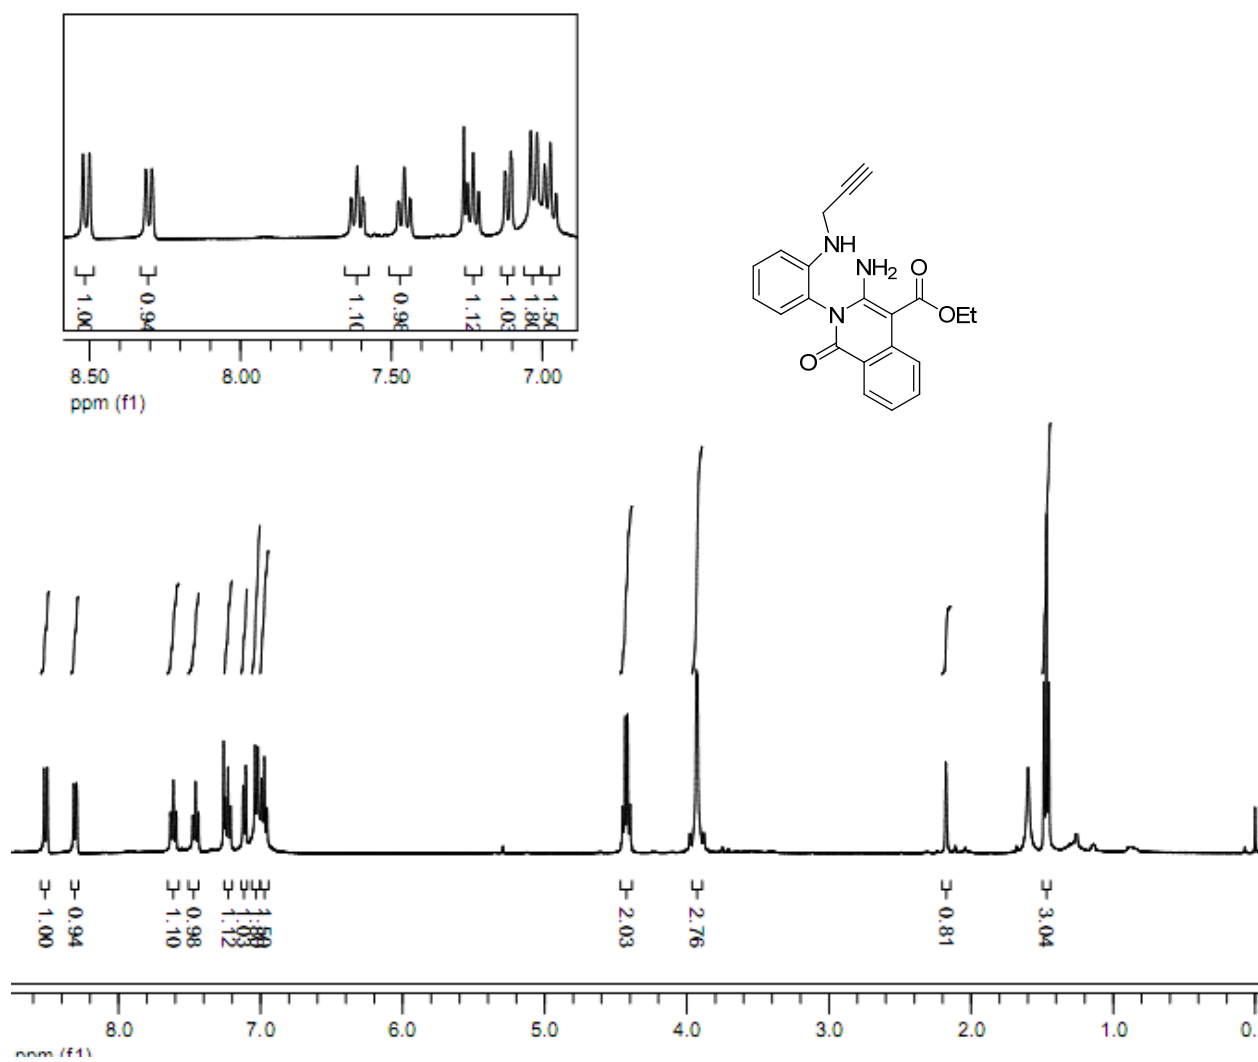

Fig. 41:  $^1\text{H}$  NMR spectra of compound **3p** ( $\text{CDCl}_3$ , 400 MHz)

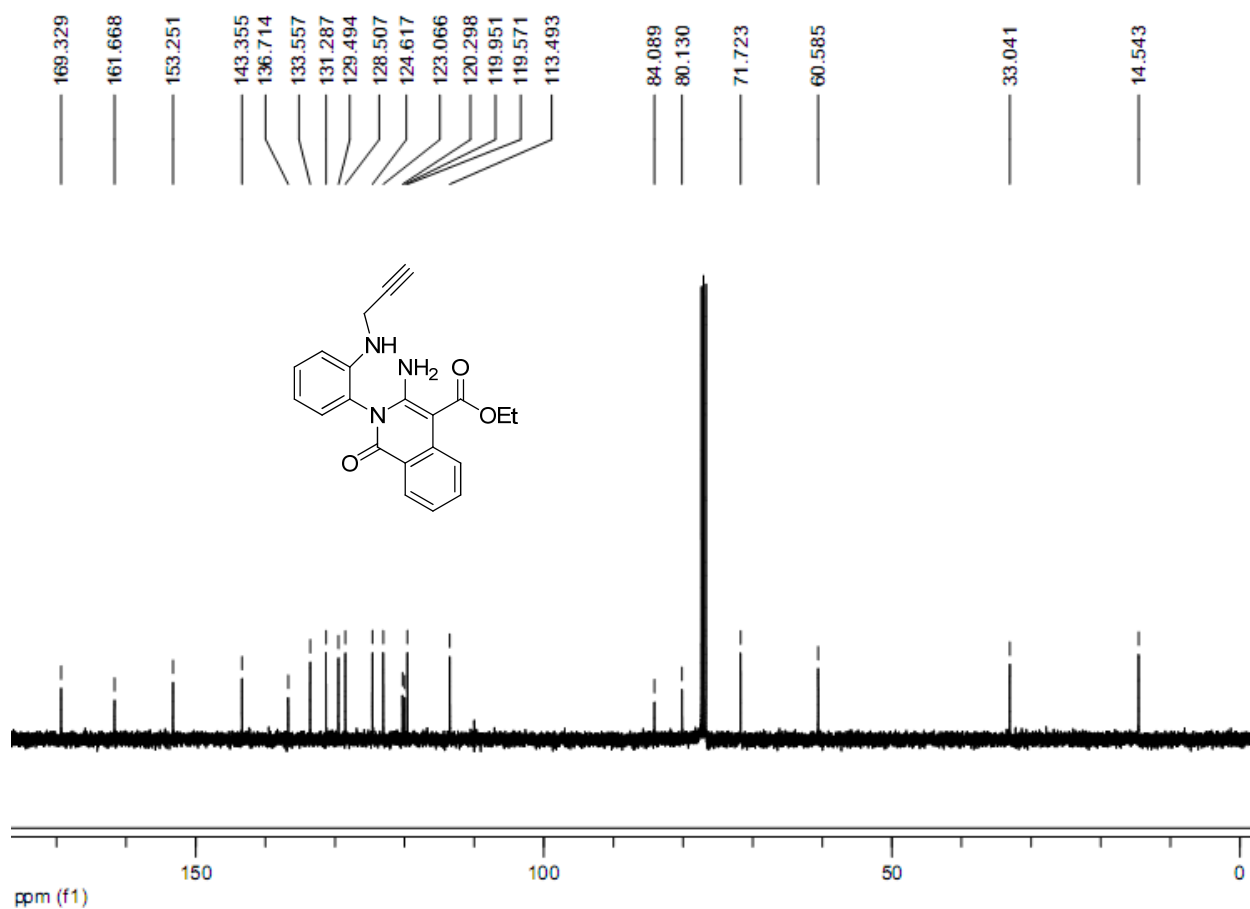

Fig. 42: <sup>13</sup>C NMR spectra of compound **3p** (CDCl<sub>3</sub>, 100 MHz)

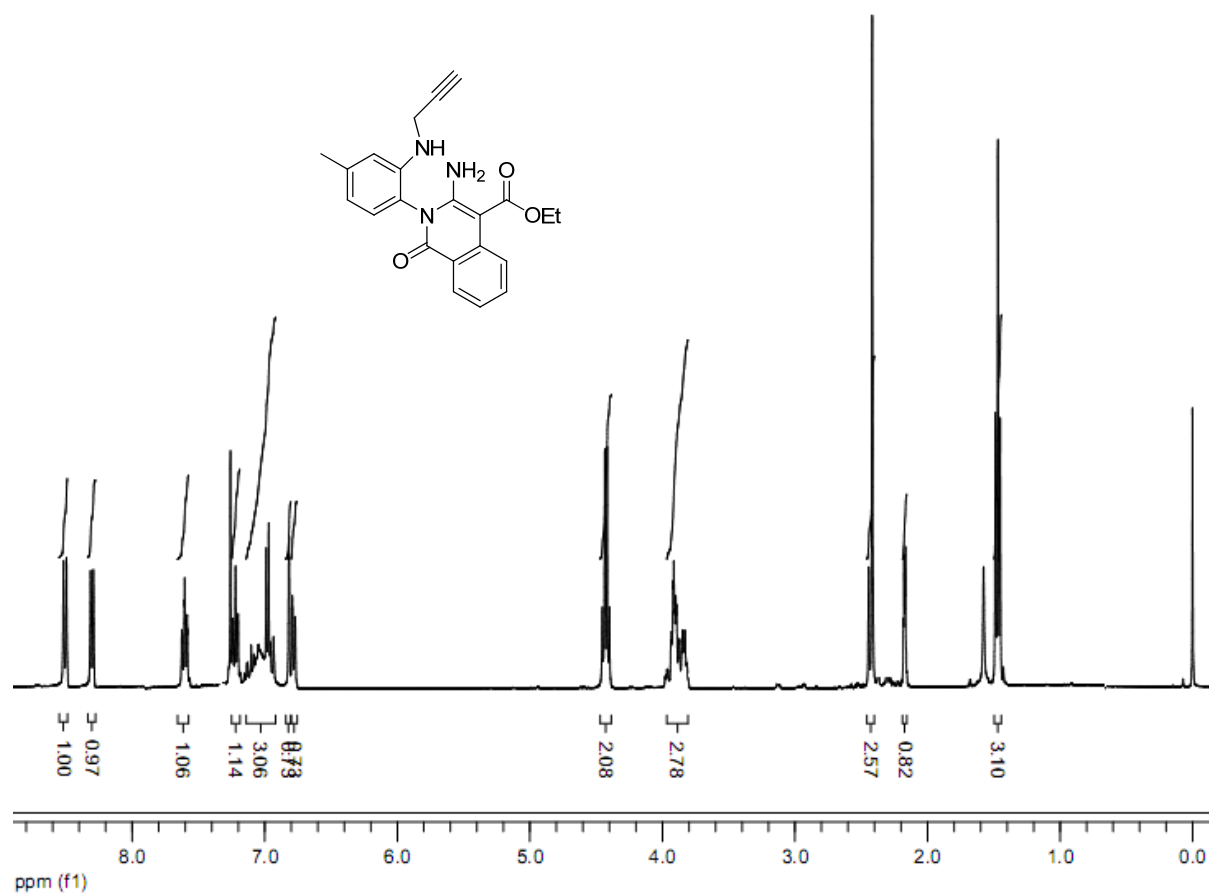

Fig. 43:  $^1\text{H}$  NMR spectra of compound **3q** (CDCl<sub>3</sub>, 400 MHz)

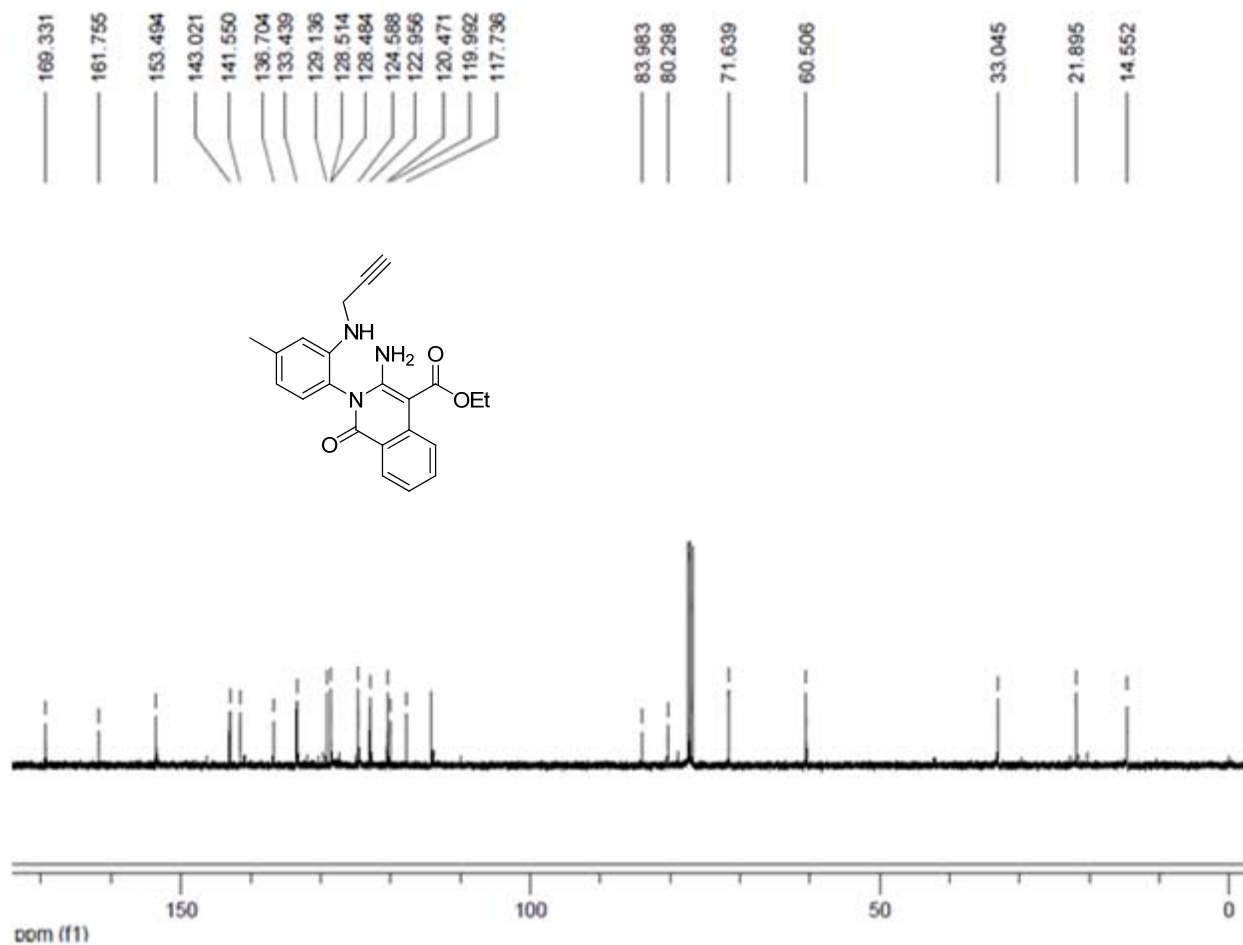

Fig. 44: <sup>13</sup>C NMR spectra of compound **3q** (CDCl<sub>3</sub>, 100 MHz)

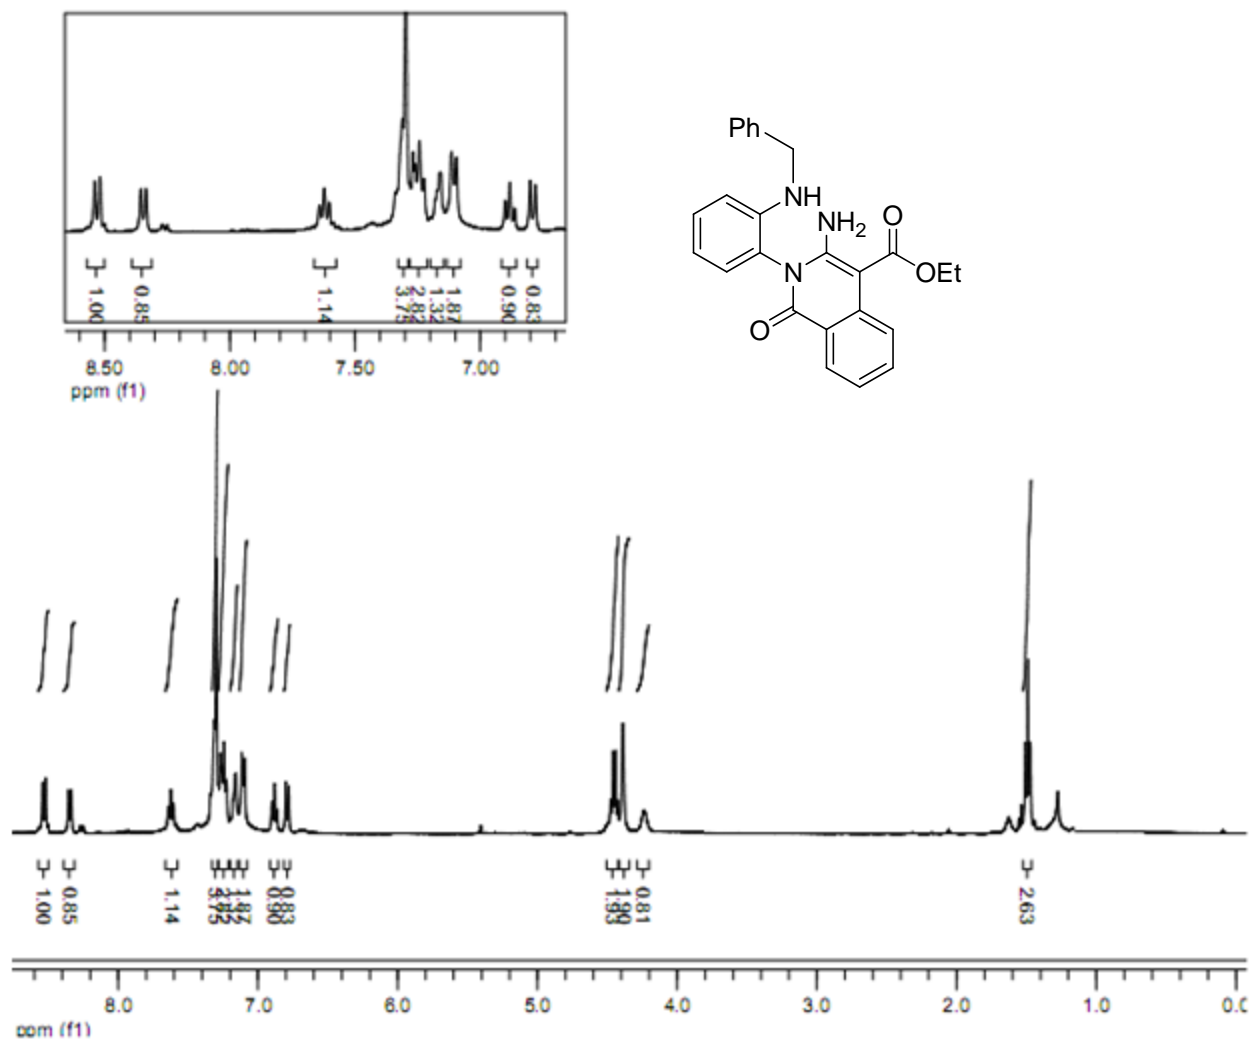

Fig. 45:  $^1\text{H}$  NMR spectra of compound **3r** ( $\text{CDCl}_3$ , 400 MHz)

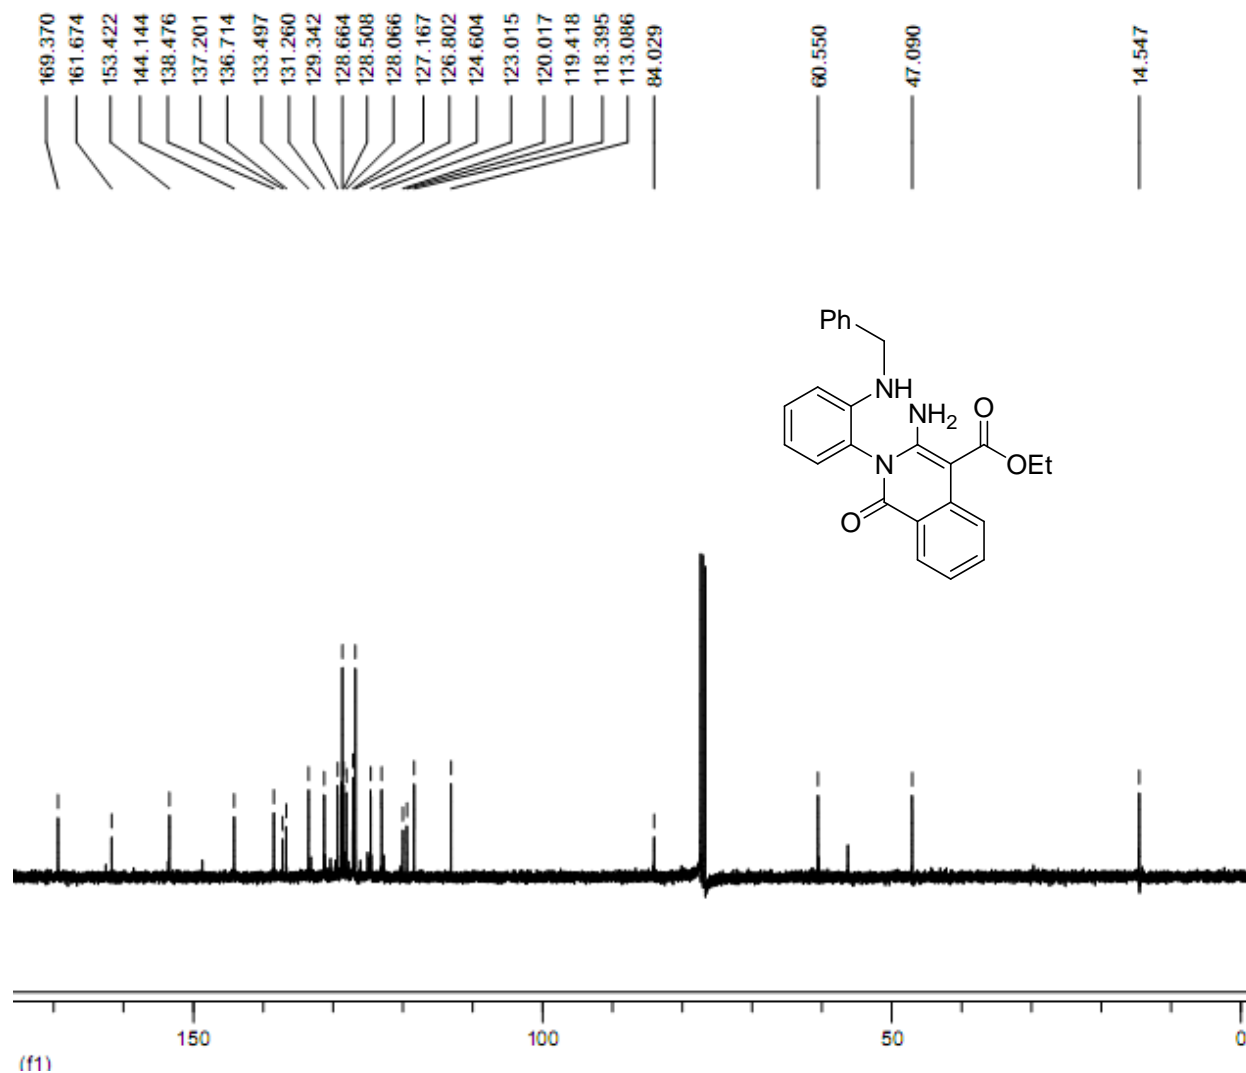

Fig. 46:  $^{13}\text{C}$  NMR spectra of compound **3r** ( $\text{CDCl}_3$ , 100 MHz)

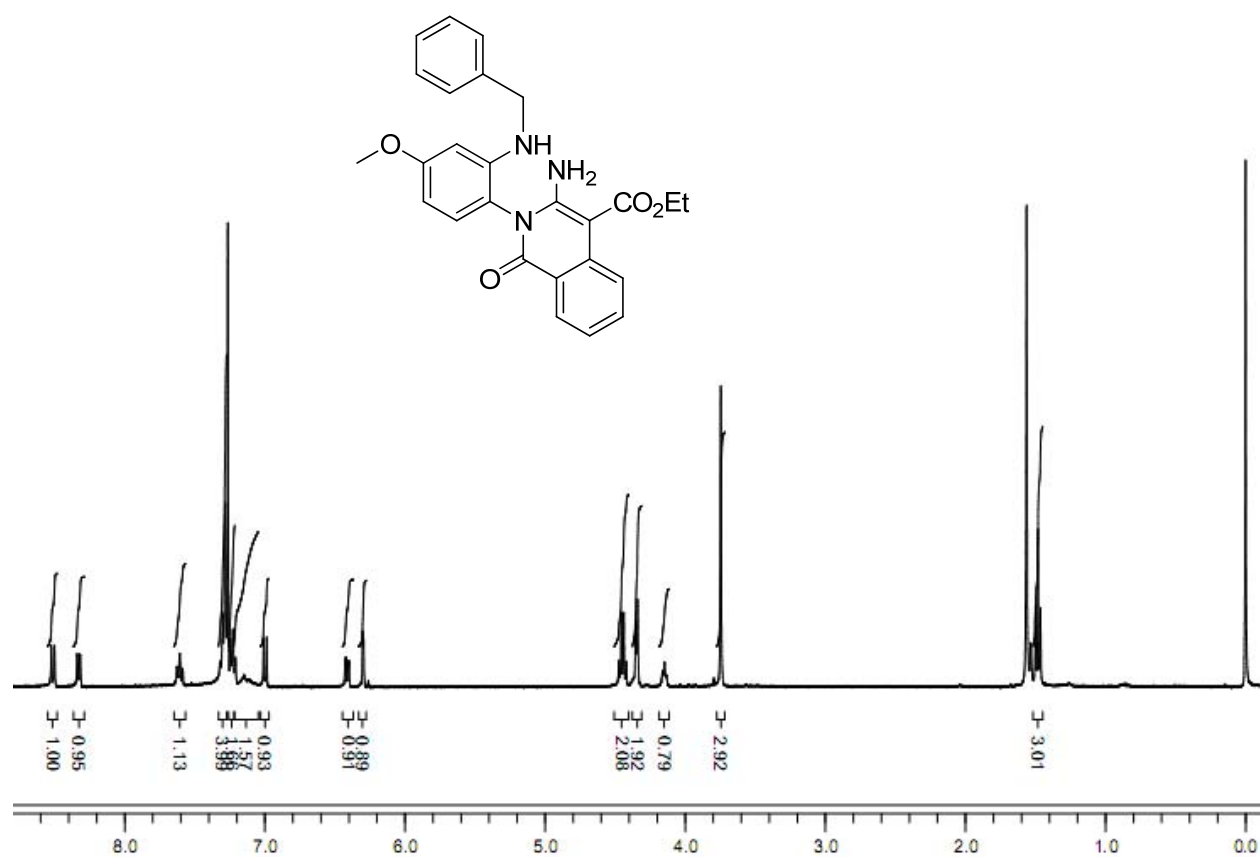

Fig. 47: <sup>1</sup>H NMR spectra of compound **3s** (CDCl<sub>3</sub>, 400 MHz)

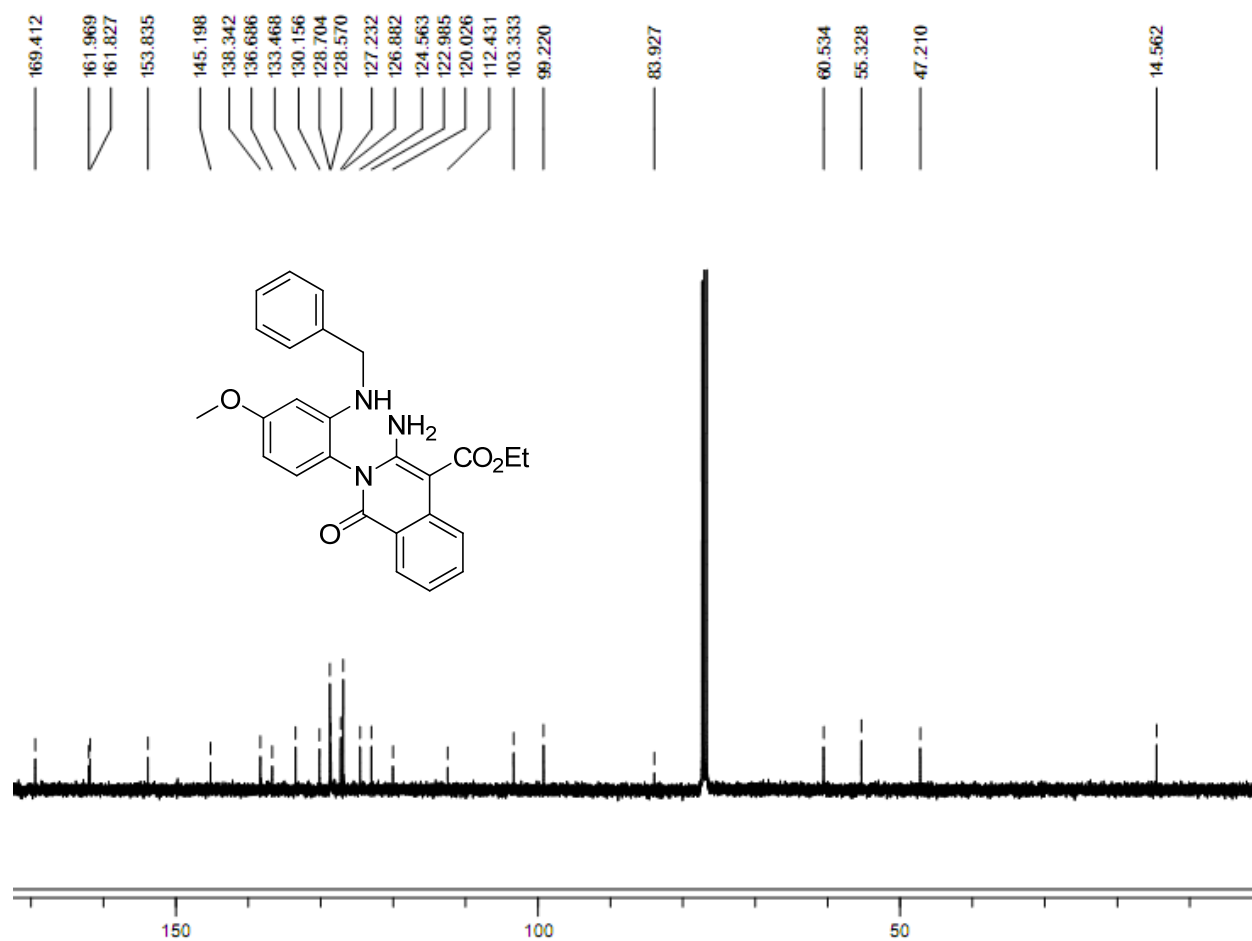

Fig. 48: <sup>13</sup>C NMR spectra of compound **3s** (CDCl<sub>3</sub>, 100 MHz)



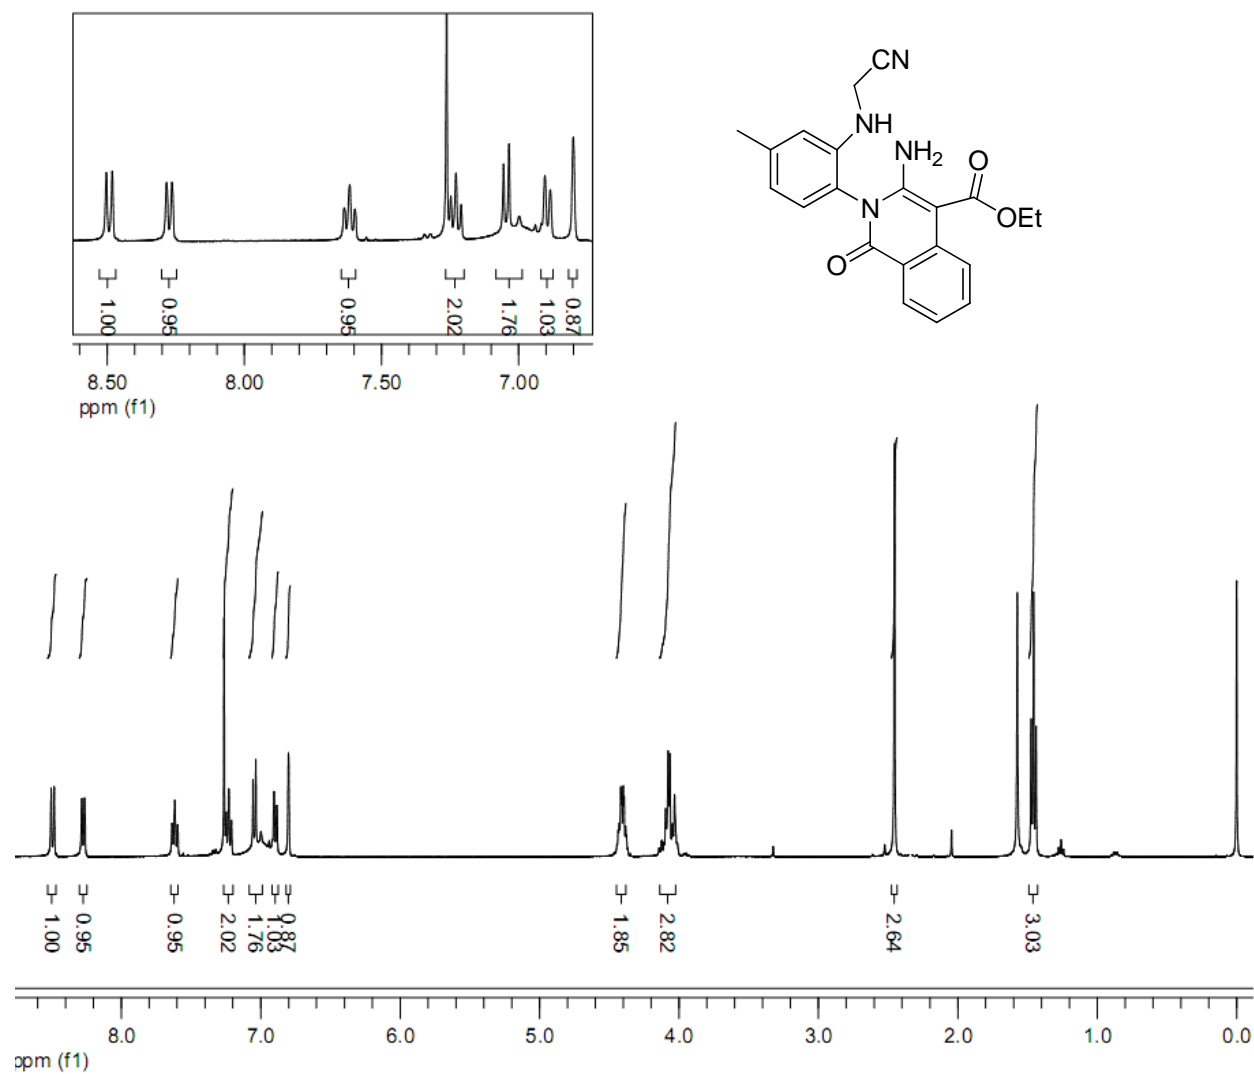

Fig. 49:  $^1\text{H}$  NMR spectra of compound **3t** ( $\text{CDCl}_3$ , 400 MHz)

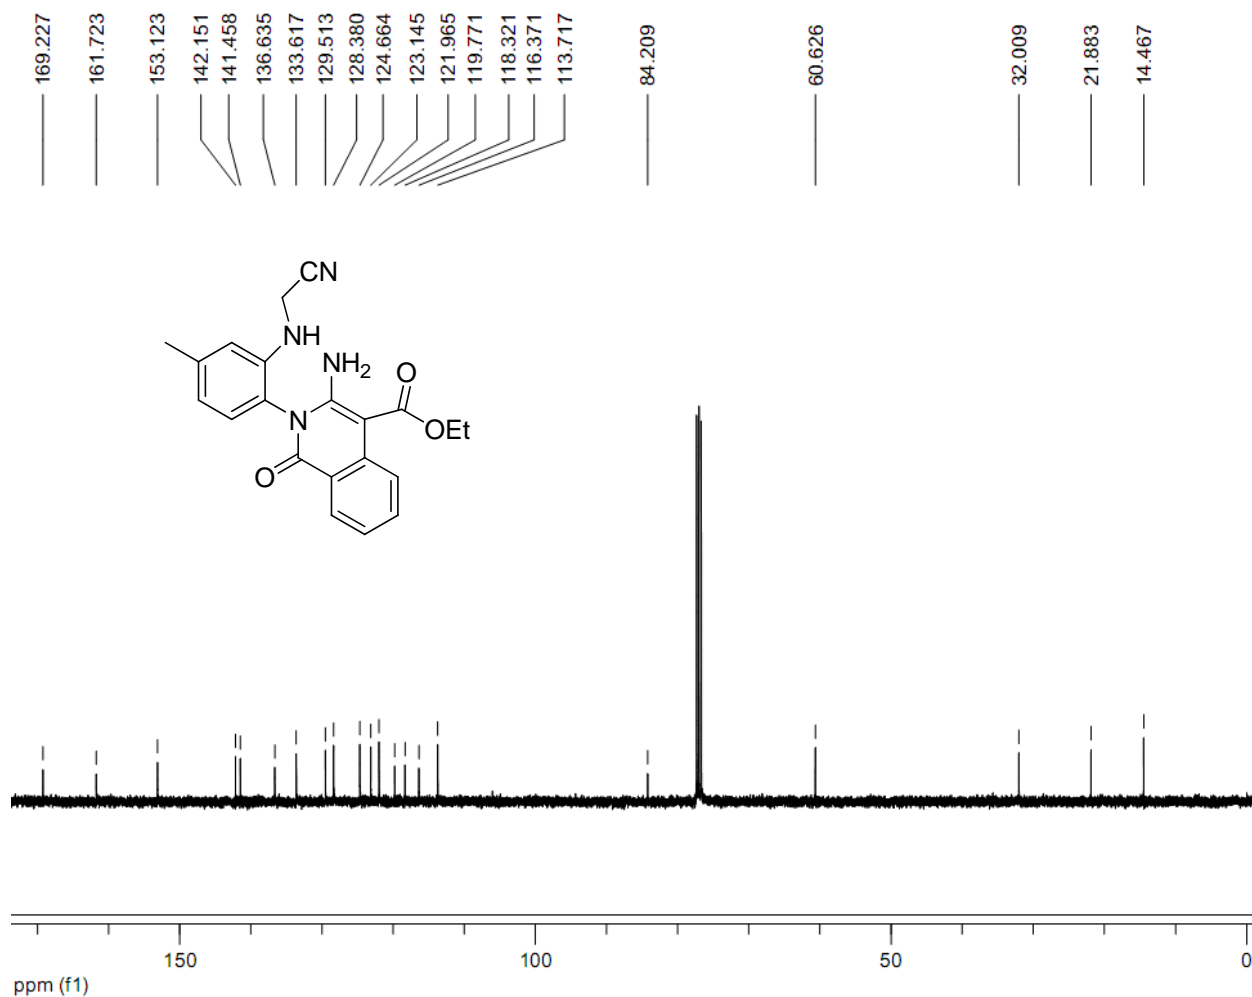

Fig. 50: <sup>13</sup>C NMR spectra of compound **3t** (CDCl<sub>3</sub>, 100 MHz)

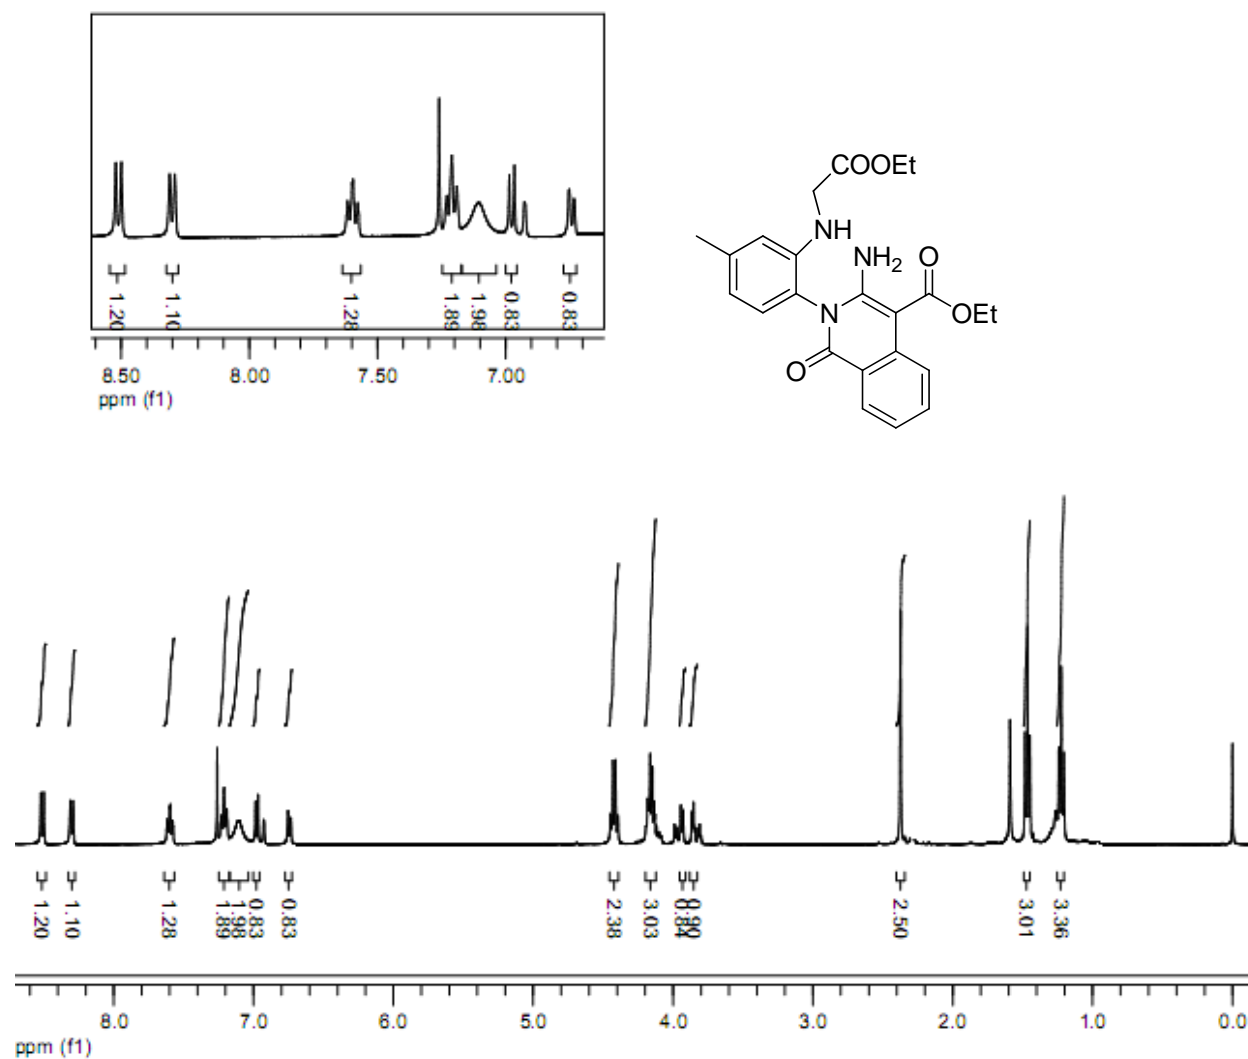

Fig. 51:  $^1\text{H}$  NMR spectra of compound **3u** ( $\text{CDCl}_3$ , 400 MHz)

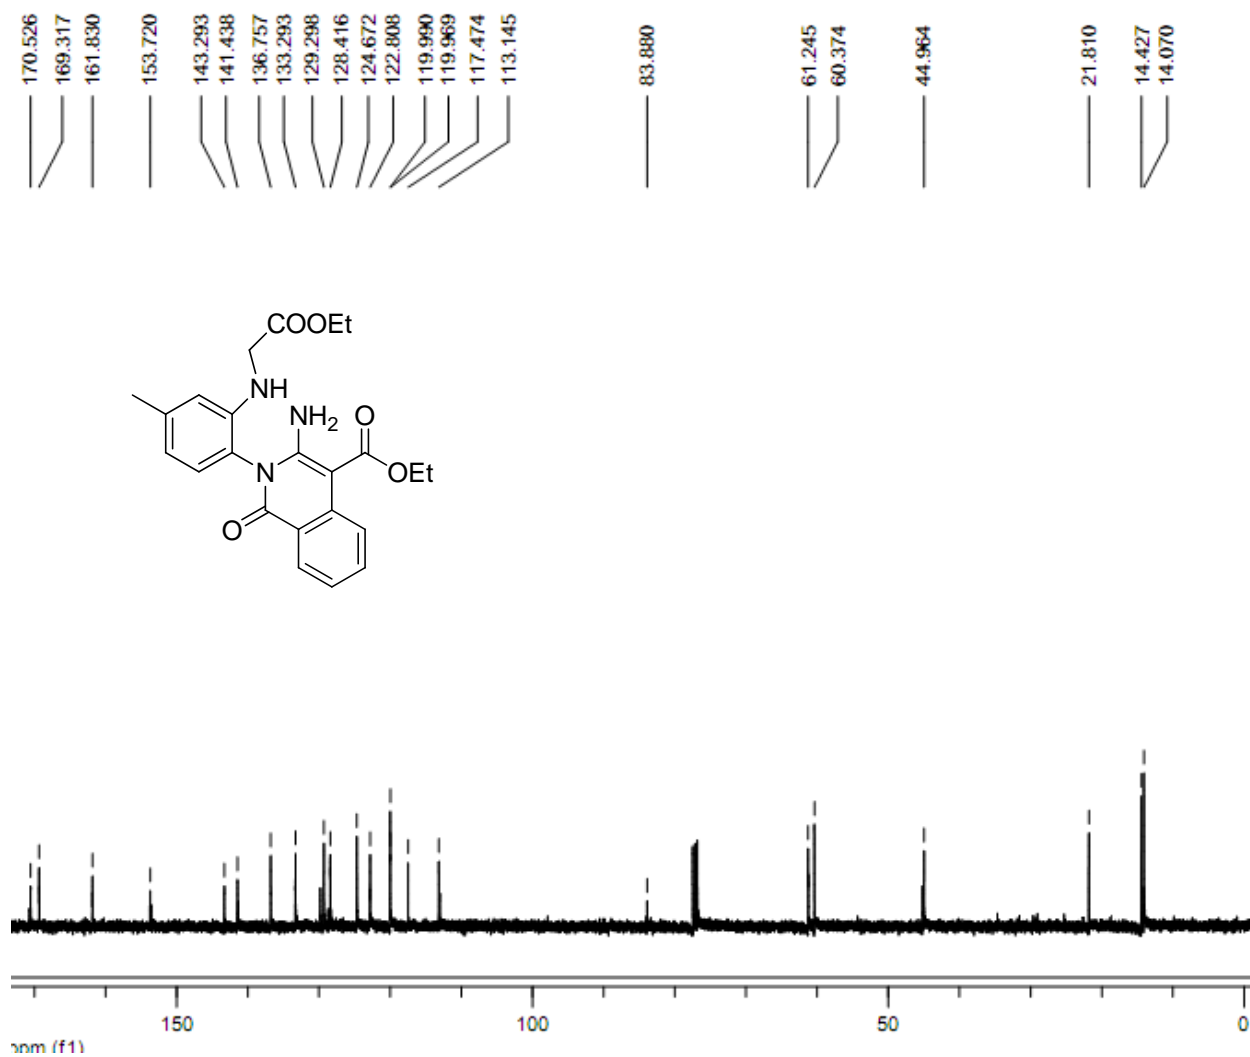

Fig. 52: <sup>13</sup>C NMR spectra of compound **3u** (CDCl<sub>3</sub>, 100 MHz)

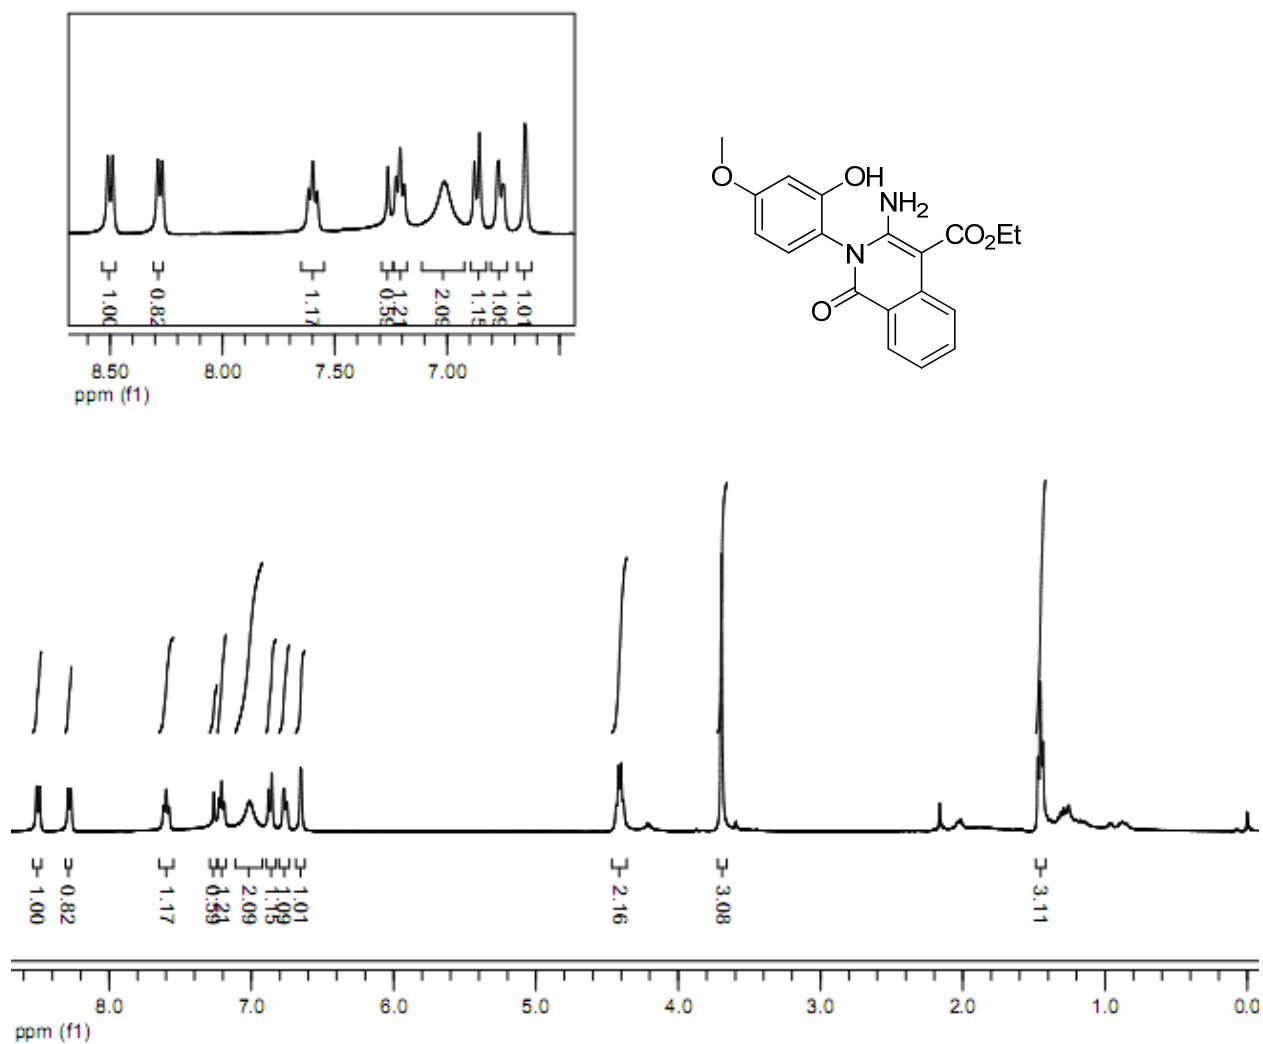

Fig. 53:  $^1\text{H}$  NMR spectra of compound **3v** ( $\text{CDCl}_3$ , 400 MHz)

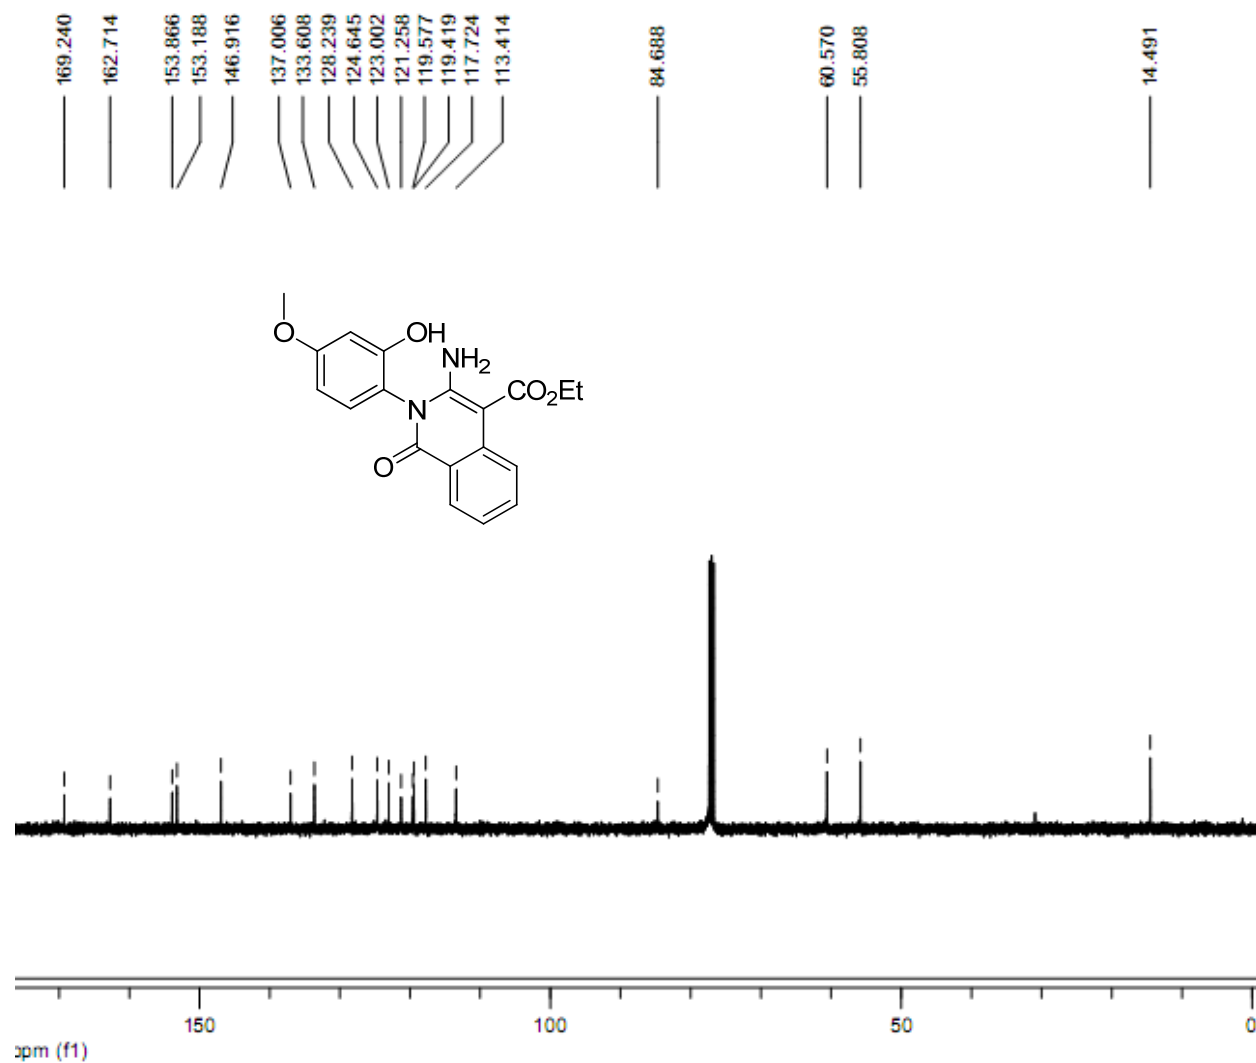

Fig. 54: <sup>13</sup>C NMR spectra of compound **3v** (CDCl<sub>3</sub>, 100 MHz)

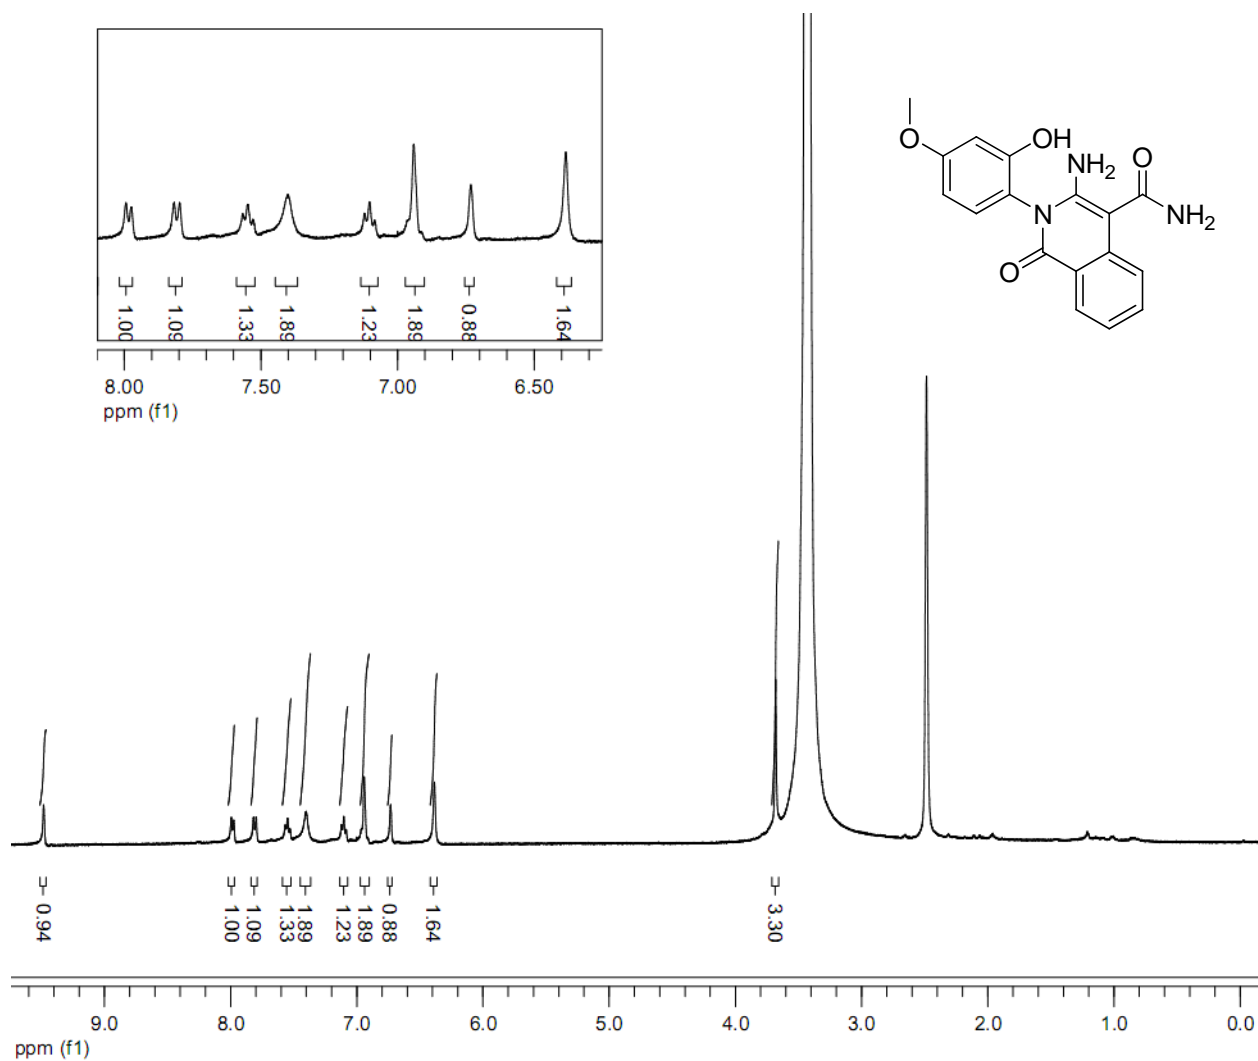

Fig. 55:  $^1\text{H}$  NMR spectra of compound **3w** ( $\text{DMSO-}d_6$ , 400 MHz)

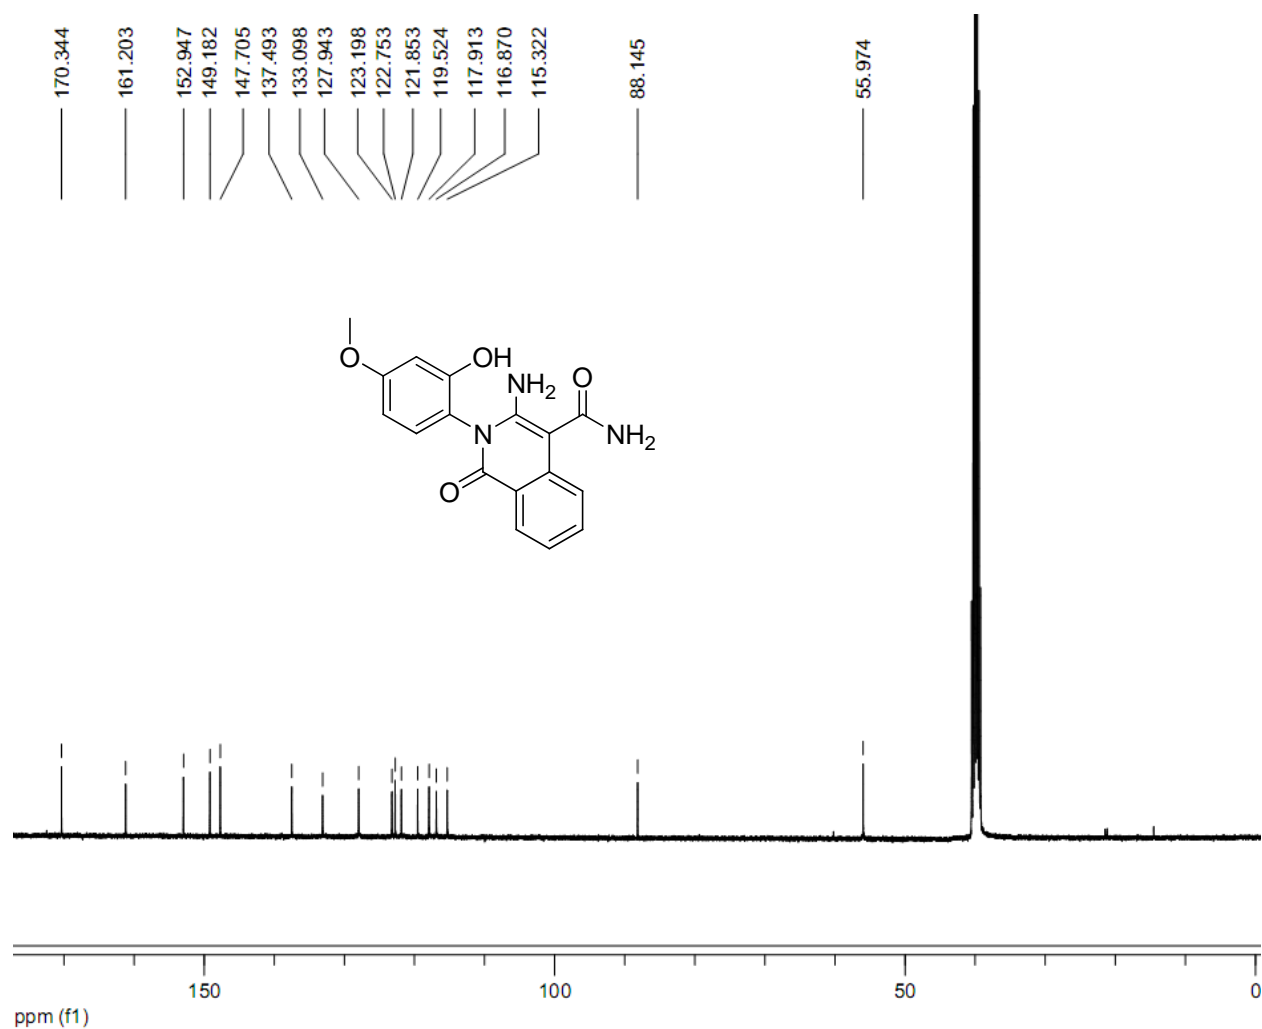

Fig. 56: <sup>13</sup>C NMR spectra of compound **3w** (DMSO-*d*<sub>6</sub>, 100 MHz)



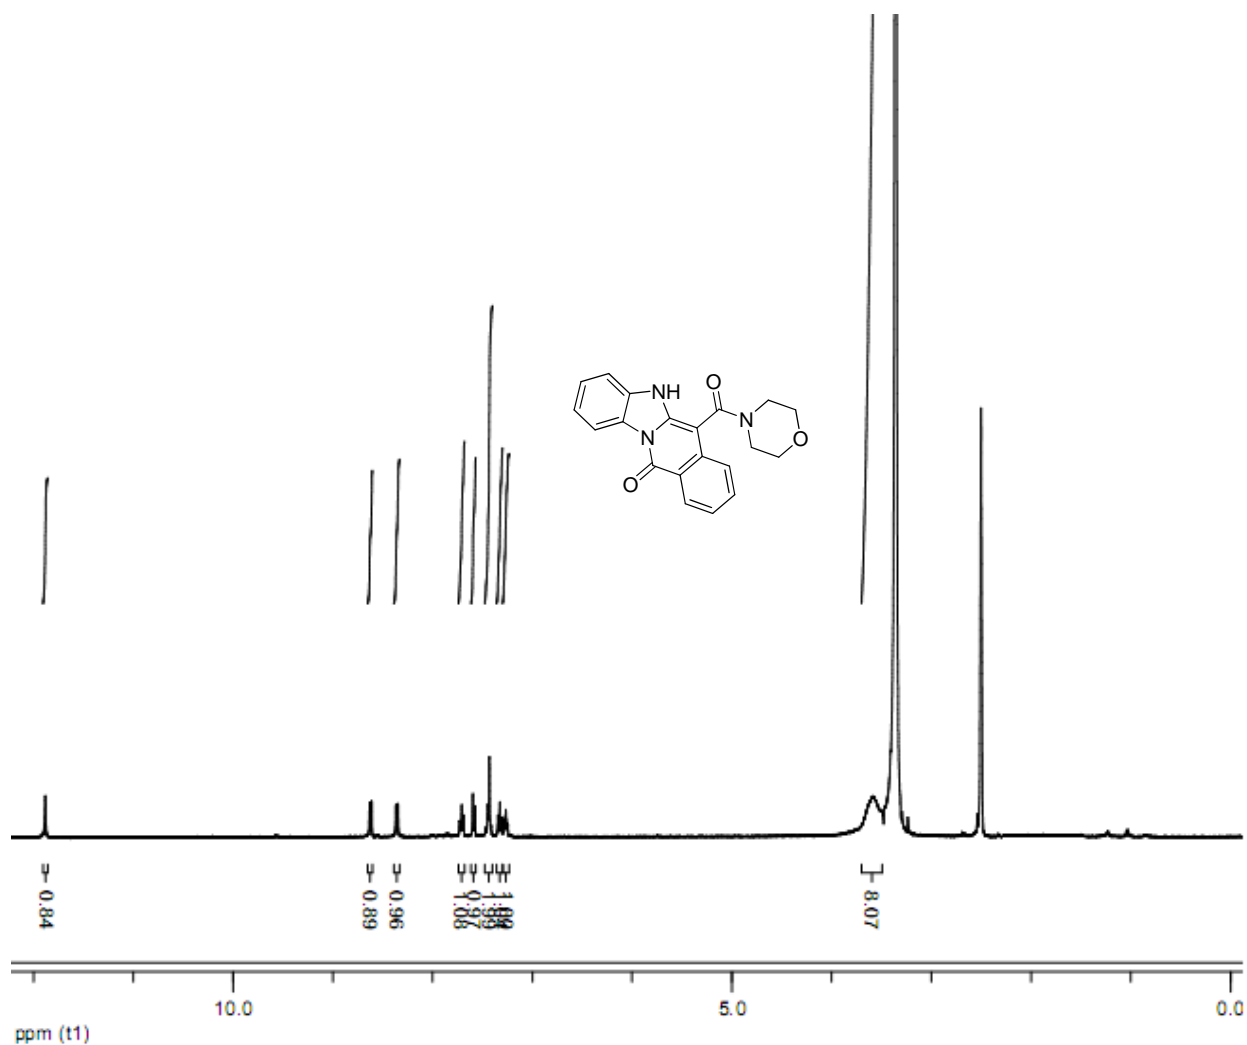

Fig. 57:  $^1\text{H}$  NMR spectra of compound **4d** ( $\text{DMSO}-d_6$ , 400 MHz)

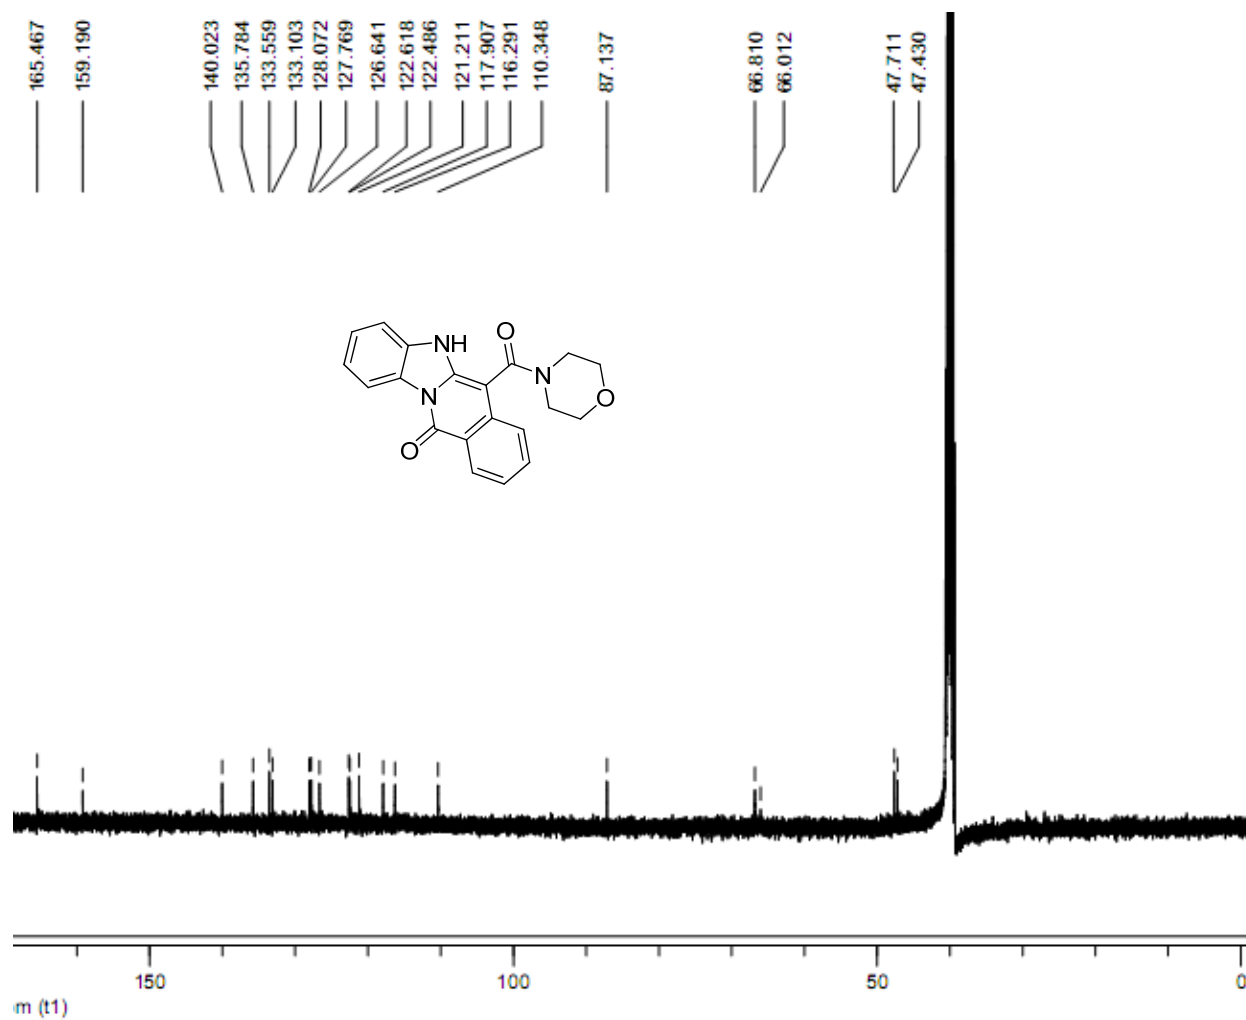

Fig. 58: <sup>13</sup>C NMR spectra of compound **4d** (DMSO-*d*<sub>6</sub>, 100 MHz)

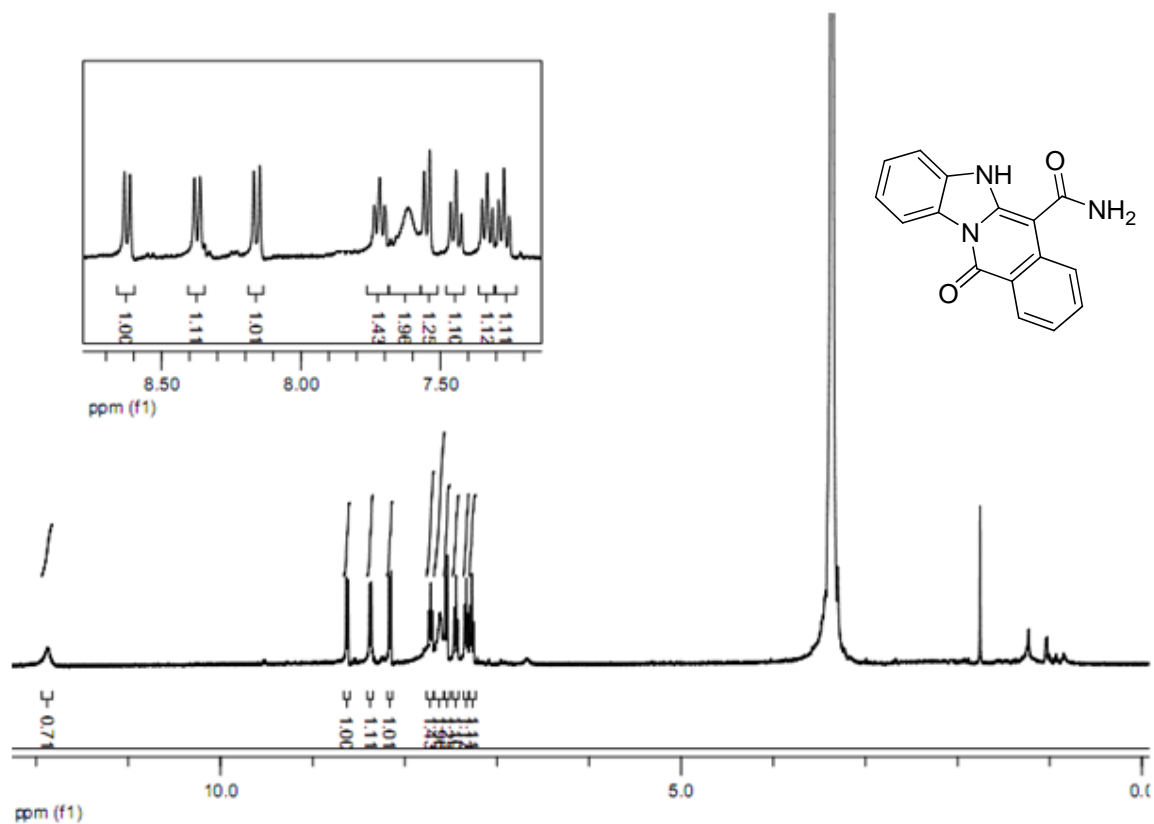

Fig. 59:  $^1\text{H}$  NMR spectra of compound **4e** ( $\text{DMSO}-d_6$ , 400 MHz)

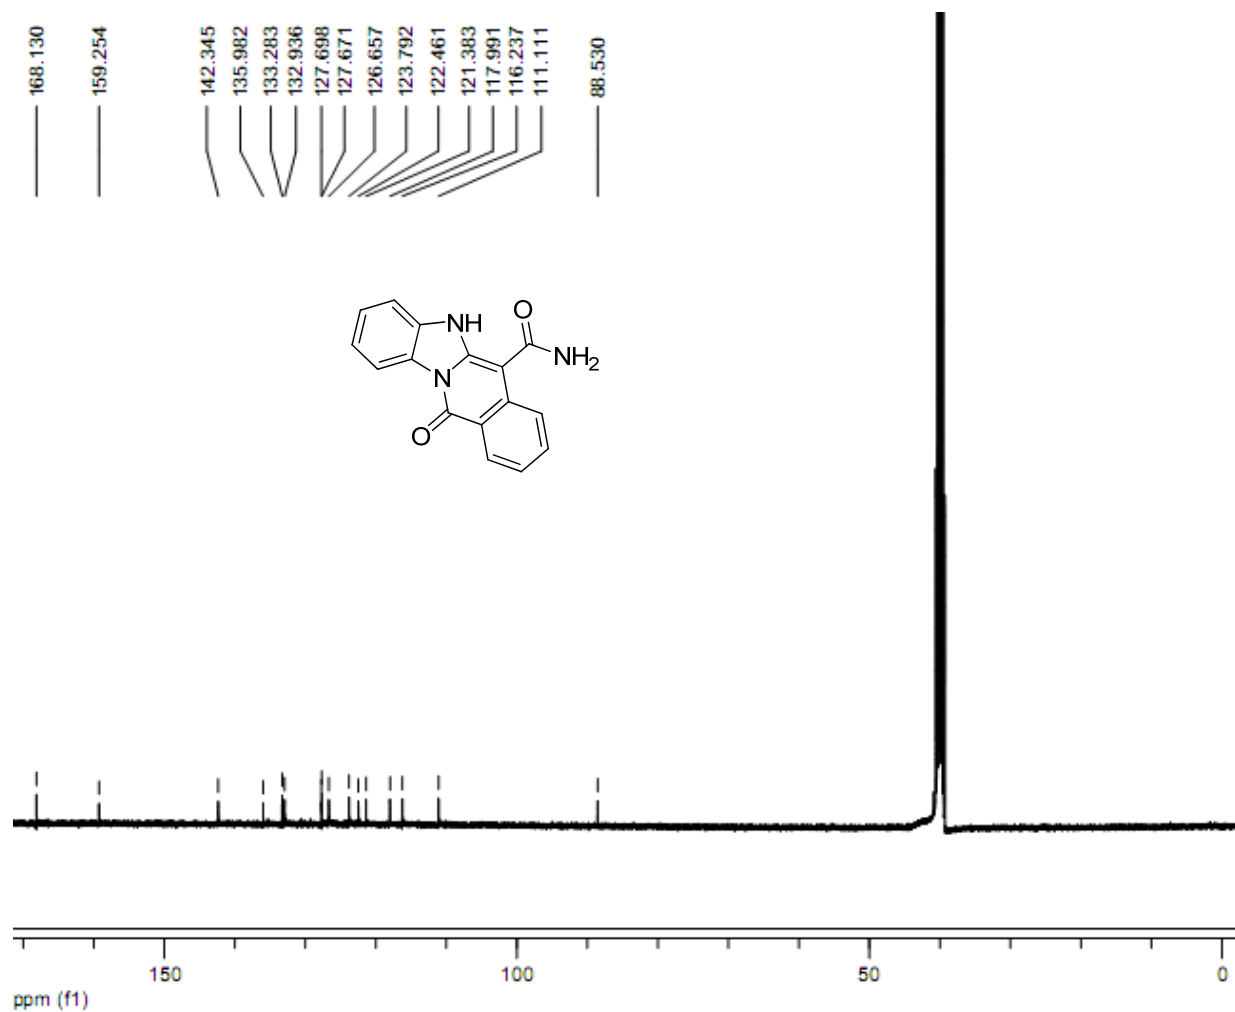

Fig. 60: <sup>13</sup>C NMR spectra of compound **4e** (DMSO-*d*<sub>6</sub>, 100 MHz)

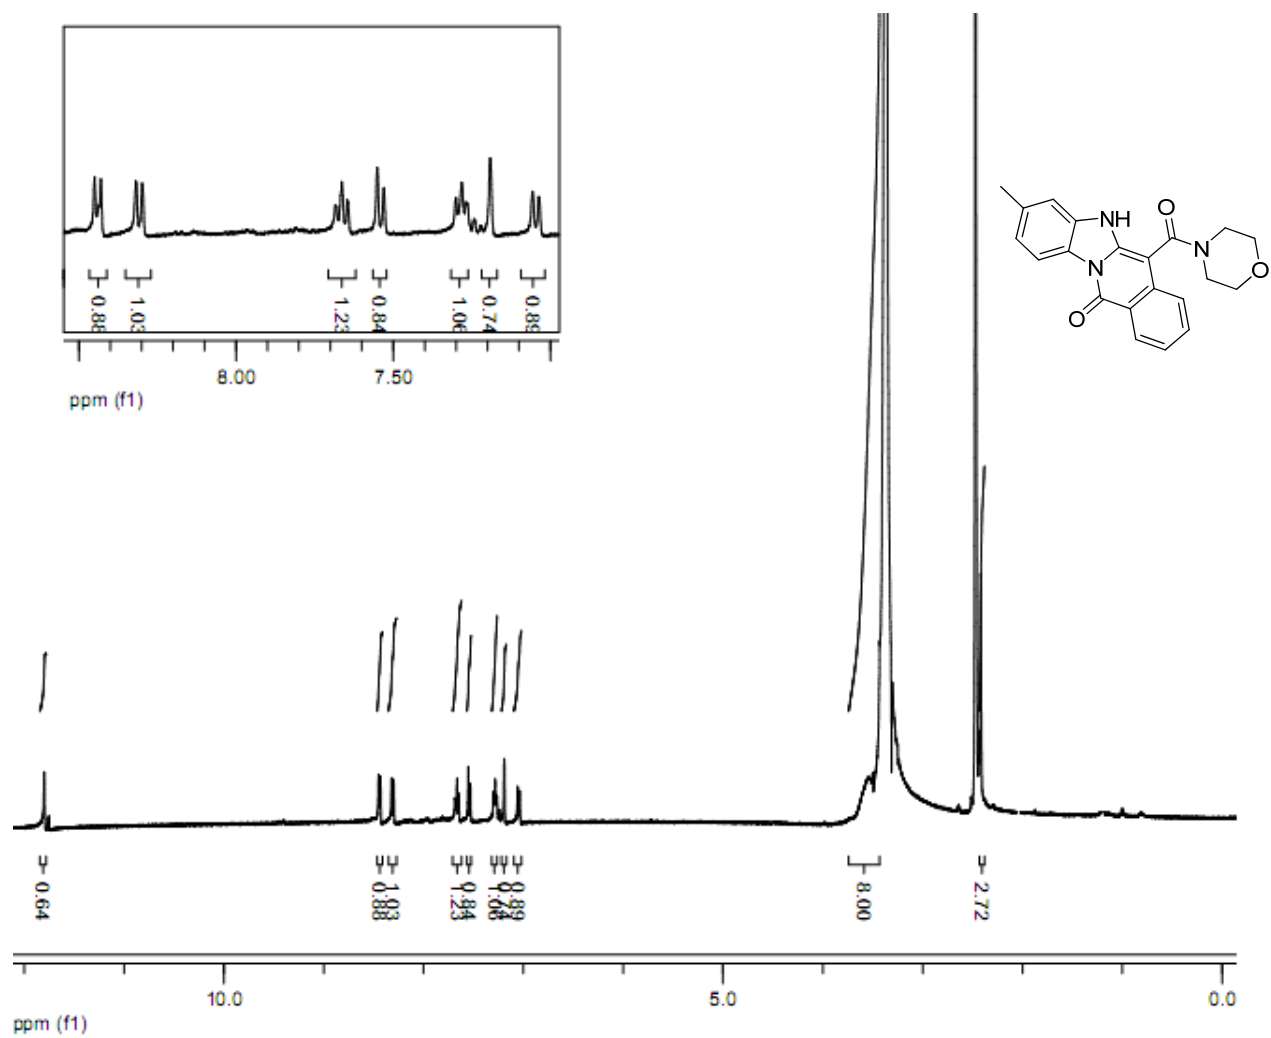

Fig. 61:  $^1\text{H}$  NMR spectra of compound **4i** ( $\text{DMSO}-d_6$ , 400 MHz)

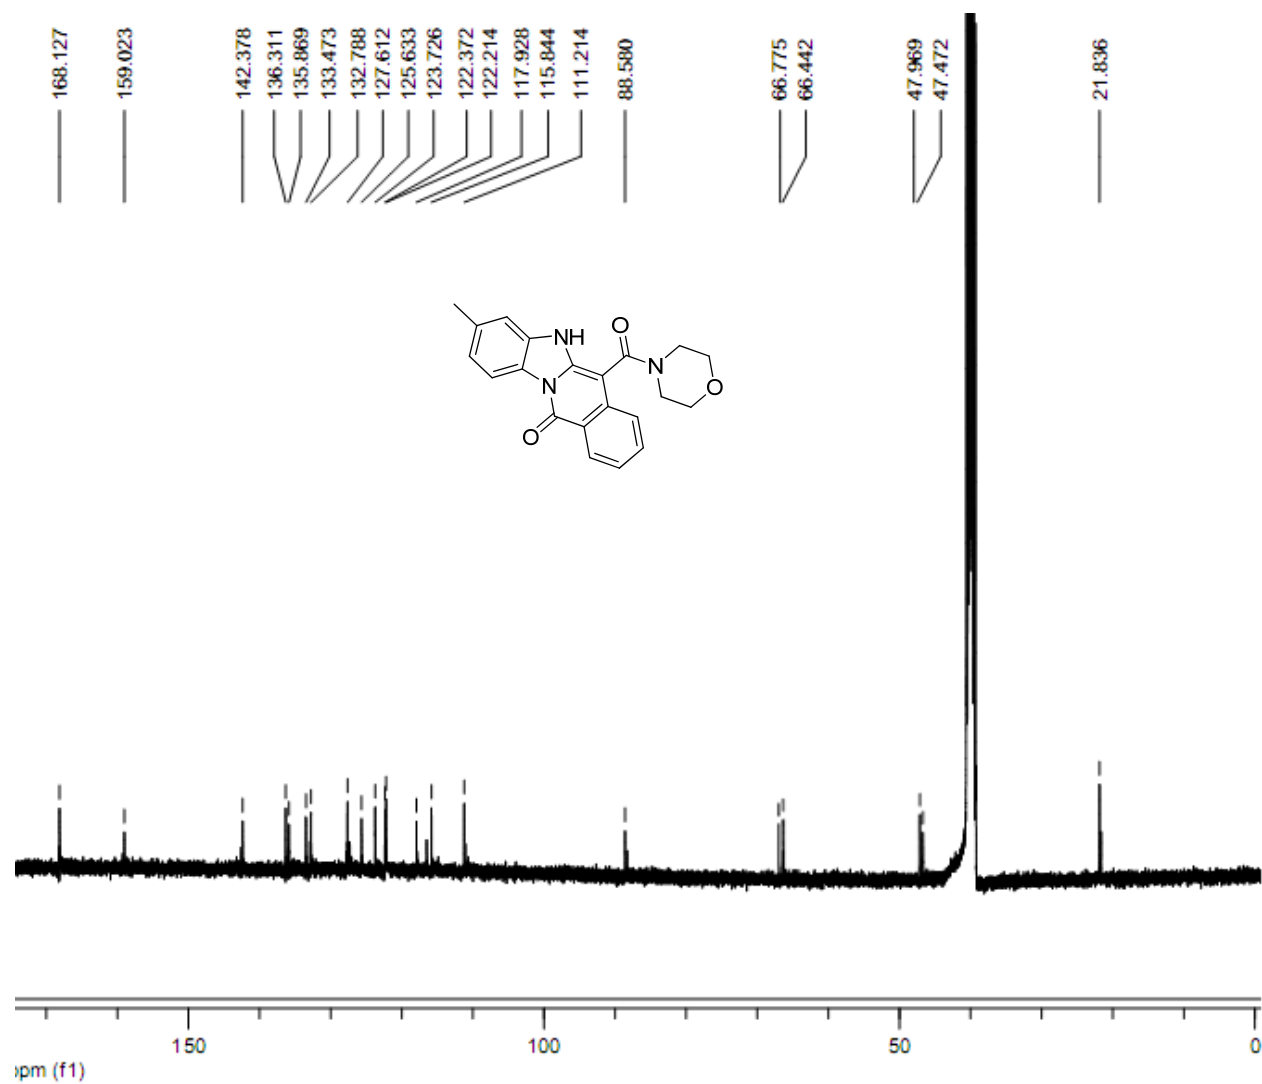

Fig. 62: <sup>13</sup>C NMR spectra of compound **4i** (DMSO-*d*<sub>6</sub>, 100 MHz)

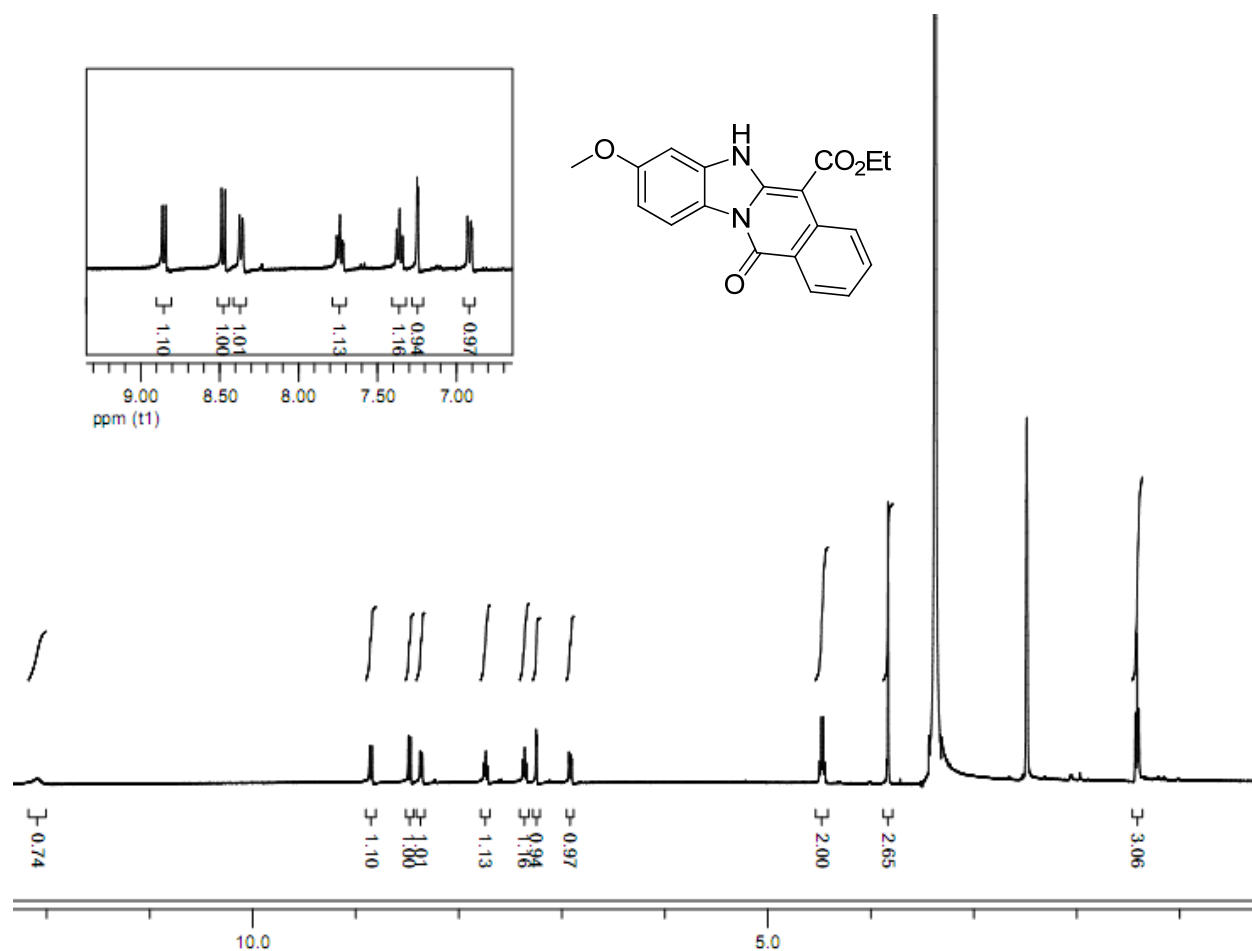

Fig. 63: <sup>1</sup>H NMR spectra of compound **4j** (DMSO-*d*<sub>6</sub>, 400 MHz)

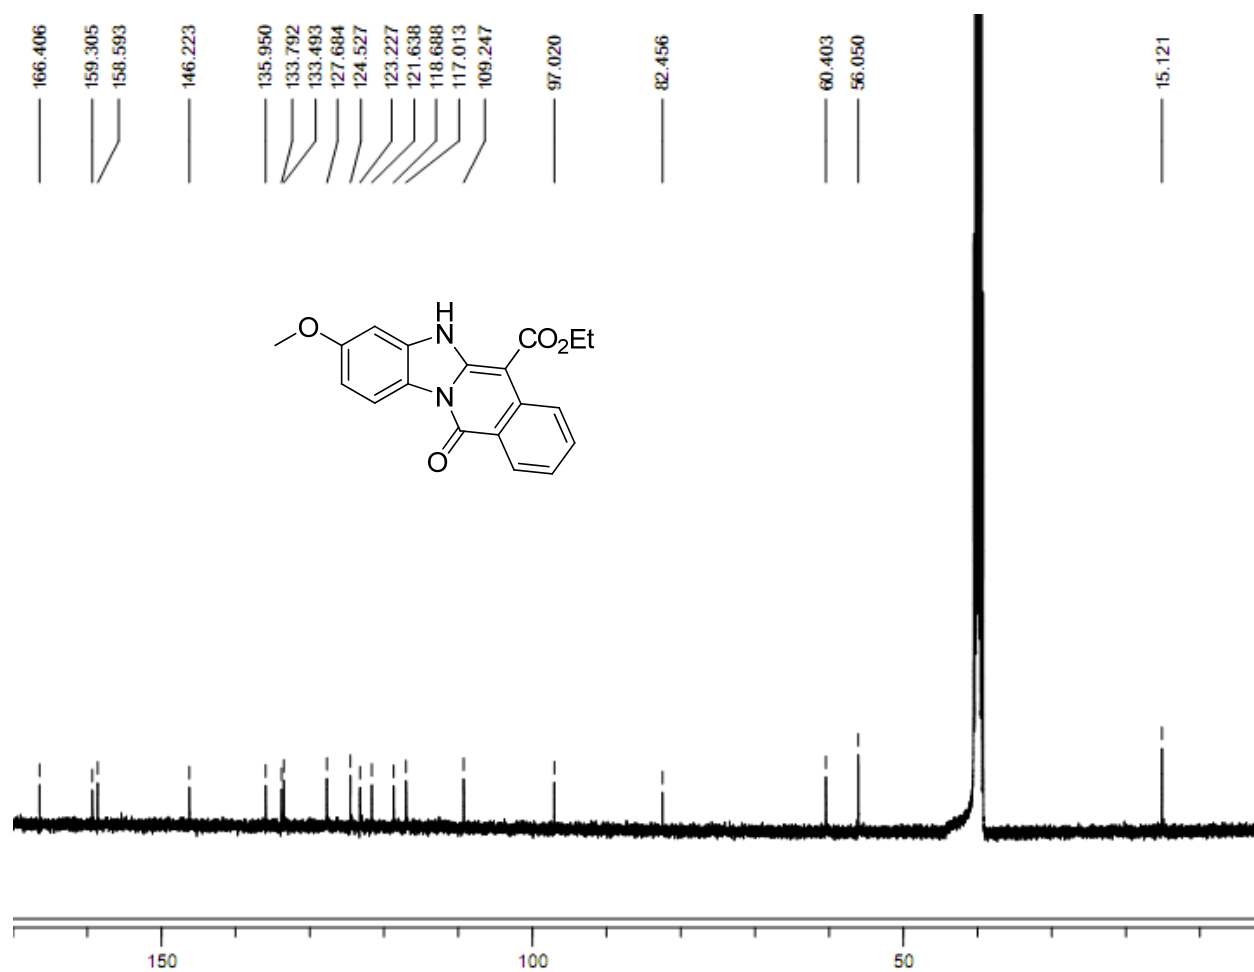

Fig. 64: <sup>13</sup>C NMR spectra of compound **4j** (DMSO-*d*<sub>6</sub>, 100 MHz)



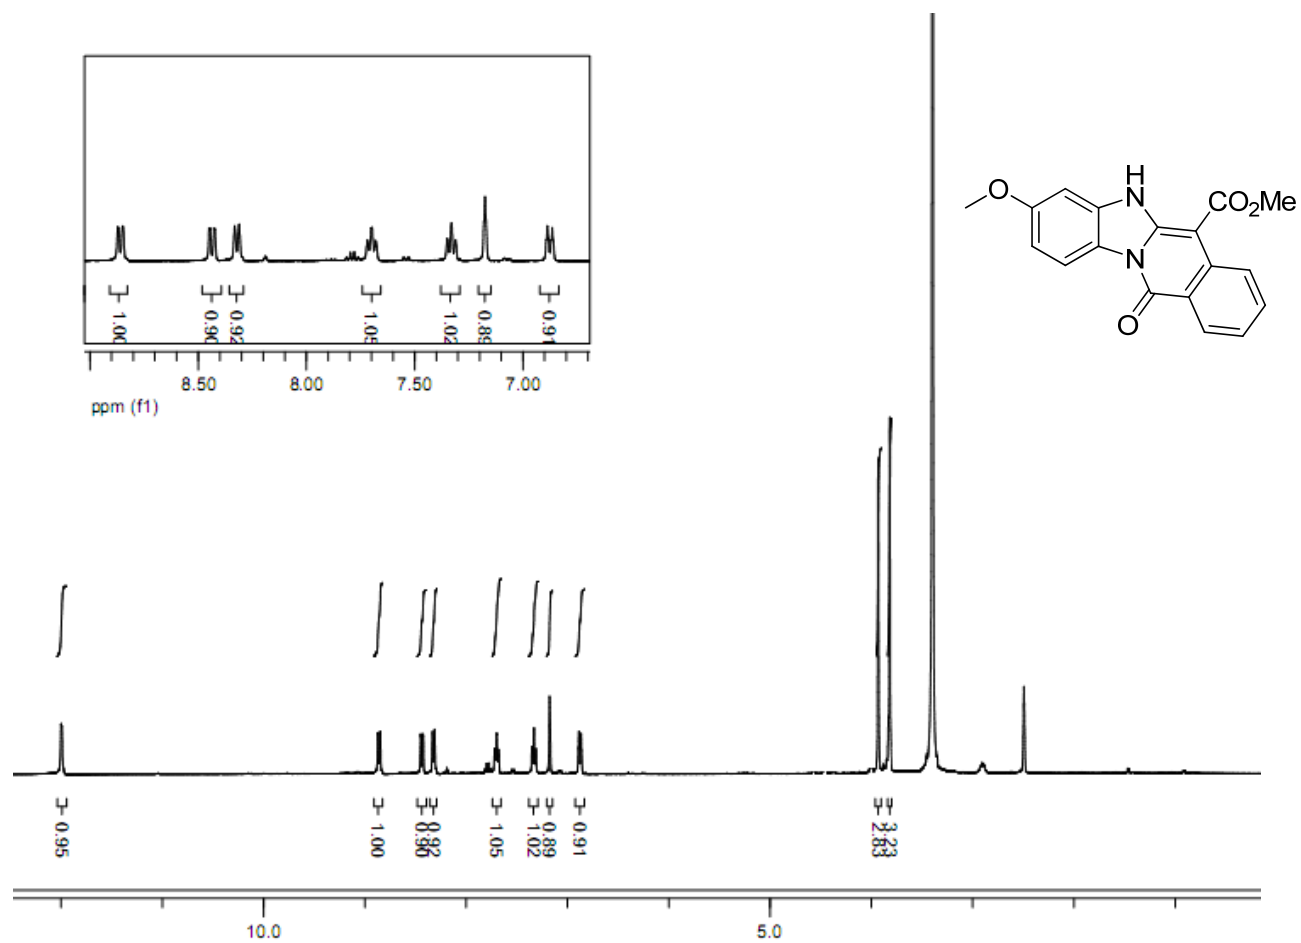

Fig. 65:  $^1\text{H}$  NMR spectra of compound **4k** ( $\text{DMSO-}d_6$ , 400 MHz)

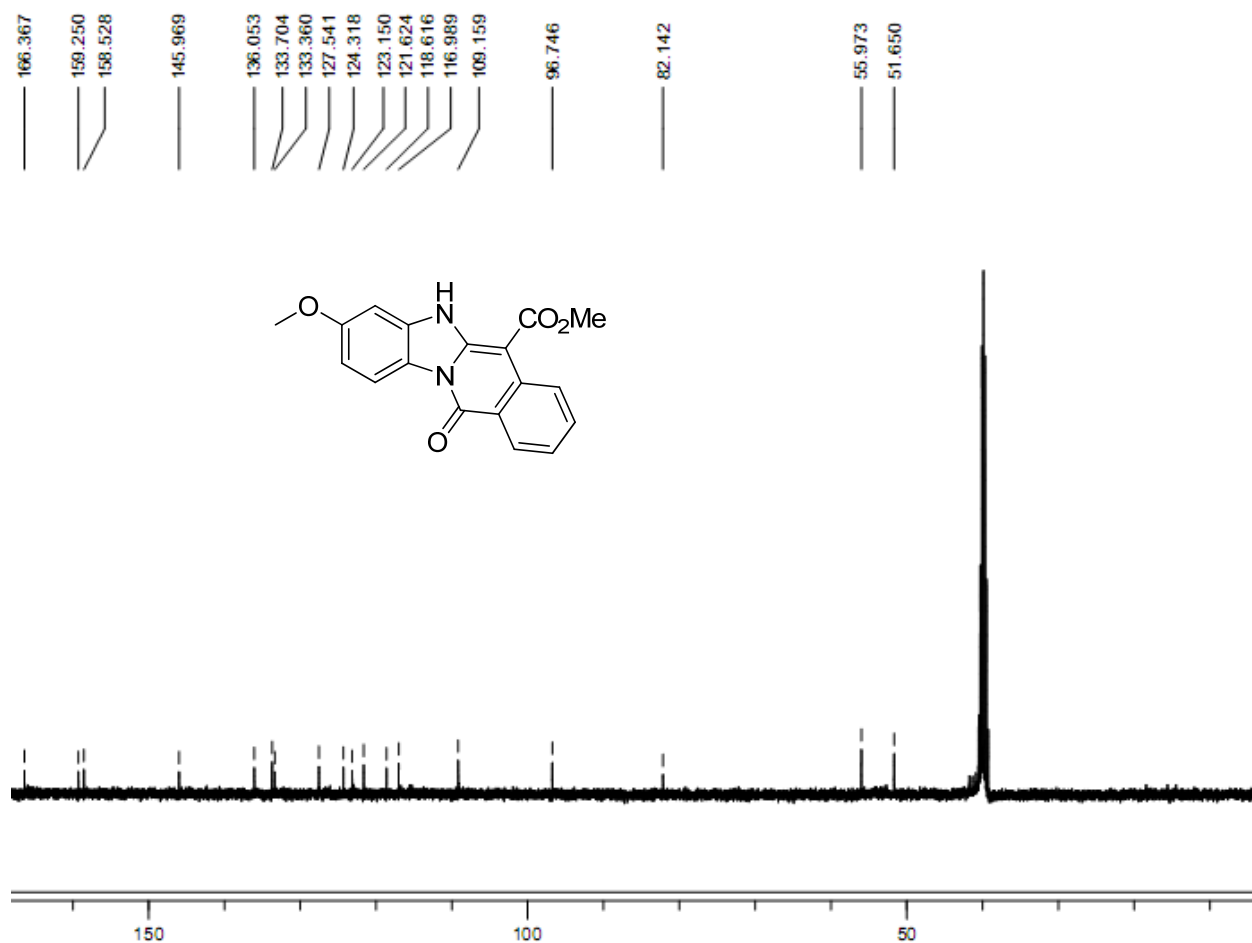

Fig. 66: <sup>13</sup>C NMR spectra of compound **4k** (DMSO-*d*<sub>6</sub>, 100 MHz)

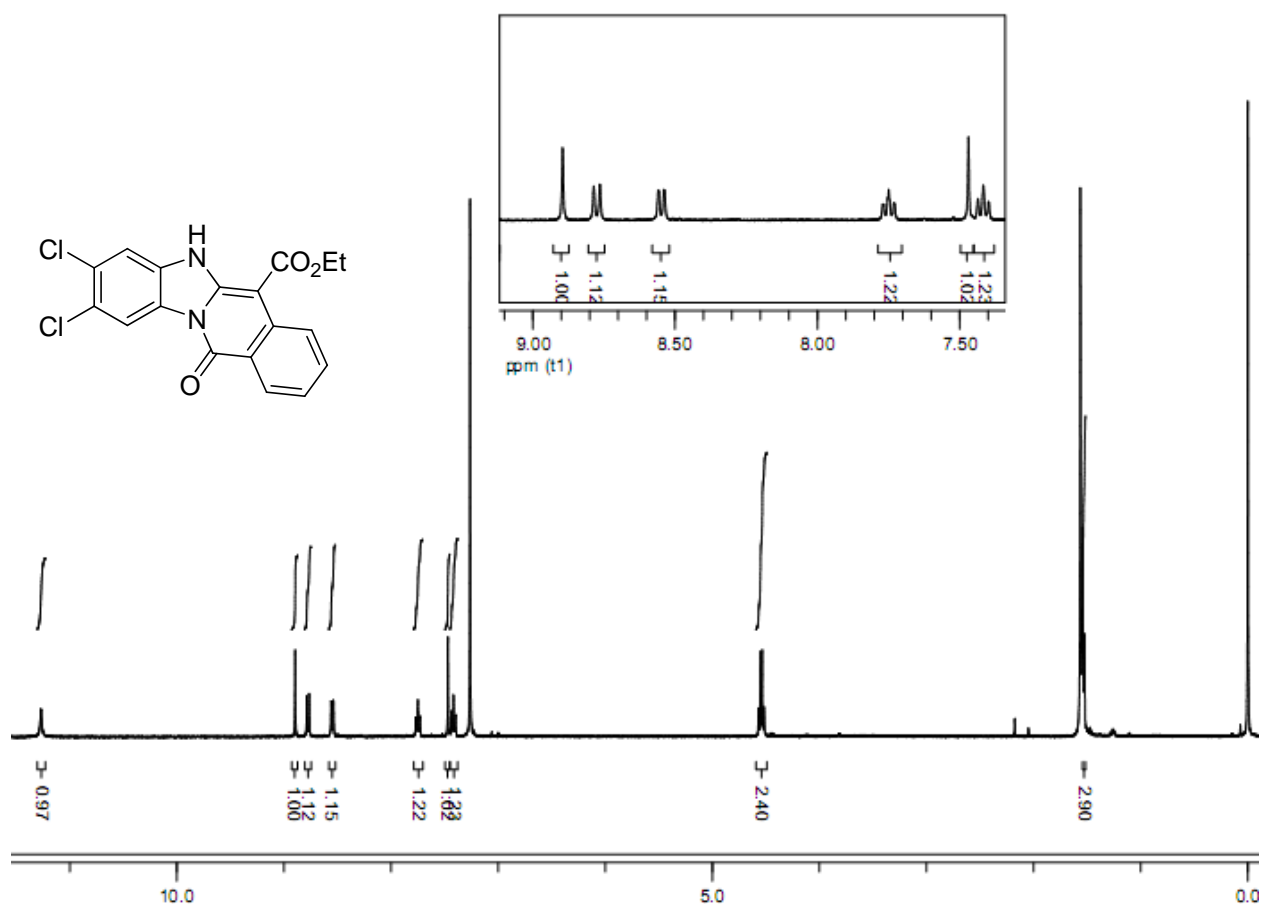

Fig. 67:  $^1\text{H}$  NMR spectra of compound **41** ( $\text{CDCl}_3$ , 400 MHz)

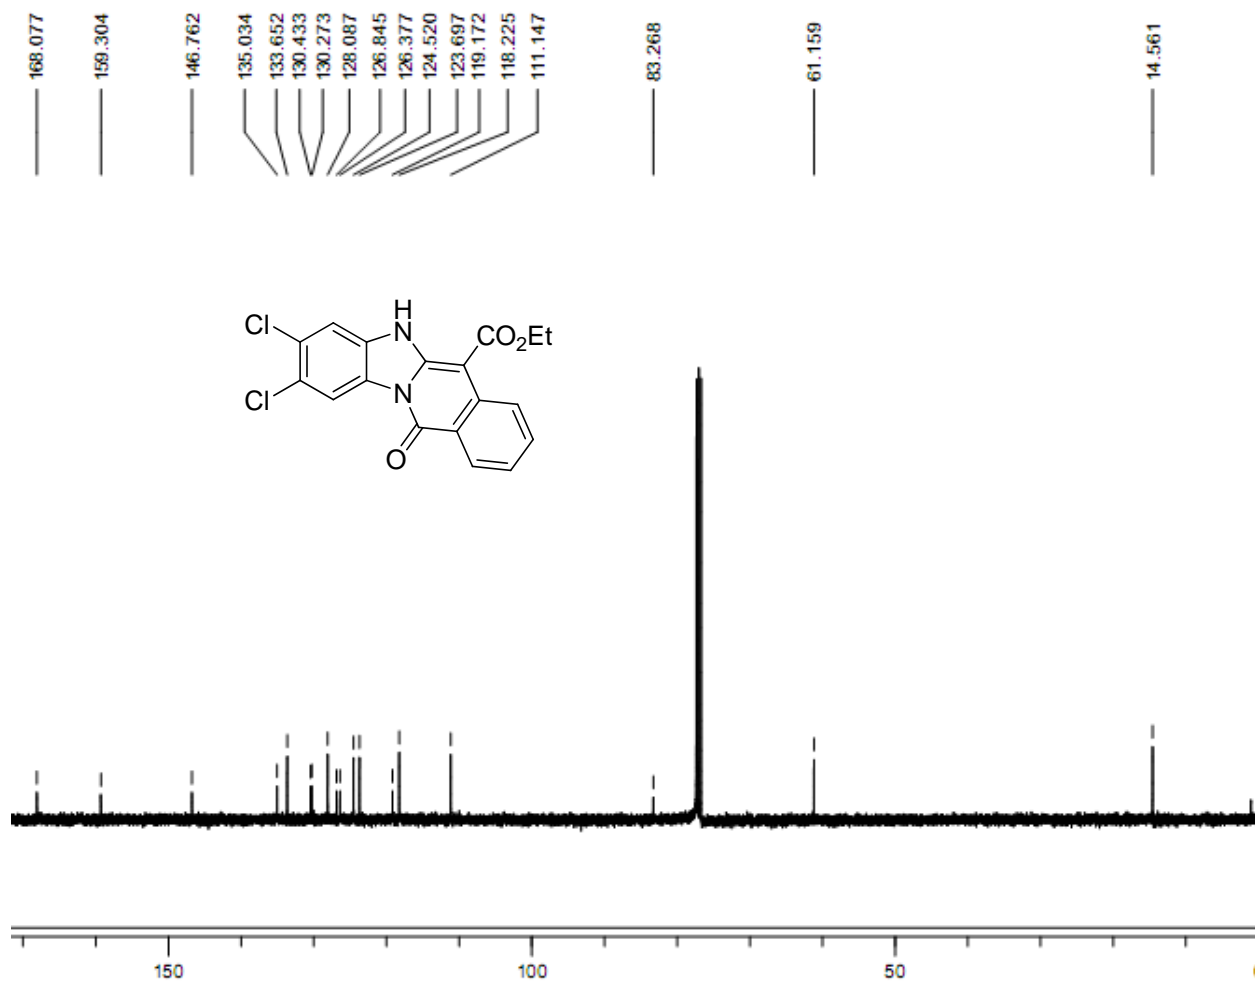

Fig. 68: <sup>13</sup>C NMR spectra of compound **4l** (CDCl<sub>3</sub>, 100 MHz)

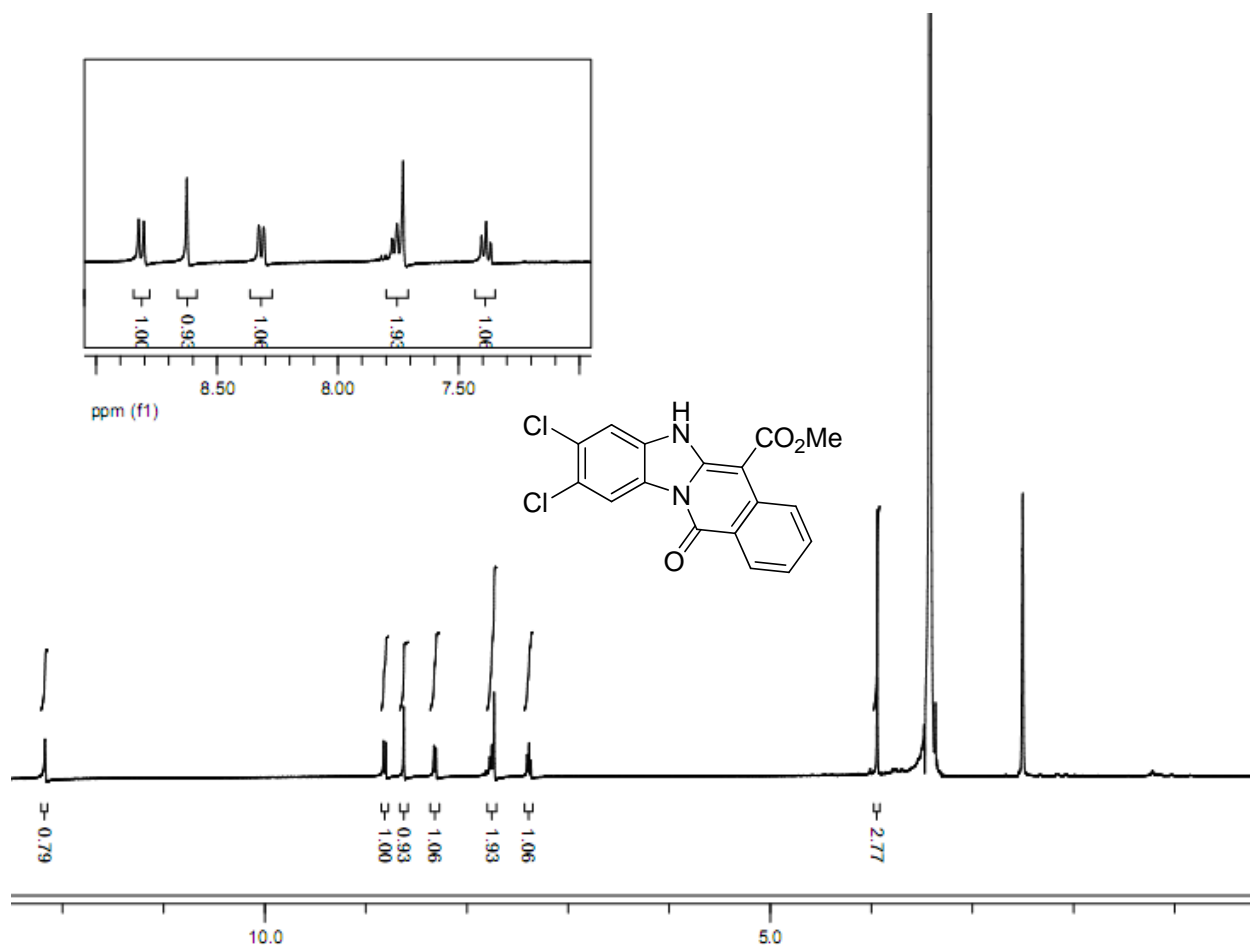

Fig. 69:  $^1\text{H}$  NMR spectra of compound **4m** ( $\text{DMSO-}d_6$ , 400 MHz)

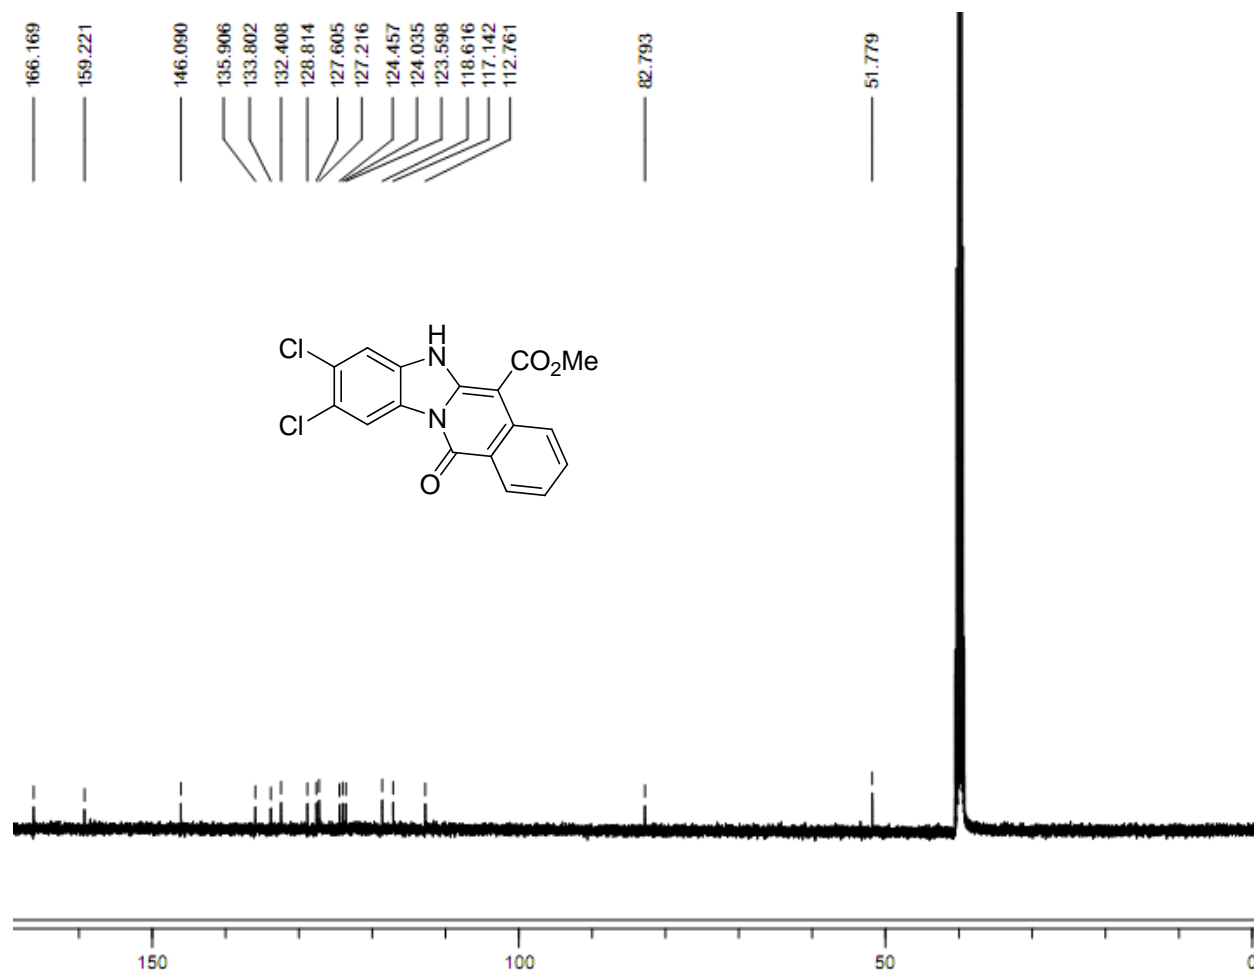

Fig. 70: <sup>13</sup>C NMR spectra of compound **4m** (DMSO-*d*<sub>6</sub>, 100 MHz)

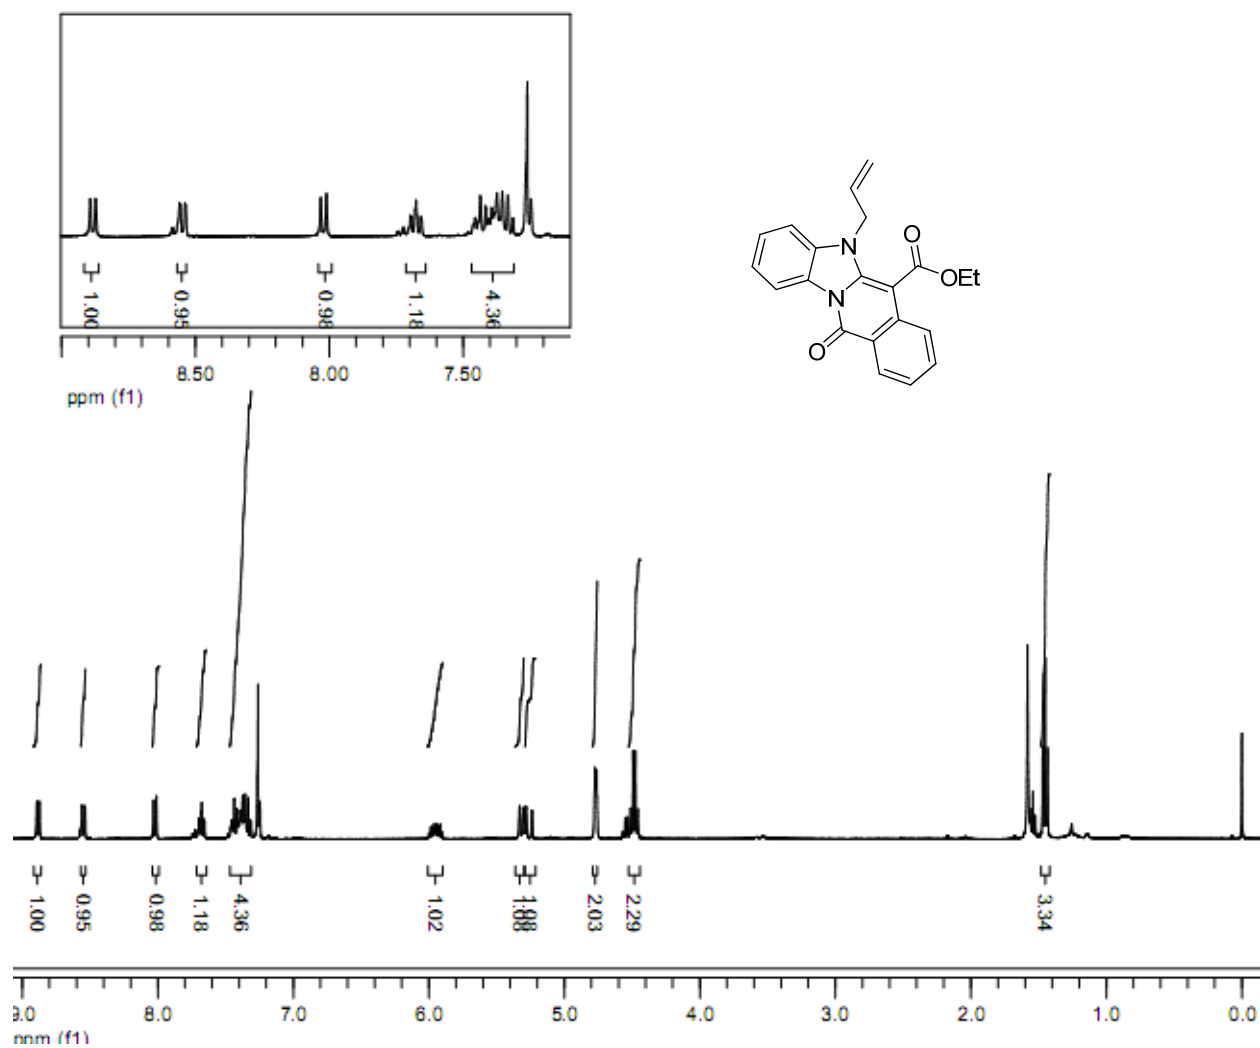

Fig. 71:  $^1\text{H}$  NMR spectra of compound **4n** ( $\text{CDCl}_3$ , 400 MHz)

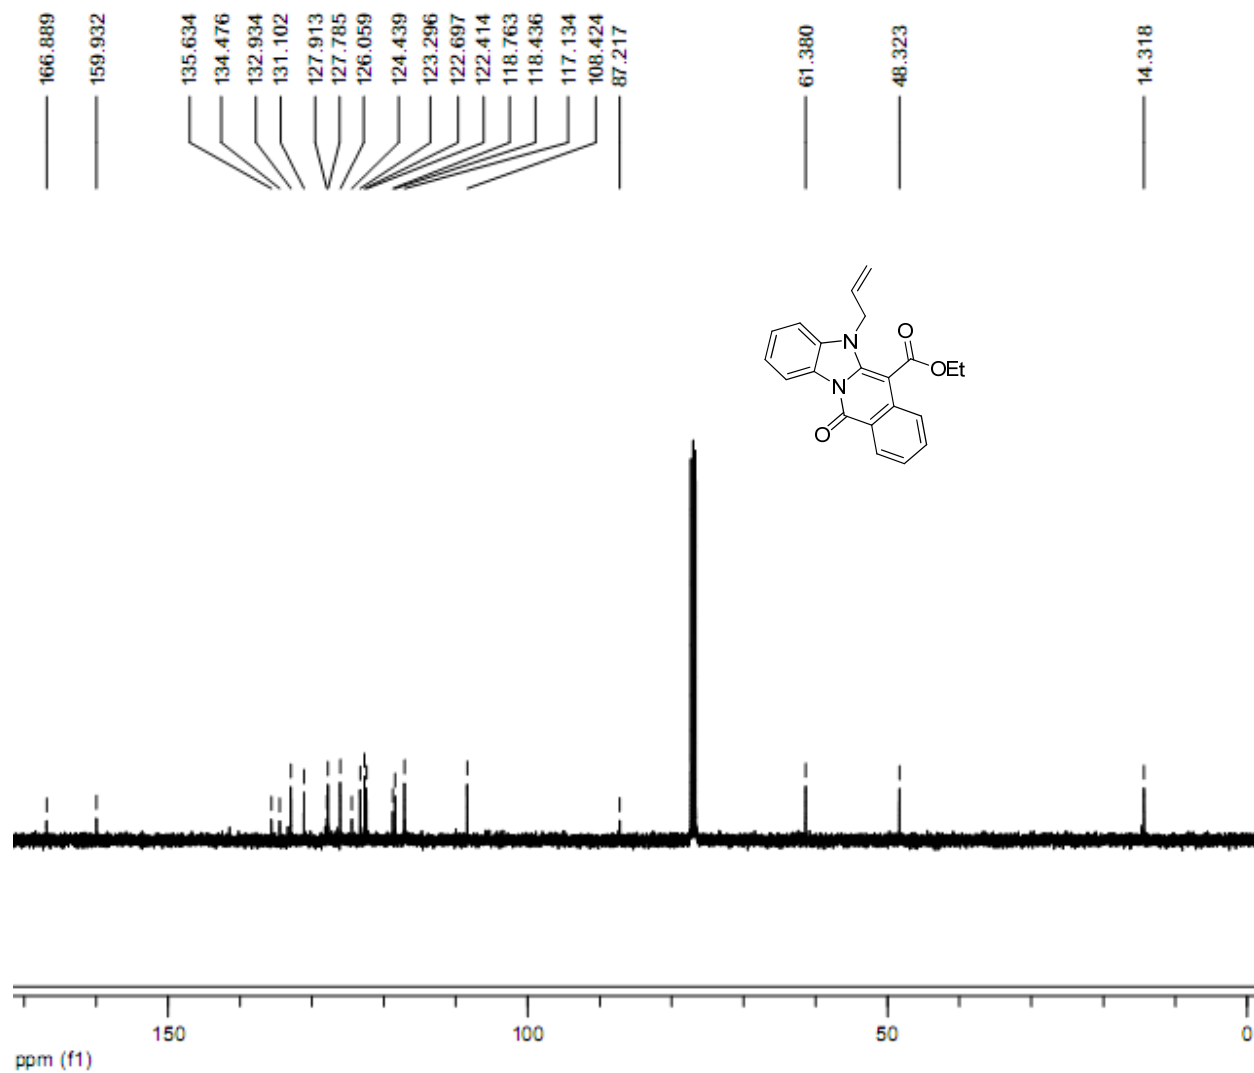

Fig. 72:  $^{13}\text{C}$  NMR spectra of compound **4n** ( $\text{CDCl}_3$ , 100 MHz)



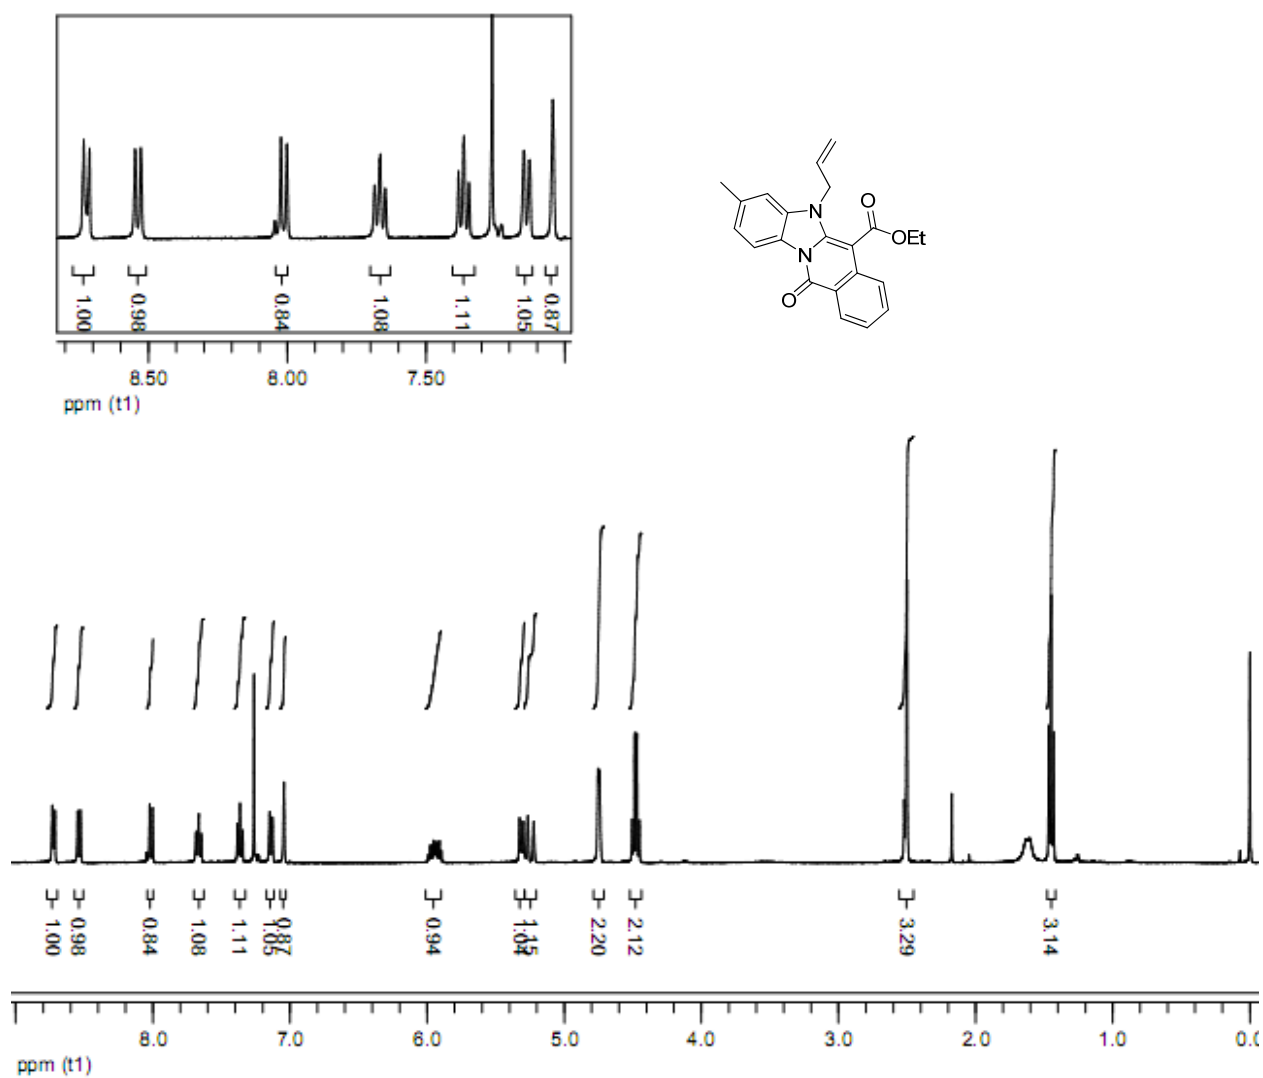

Fig. 73:  $^1\text{H}$  NMR spectra of compound **4o** ( $\text{CDCl}_3$ , 400 MHz)

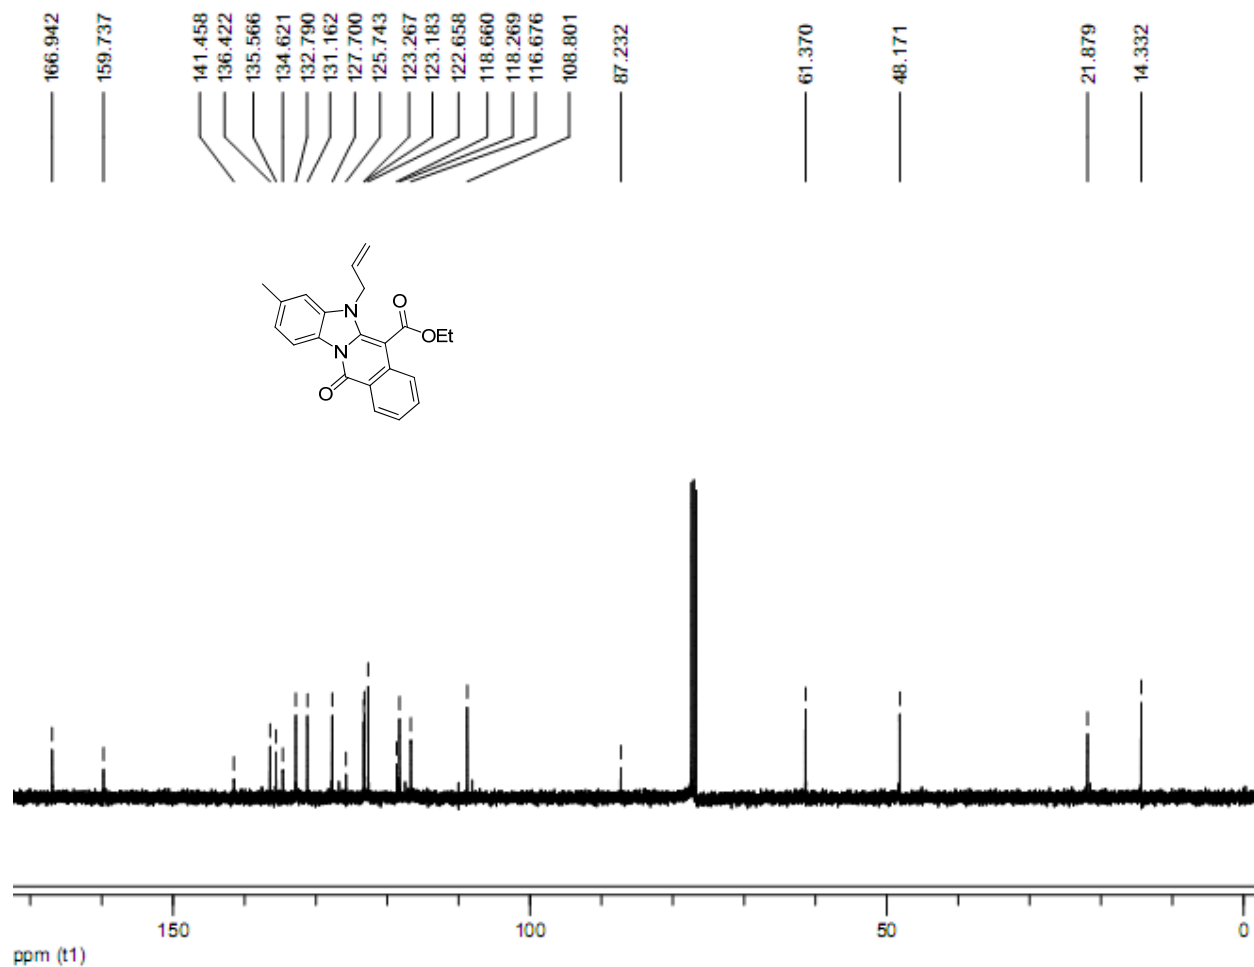

Fig. 74: <sup>13</sup>C NMR spectra of compound **4o** (CDCl<sub>3</sub>, 100 MHz)

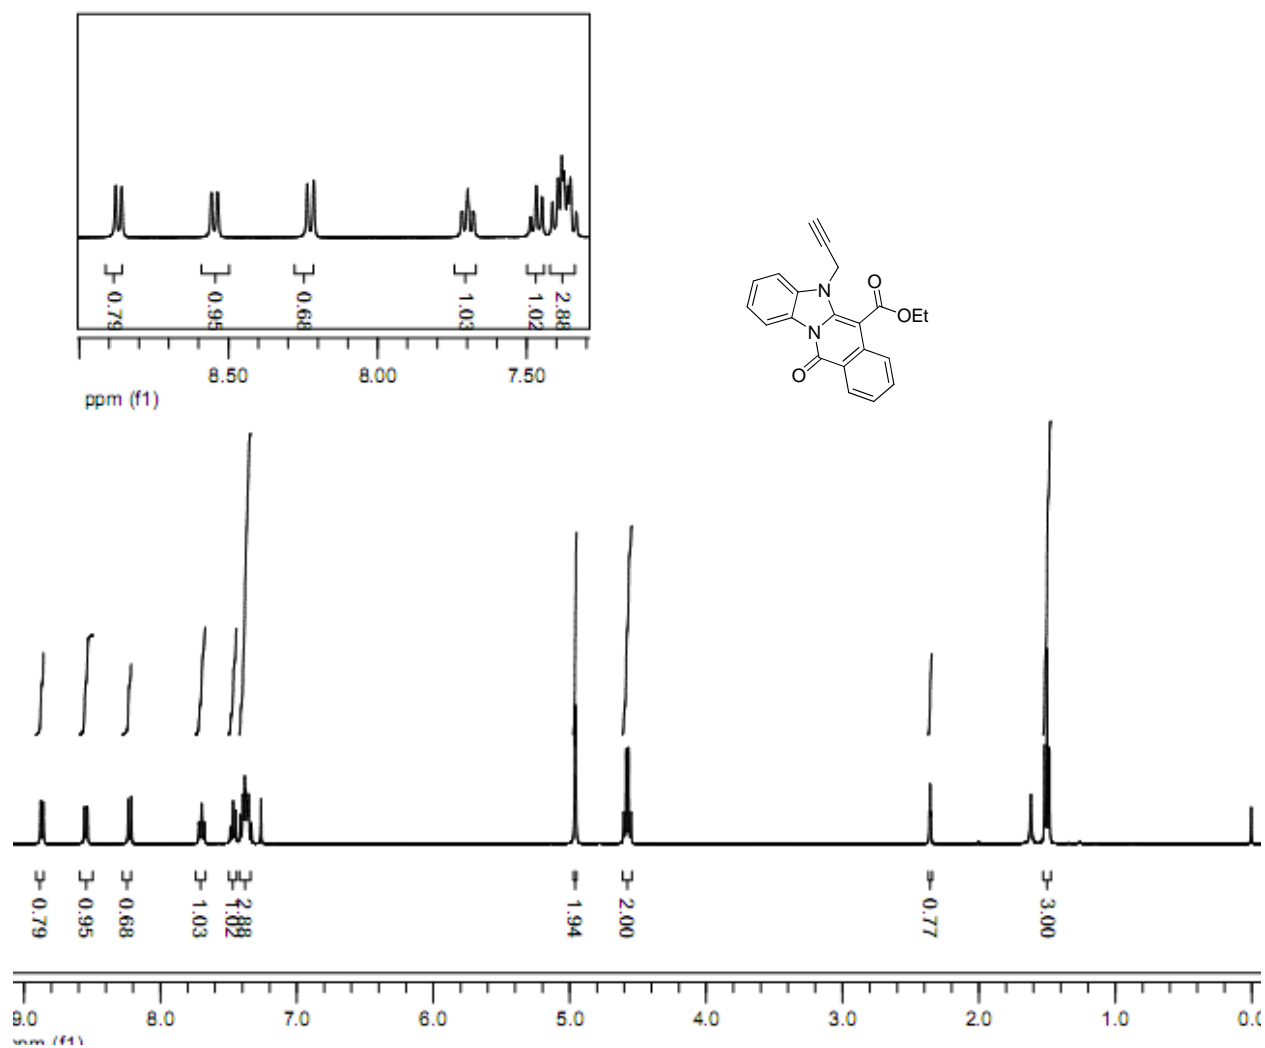

Fig. 75:  $^1\text{H}$  NMR spectra of compound **4p** ( $\text{CDCl}_3$ , 400 MHz)

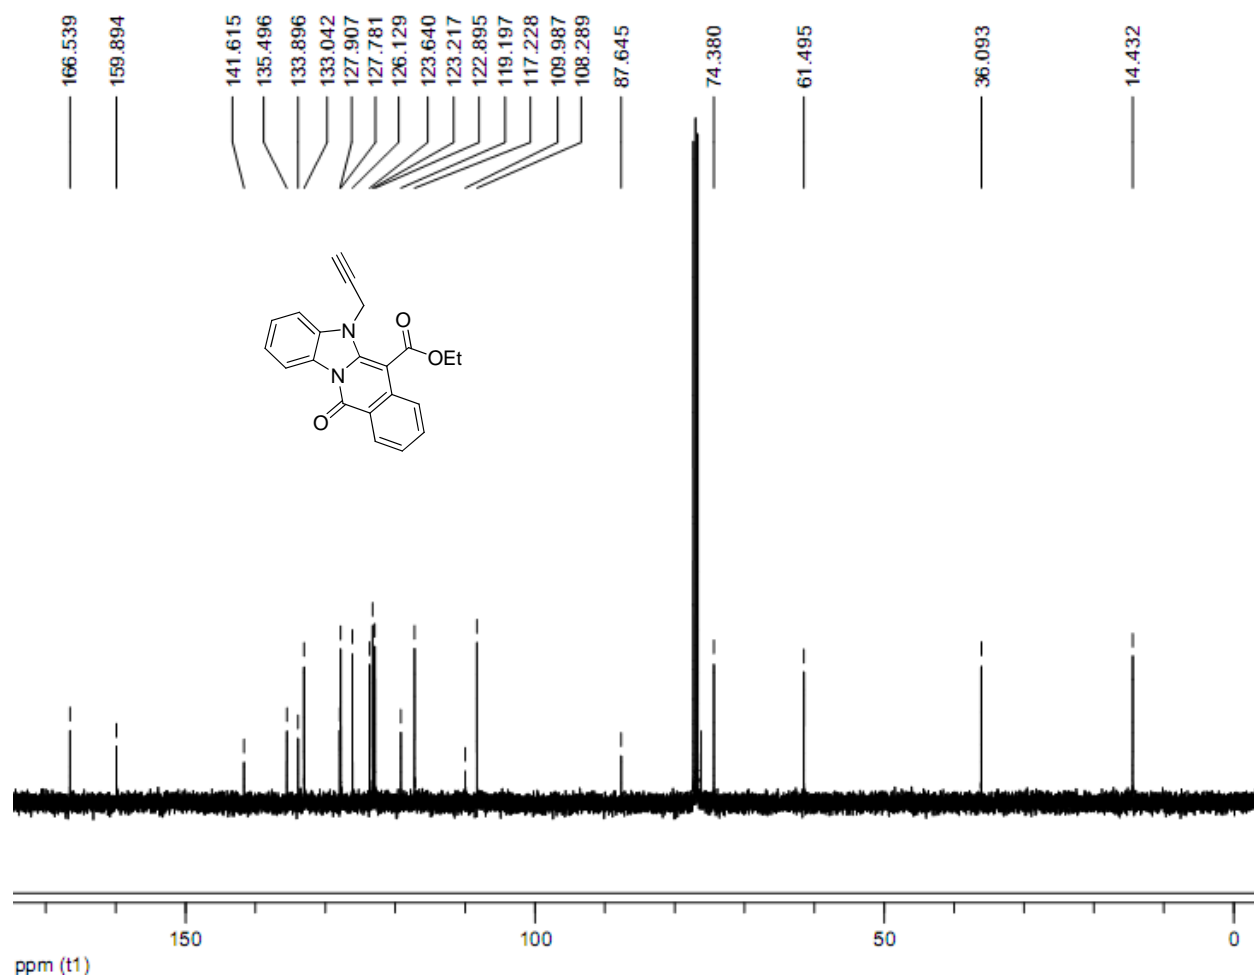

Fig. 76: <sup>13</sup>C NMR spectra of compound **4p** (CDCl<sub>3</sub>, 100 MHz)

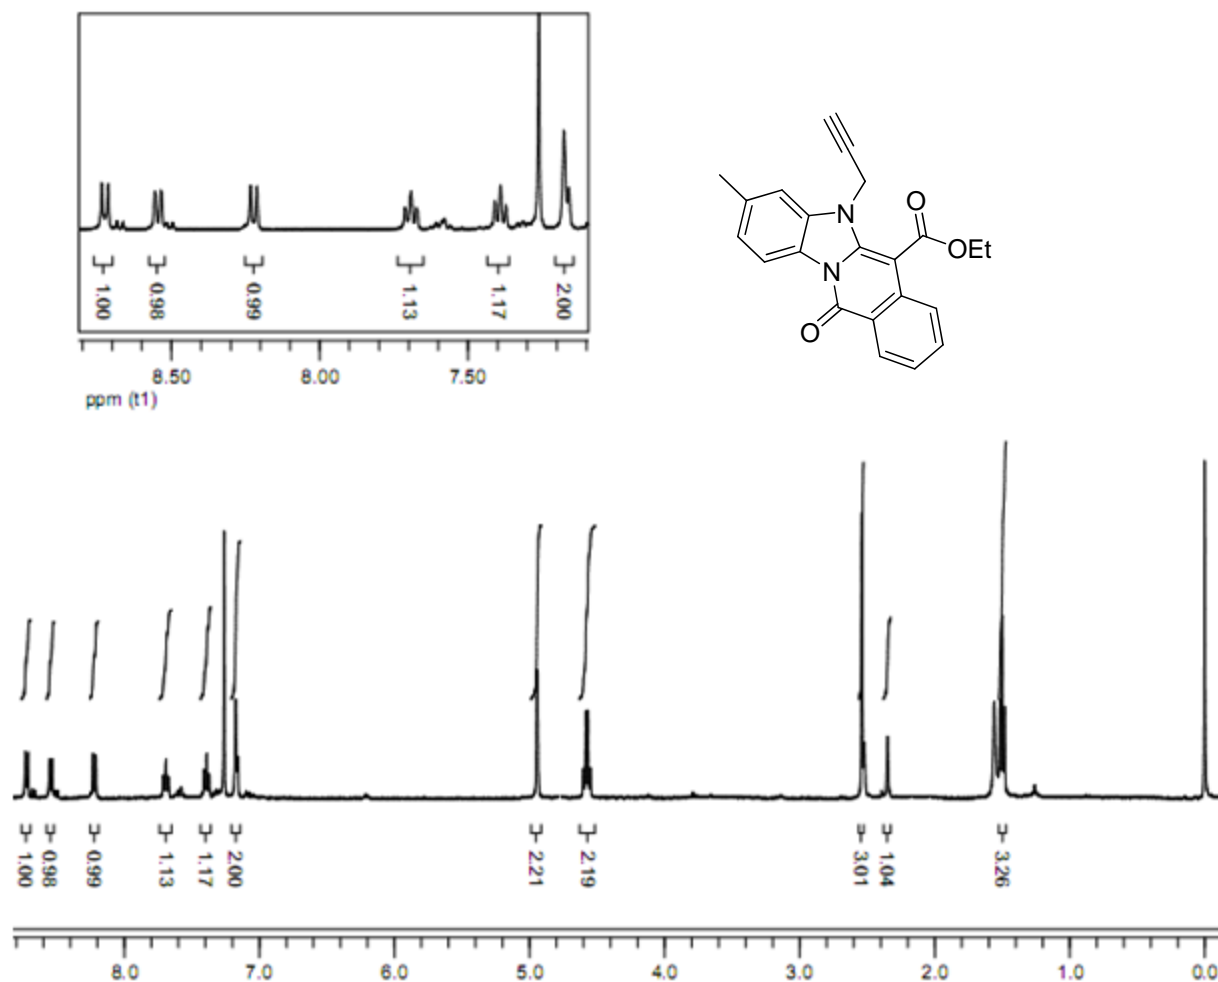

Fig. 77:  $^1\text{H}$  NMR spectra of compound **4q** ( $\text{CDCl}_3$ , 400 MHz)

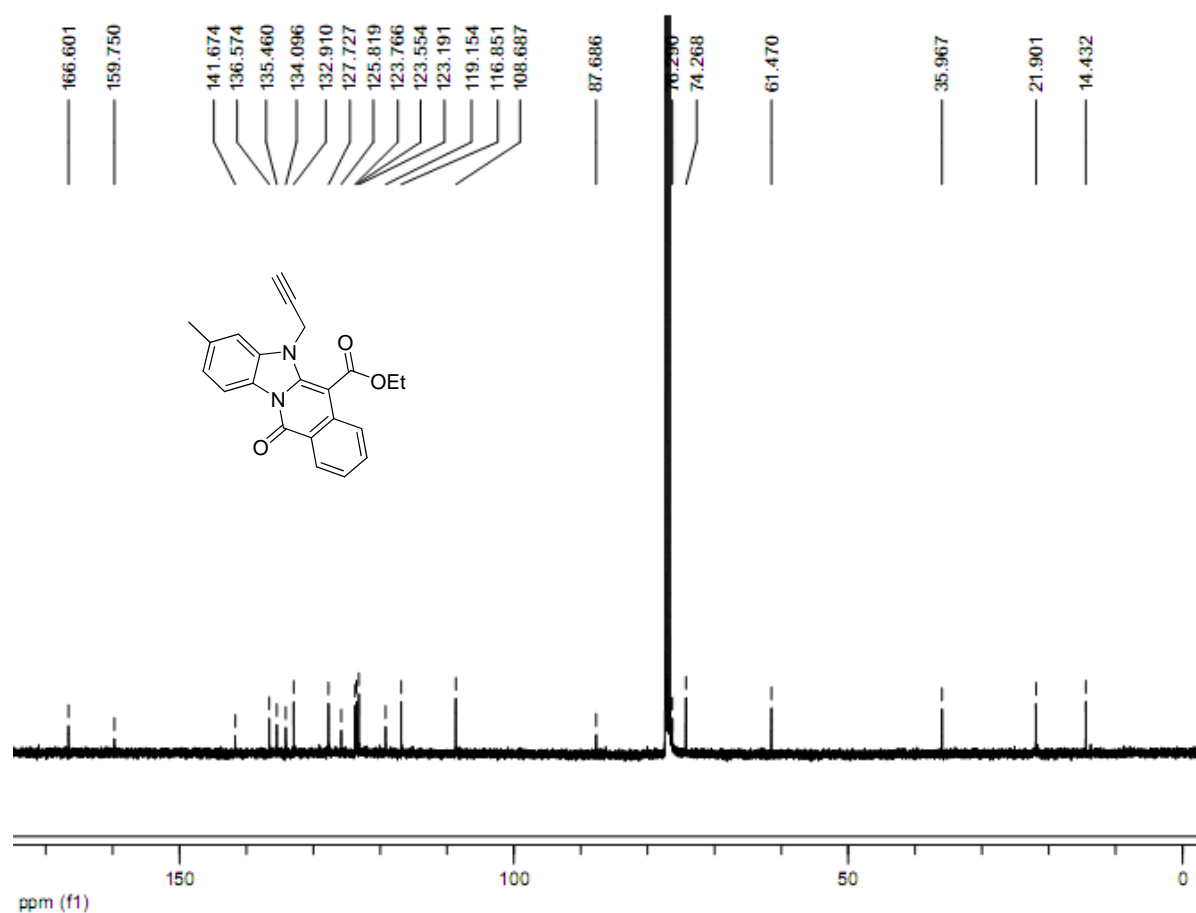

Fig. 78: <sup>13</sup>C NMR spectra of compound **4q** (CDCl<sub>3</sub>, 100 MHz)

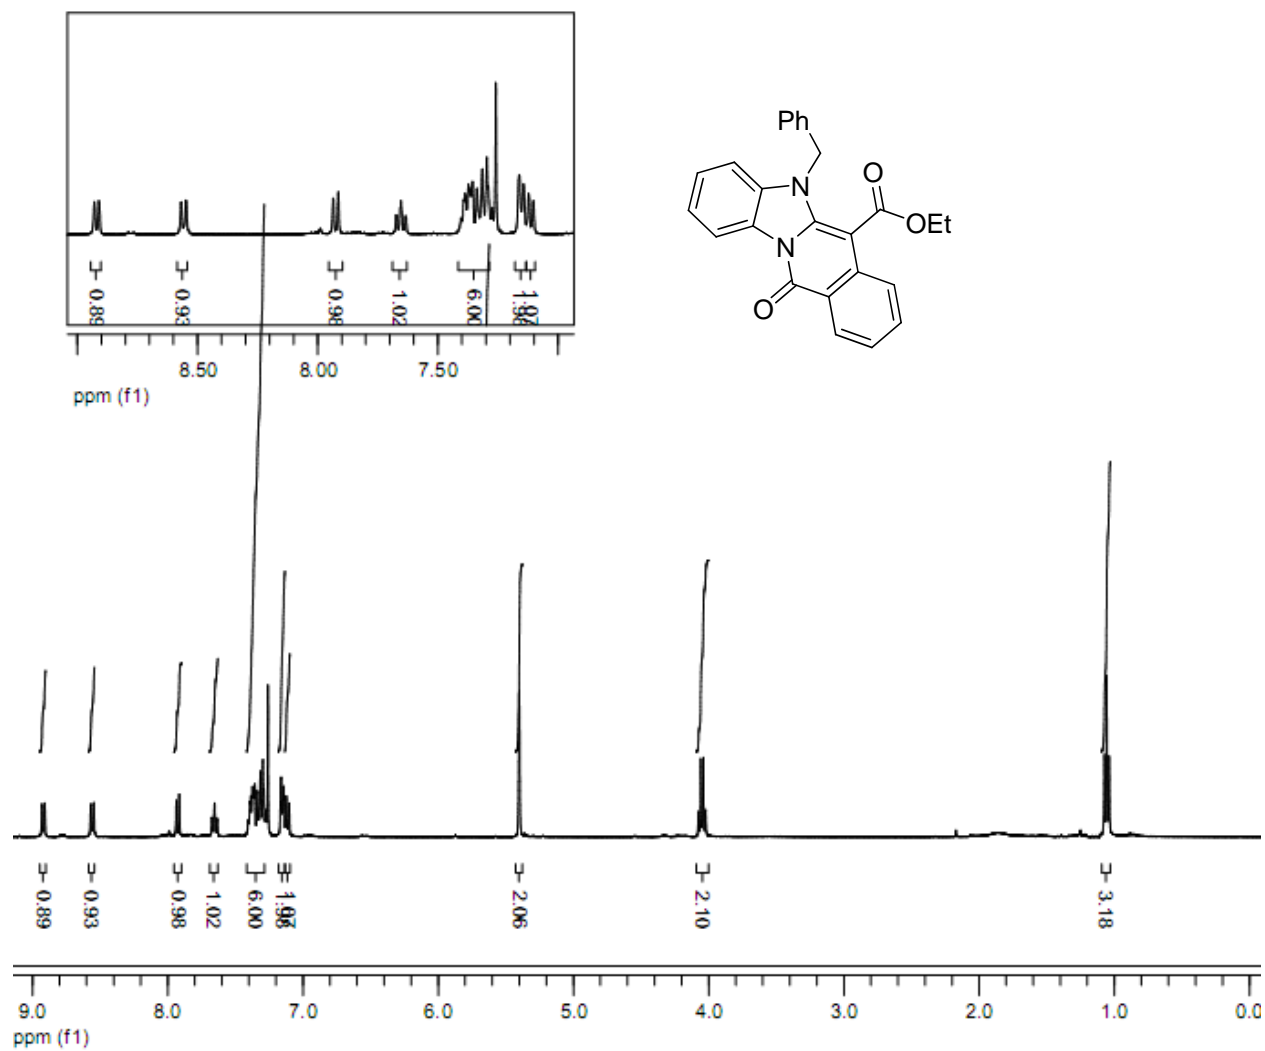

Fig. 79:  $^1\text{H}$  NMR spectra of compound **4r** ( $\text{CDCl}_3$ , 400 MHz)

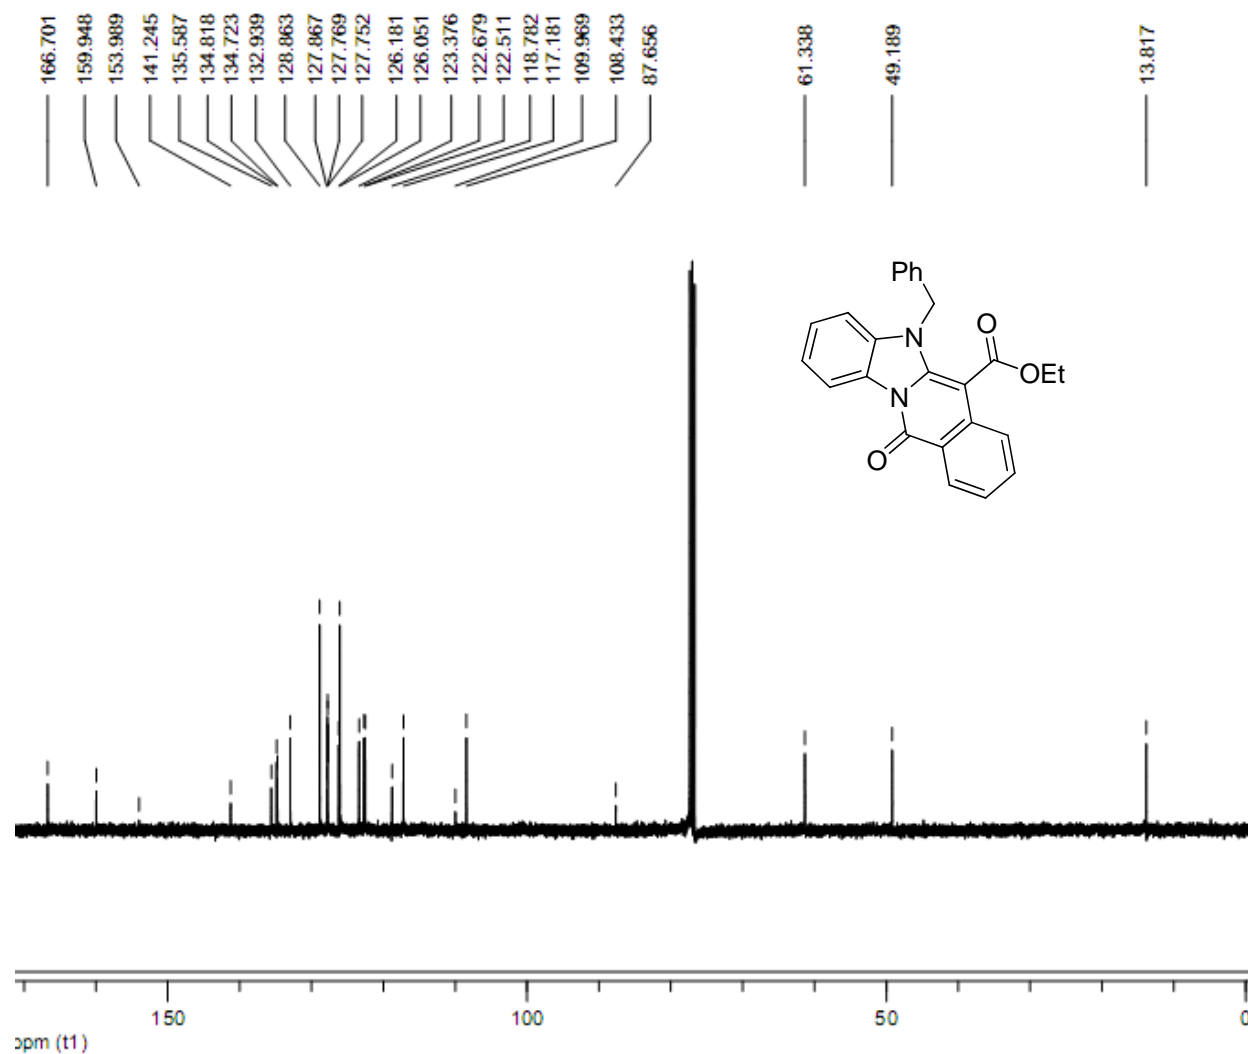

Fig. 80: <sup>13</sup>C NMR spectra of compound **4r** (CDCl<sub>3</sub>, 100 MHz)



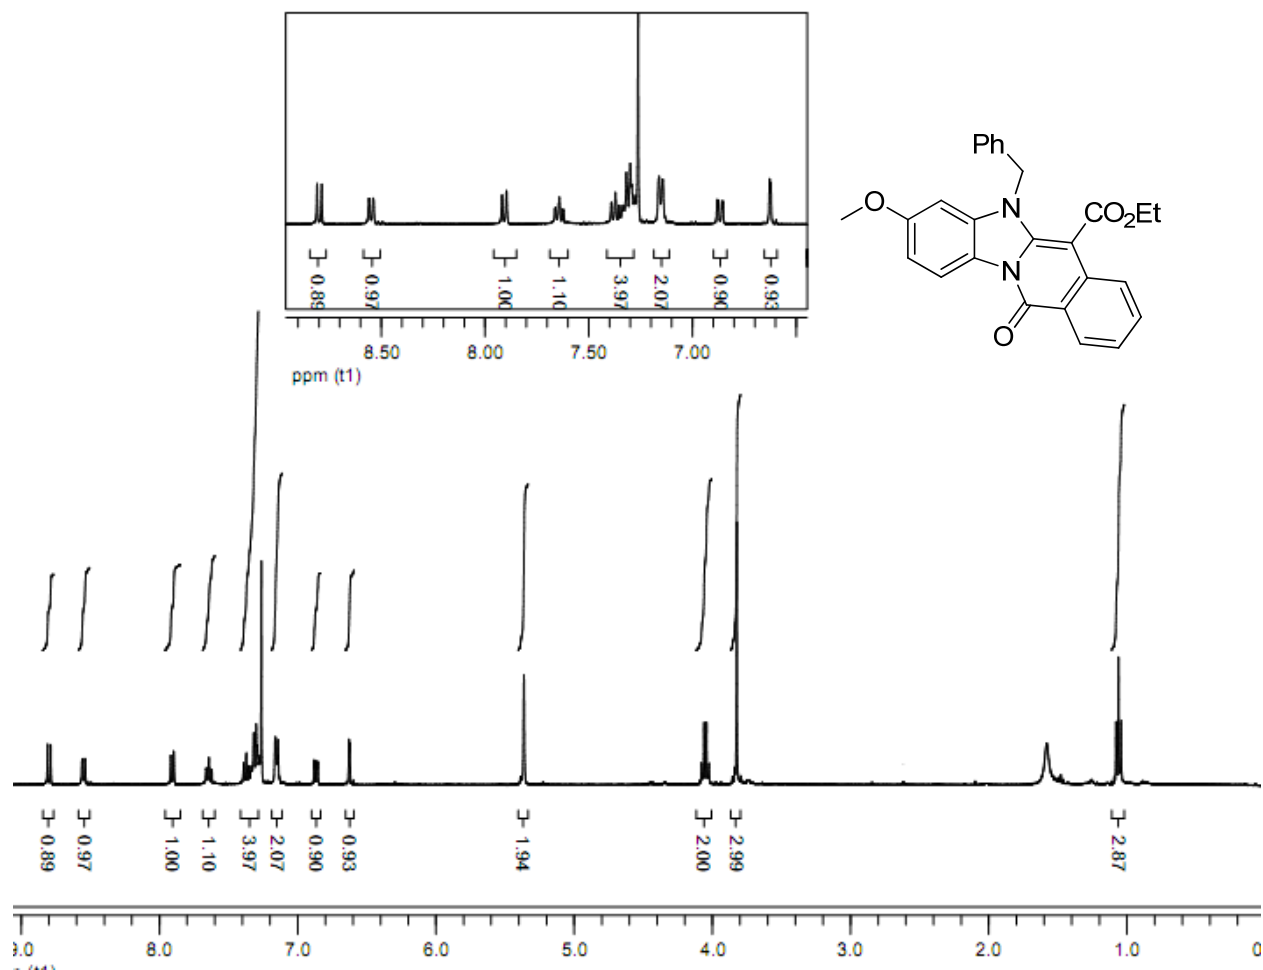

Fig. 81:  $^1\text{H}$  NMR spectra of compound **4s** ( $\text{CDCl}_3$ , 400 MHz)

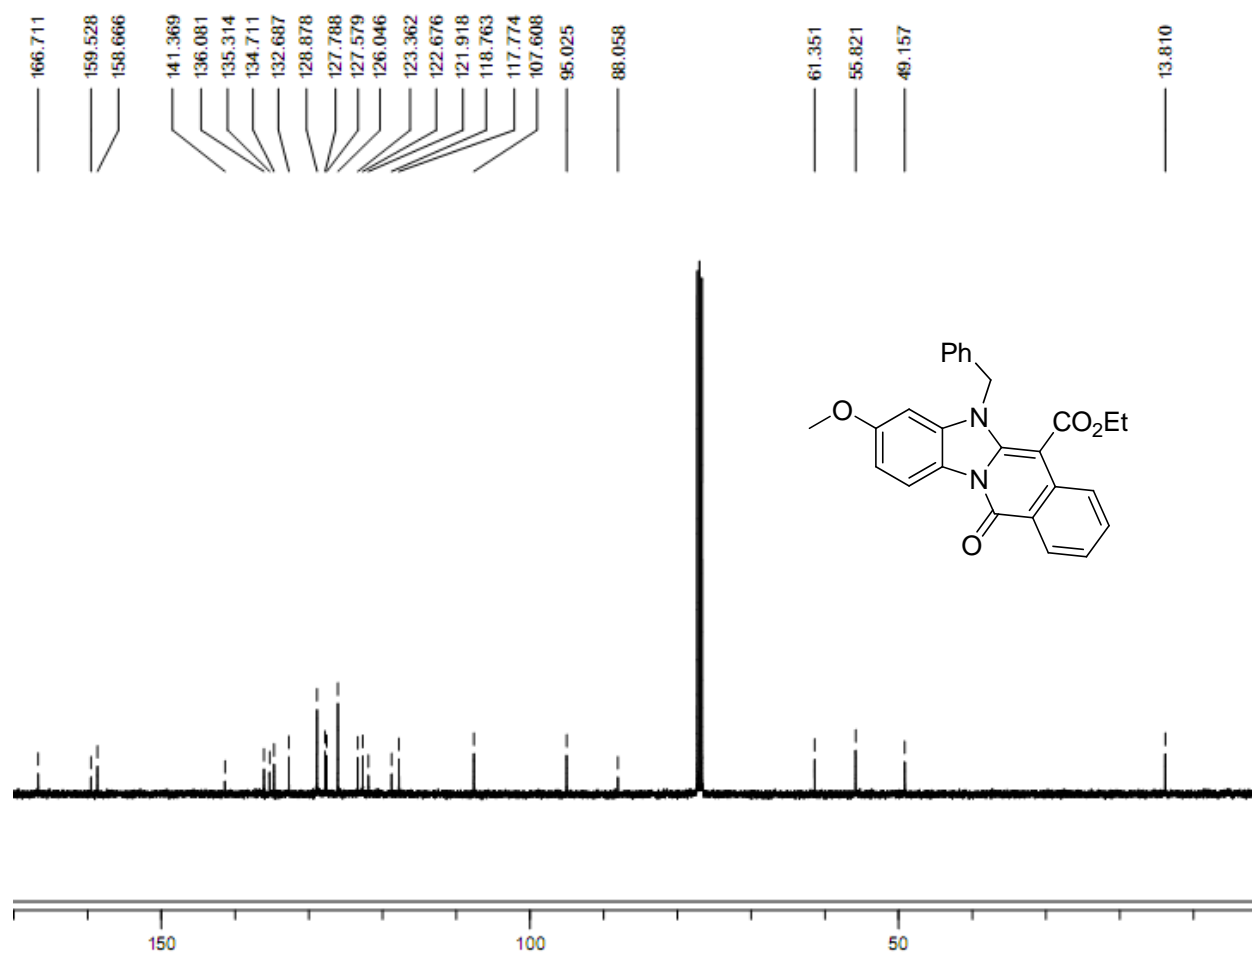

Fig. 82: <sup>13</sup>C NMR spectra of compound **4s** (CDCl<sub>3</sub>, 100 MHz)

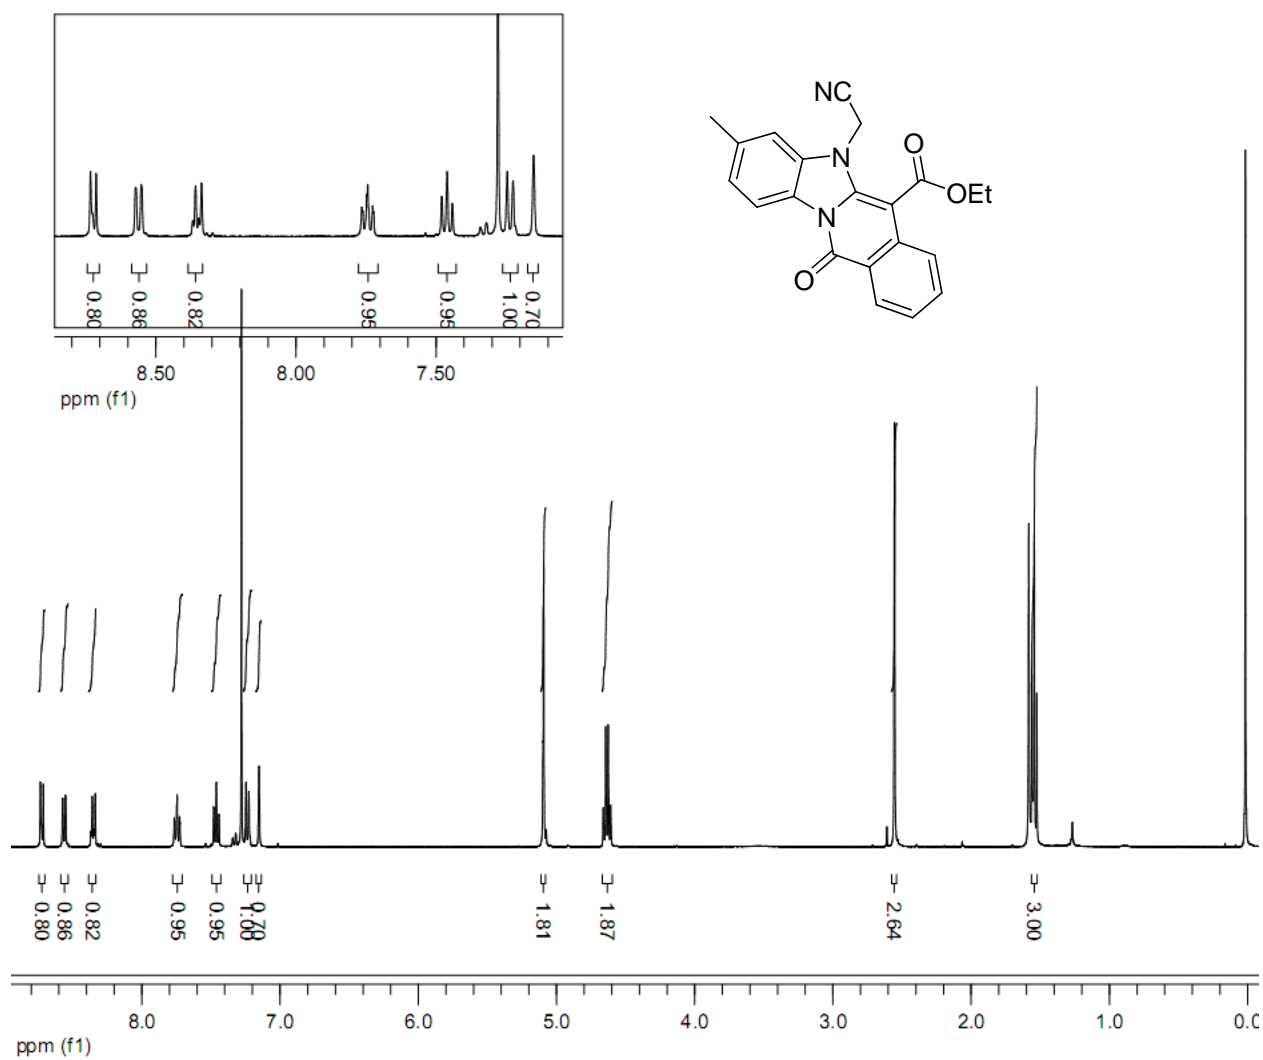

Fig. 83:  $^1\text{H}$  NMR spectra of compound **4t** ( $\text{CDCl}_3$ , 400 MHz)

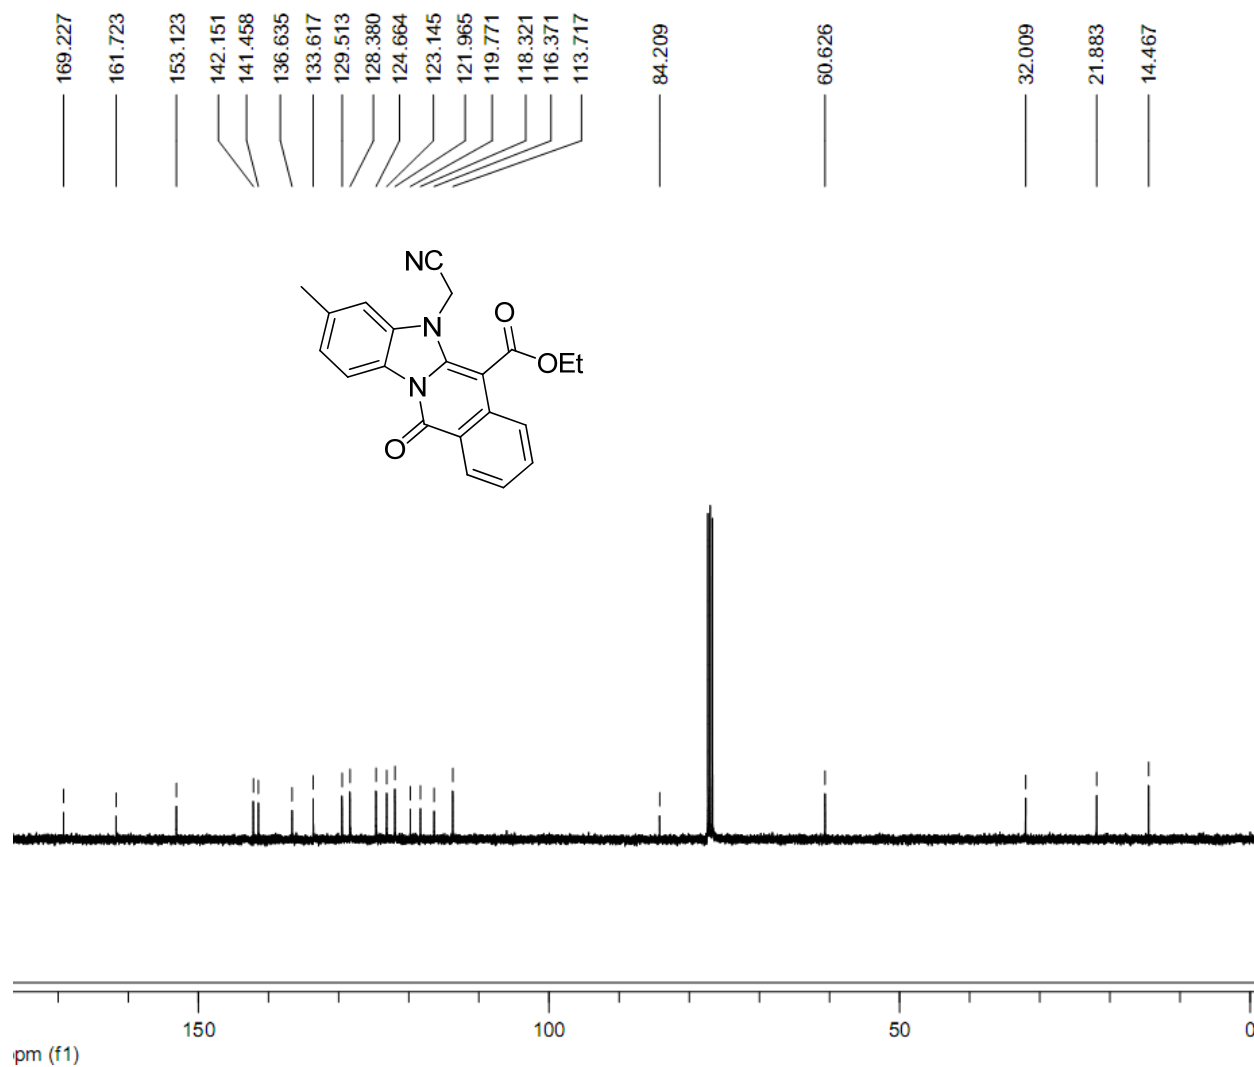

Fig. 84: <sup>13</sup>C NMR spectra of compound **4t** (CDCl<sub>3</sub>, 100 MHz)

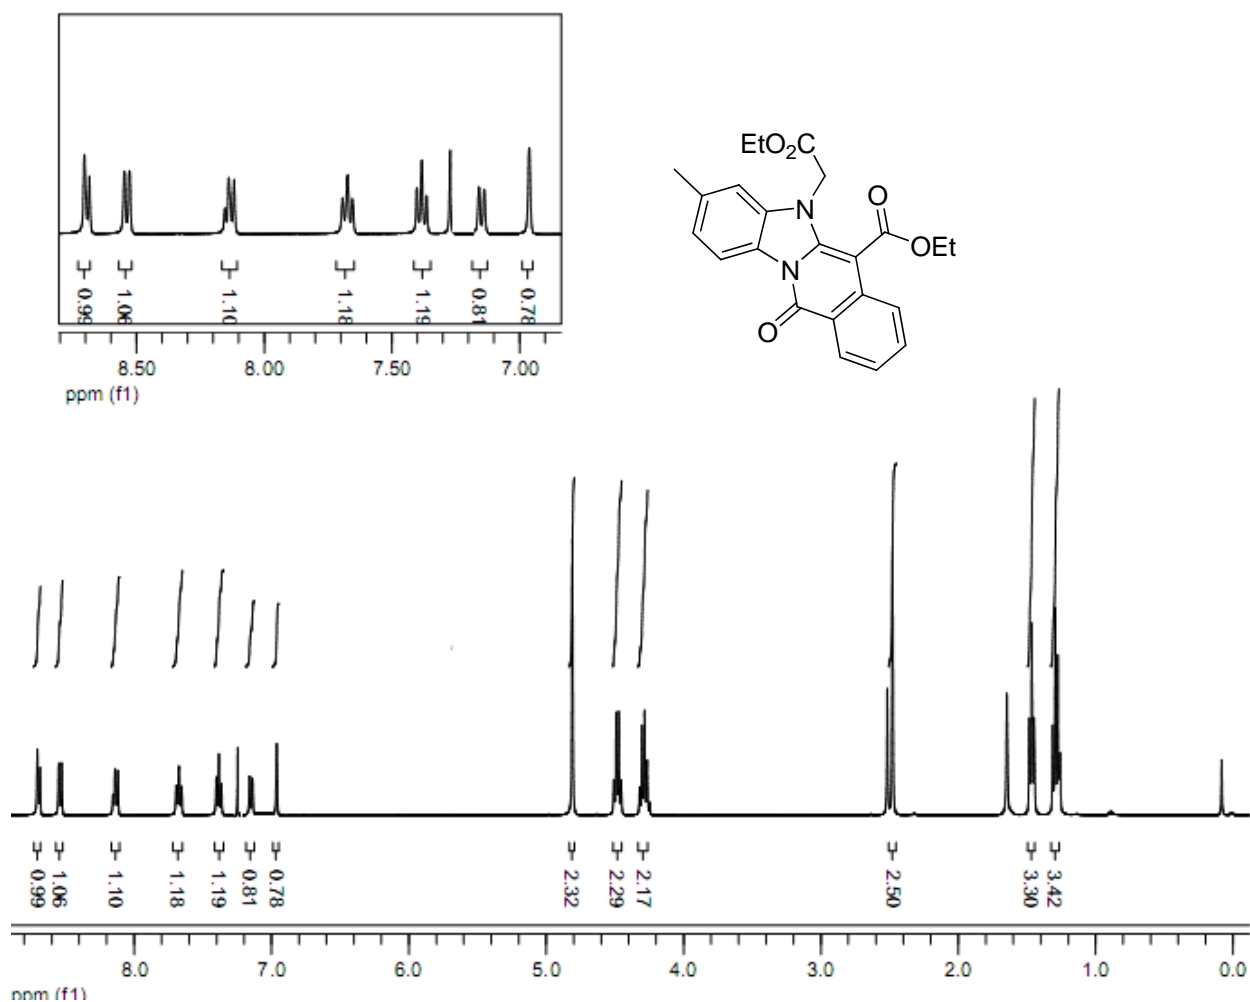

Fig. 85:  $^1\text{H}$  NMR spectra of compound **4u** ( $\text{CDCl}_3$ , 400 MHz)

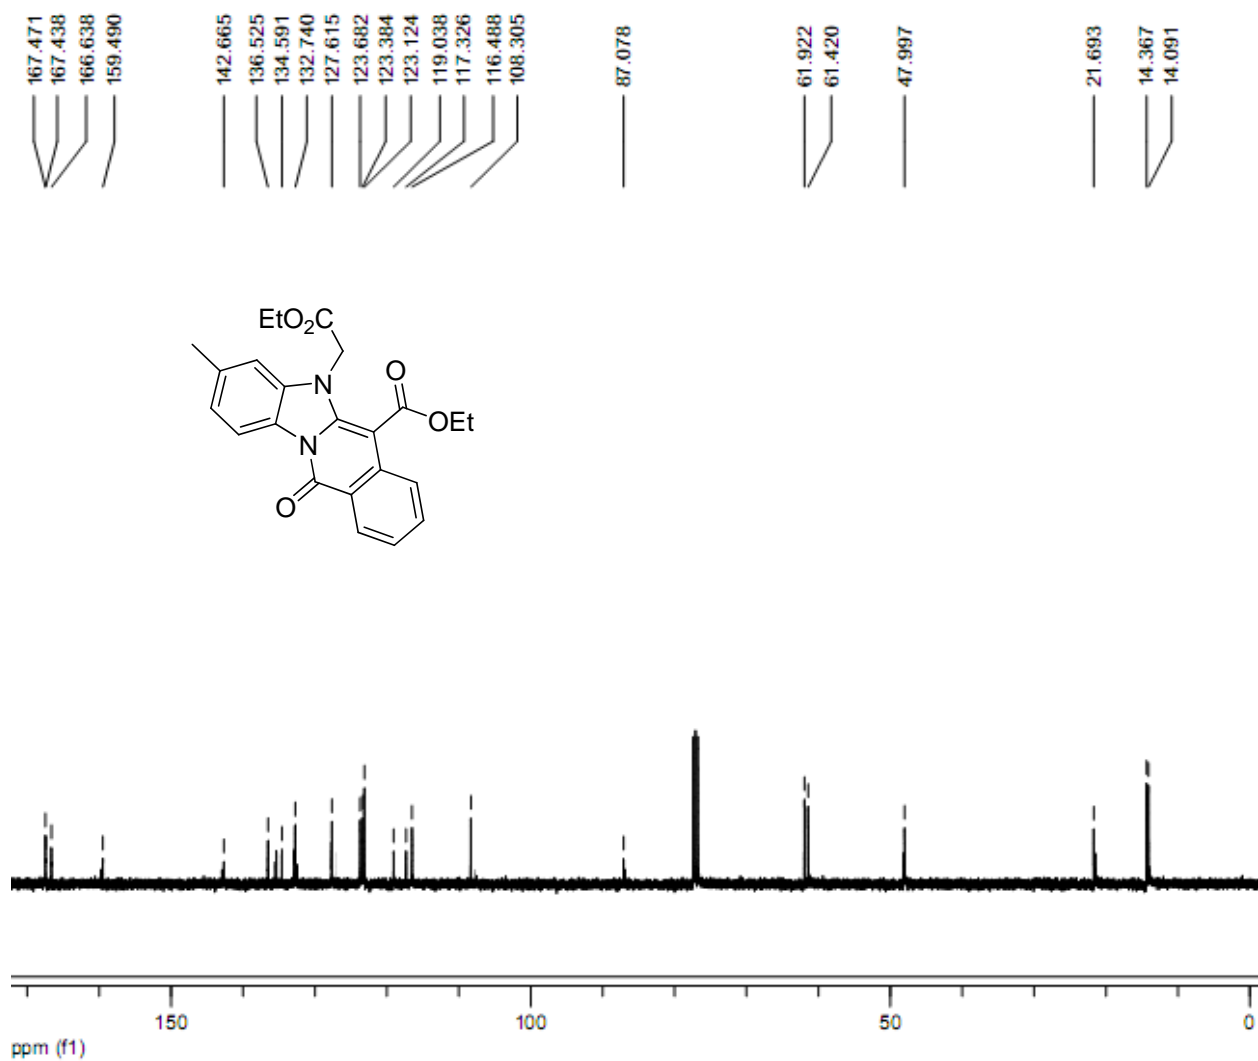

Fig. 86:  $^{13}\text{C}$  NMR spectra of compound **4u** (CDCl<sub>3</sub>, 100 MHz)

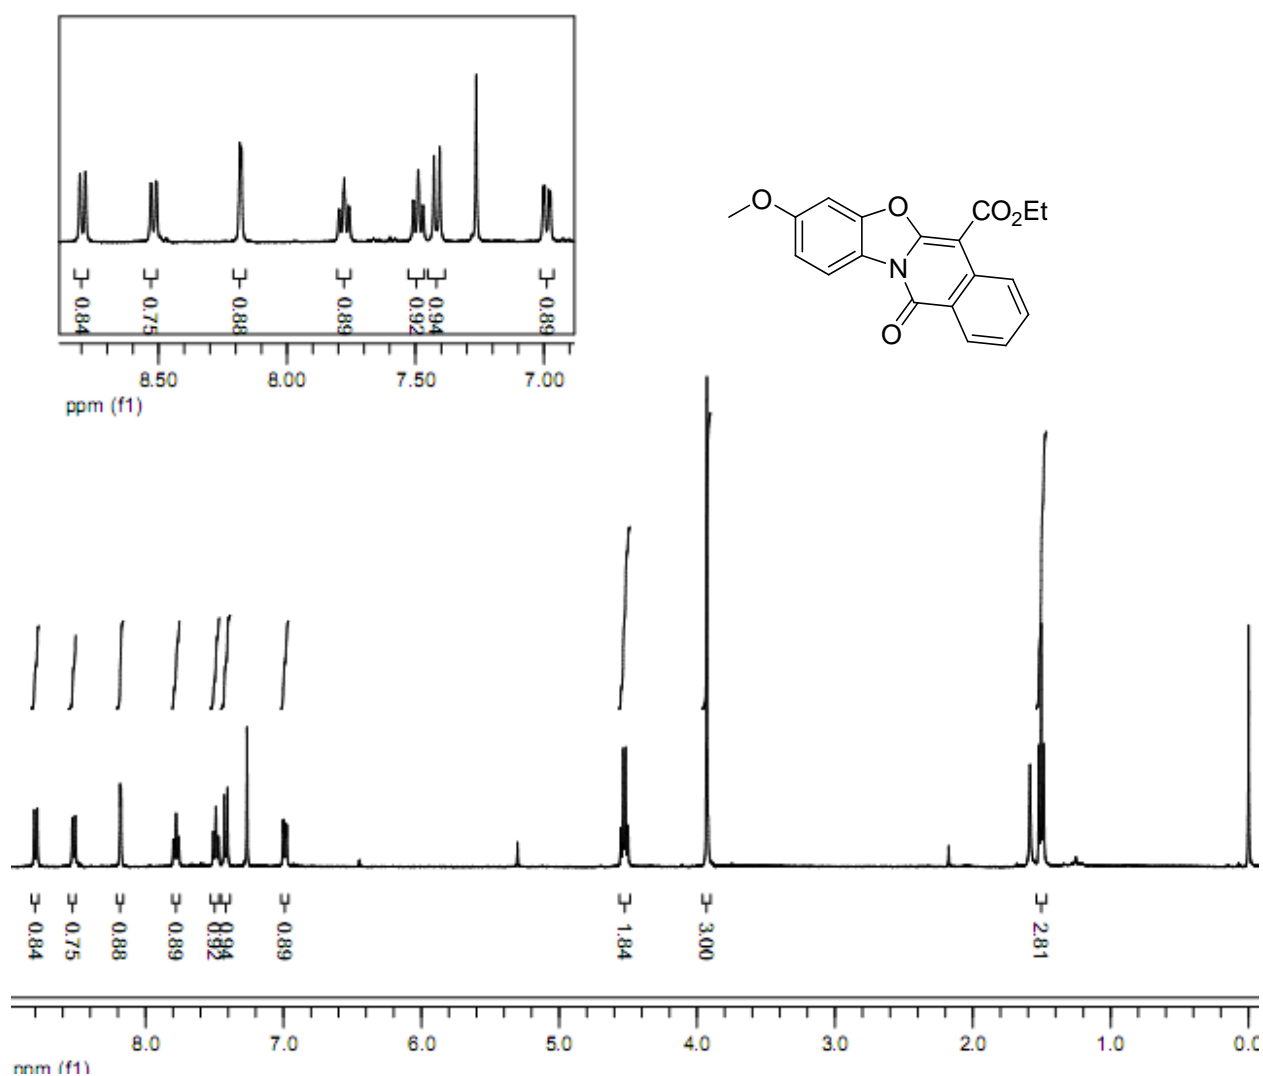

Fig. 87:  $^1\text{H}$  NMR spectra of compound **4v** ( $\text{CDCl}_3$ , 400 MHz)

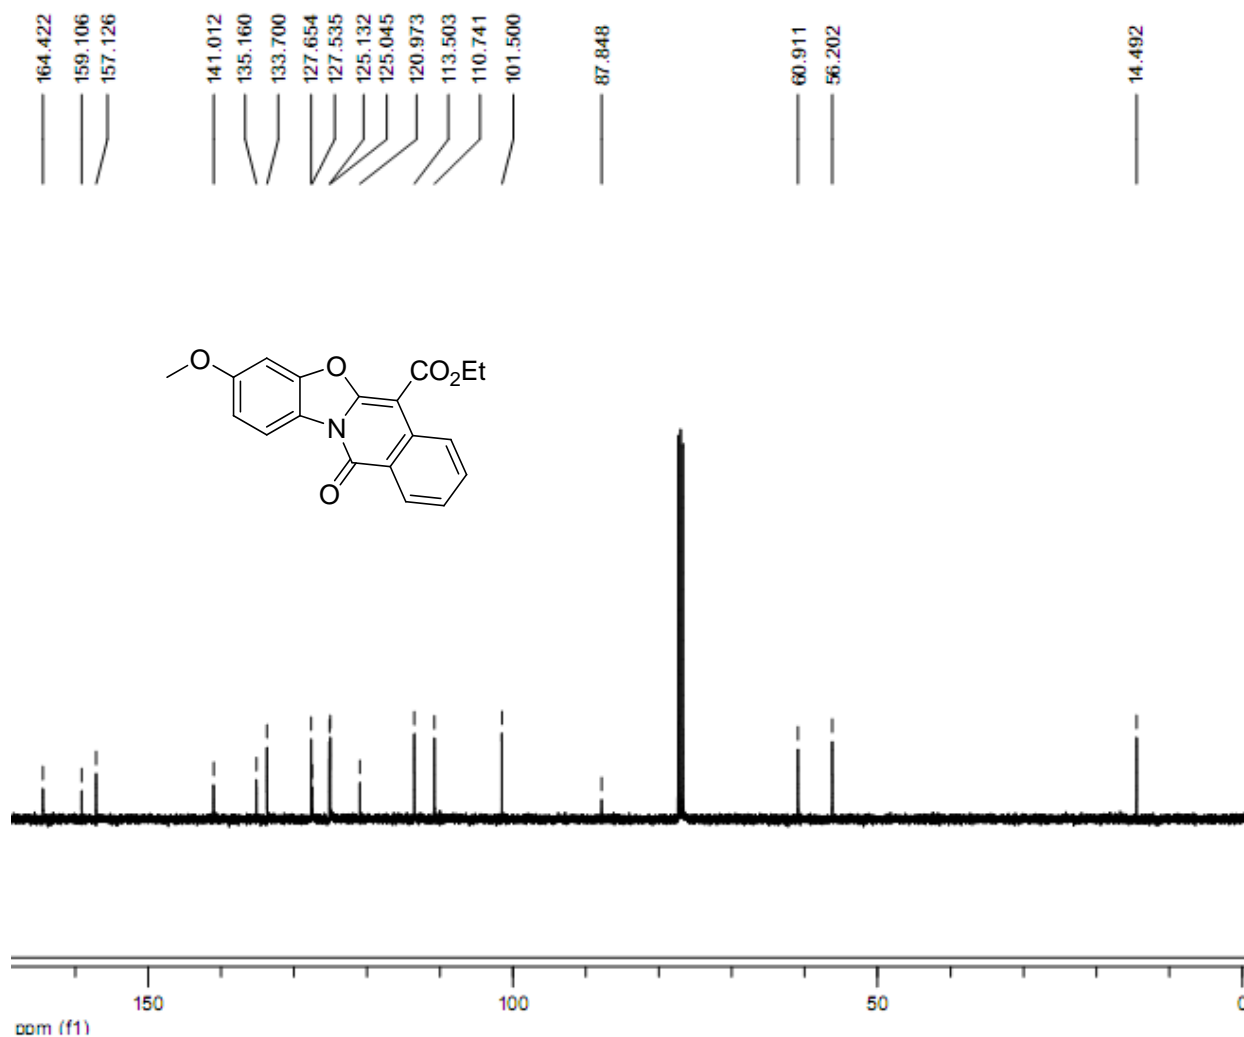

Fig. 88:  $^{13}\text{C}$  NMR spectra of compound **4v** (CDCl<sub>3</sub>, 100 MHz)



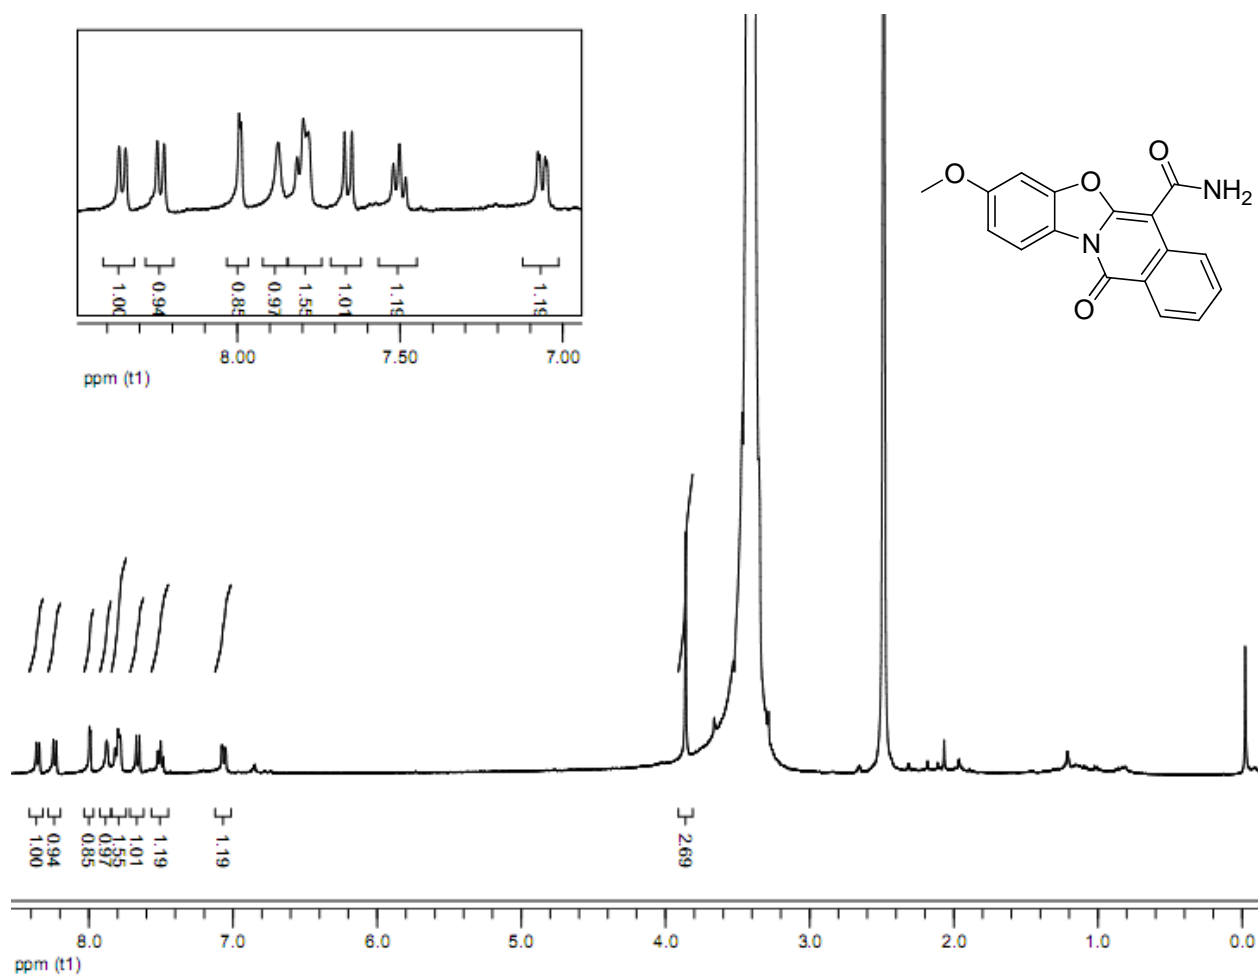

Fig. 89:  $^1\text{H}$  NMR spectra of compound **4w** ( $\text{DMSO-}d_6$ , 400 MHz)

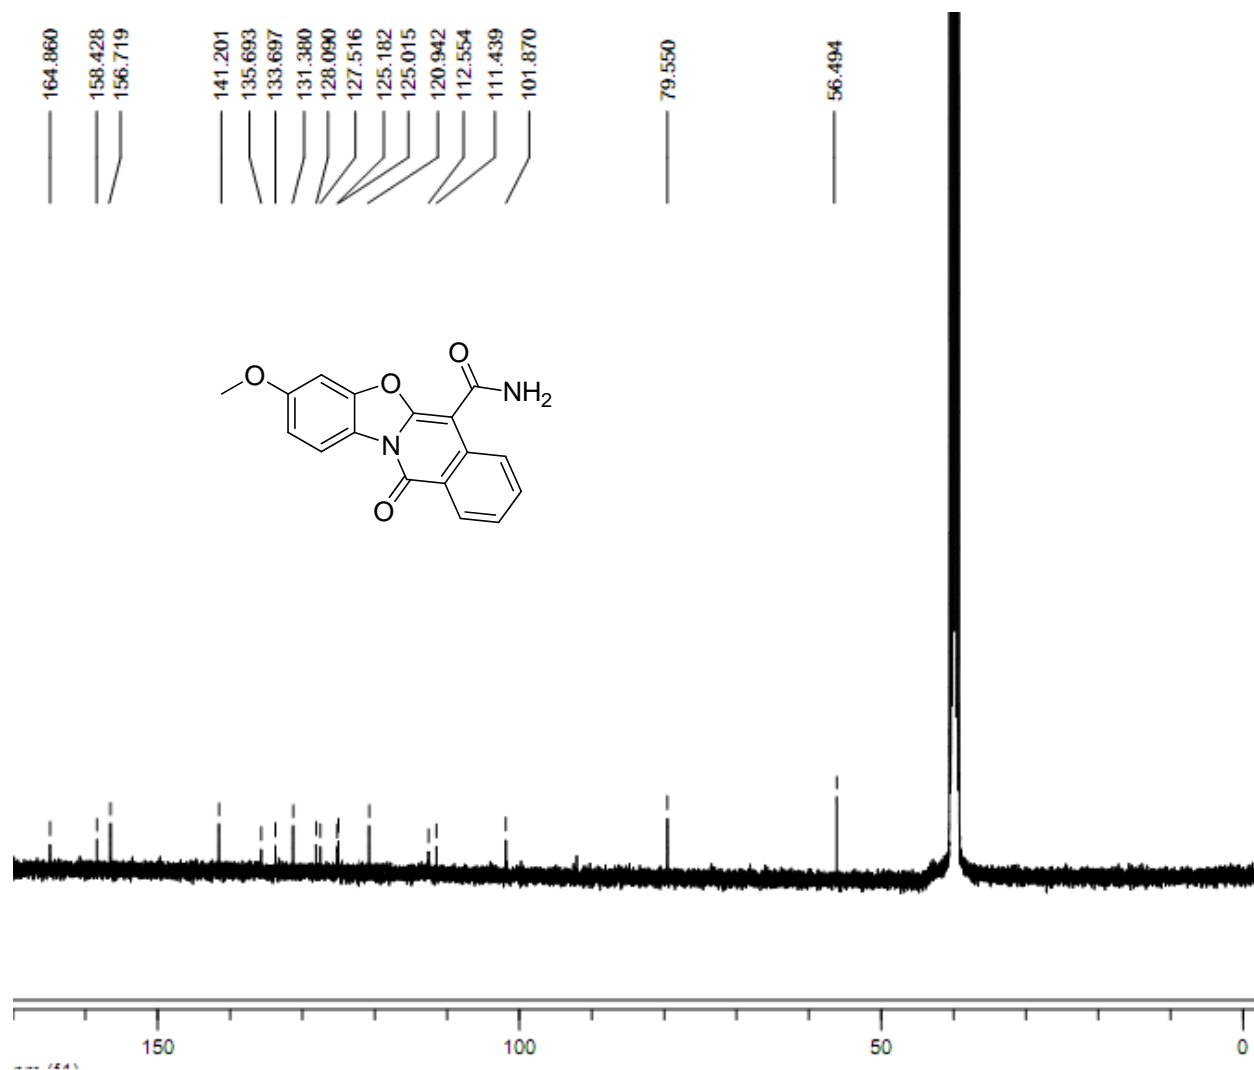

Fig. 90: <sup>13</sup>C NMR spectra of compound **4w** (DMSO-*d*<sub>6</sub>, 100 MHz)

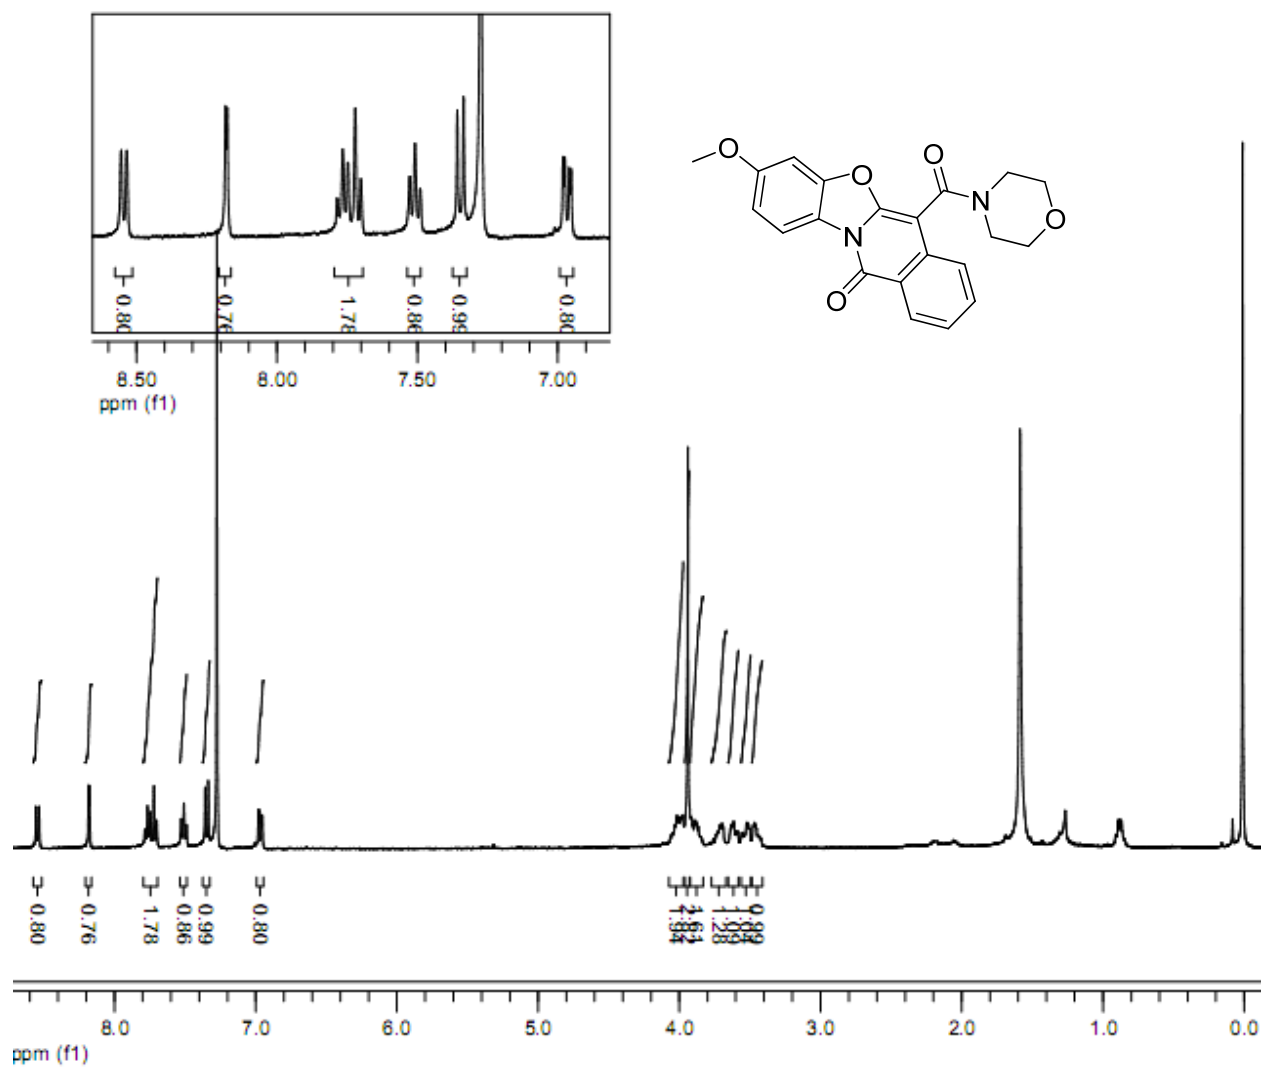

Fig. 91:  $^1\text{H}$  NMR spectra of compound **4x** ( $\text{DMSO-}d_6$ , 400 MHz)

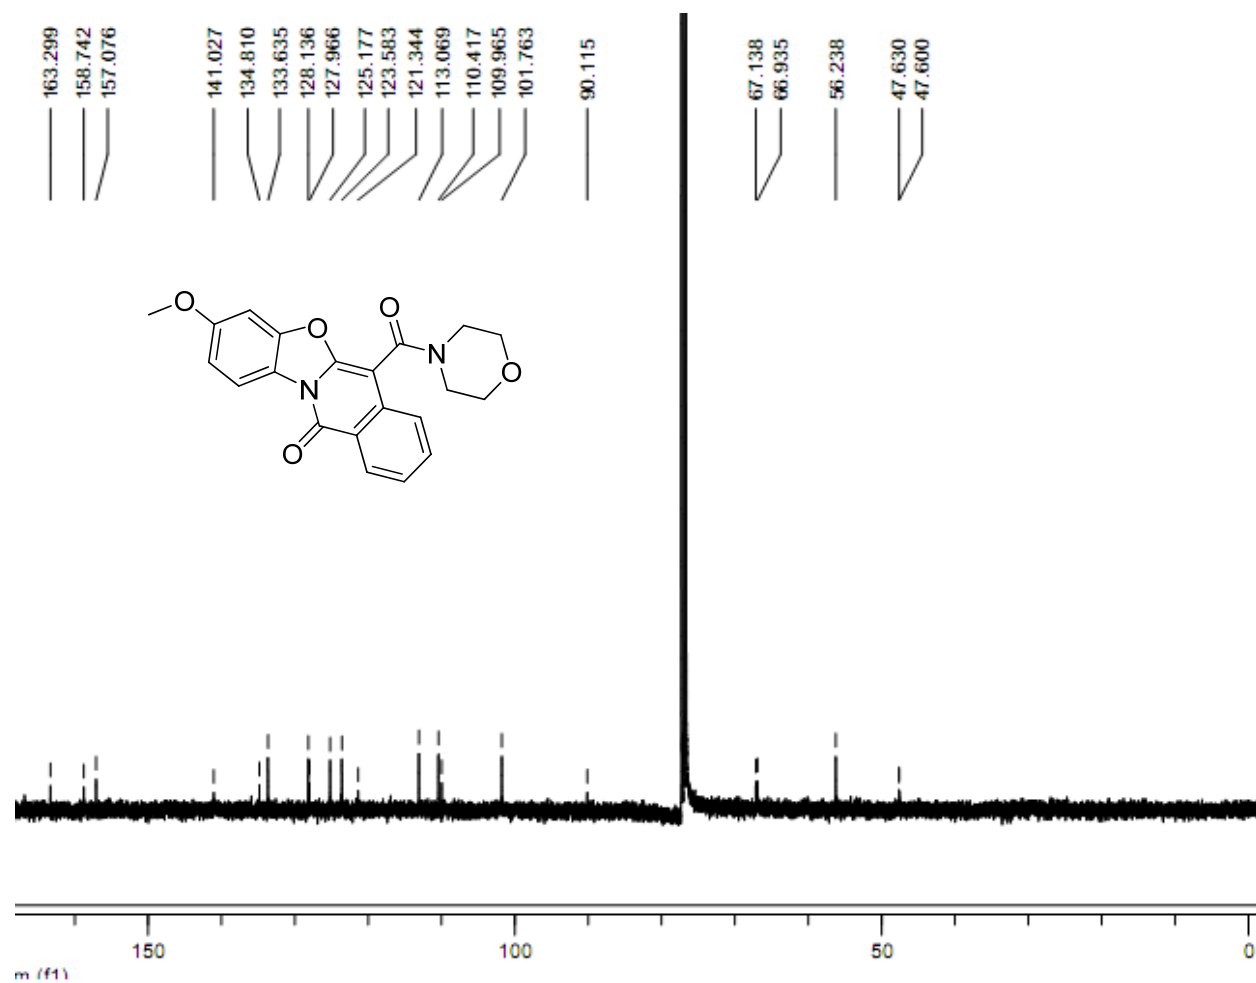

Fig. 92: <sup>13</sup>C NMR spectra of compound **4x** (DMSO-*d*<sub>6</sub>, 100 MHz)

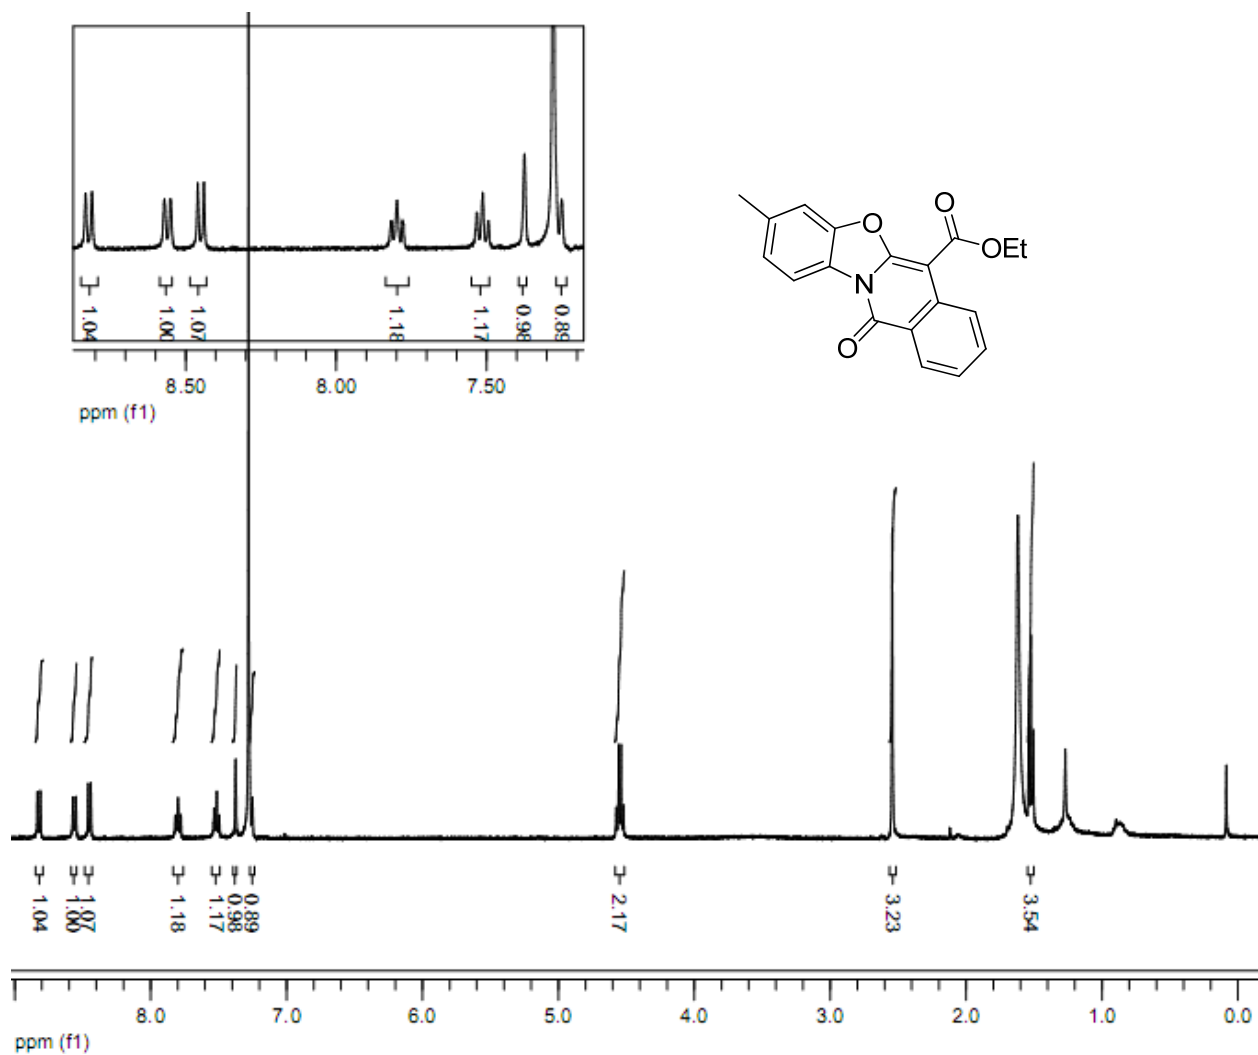

Fig. 93:  $^1\text{H}$  NMR spectra of compound **4y** ( $\text{CDCl}_3$ , 400 MHz)

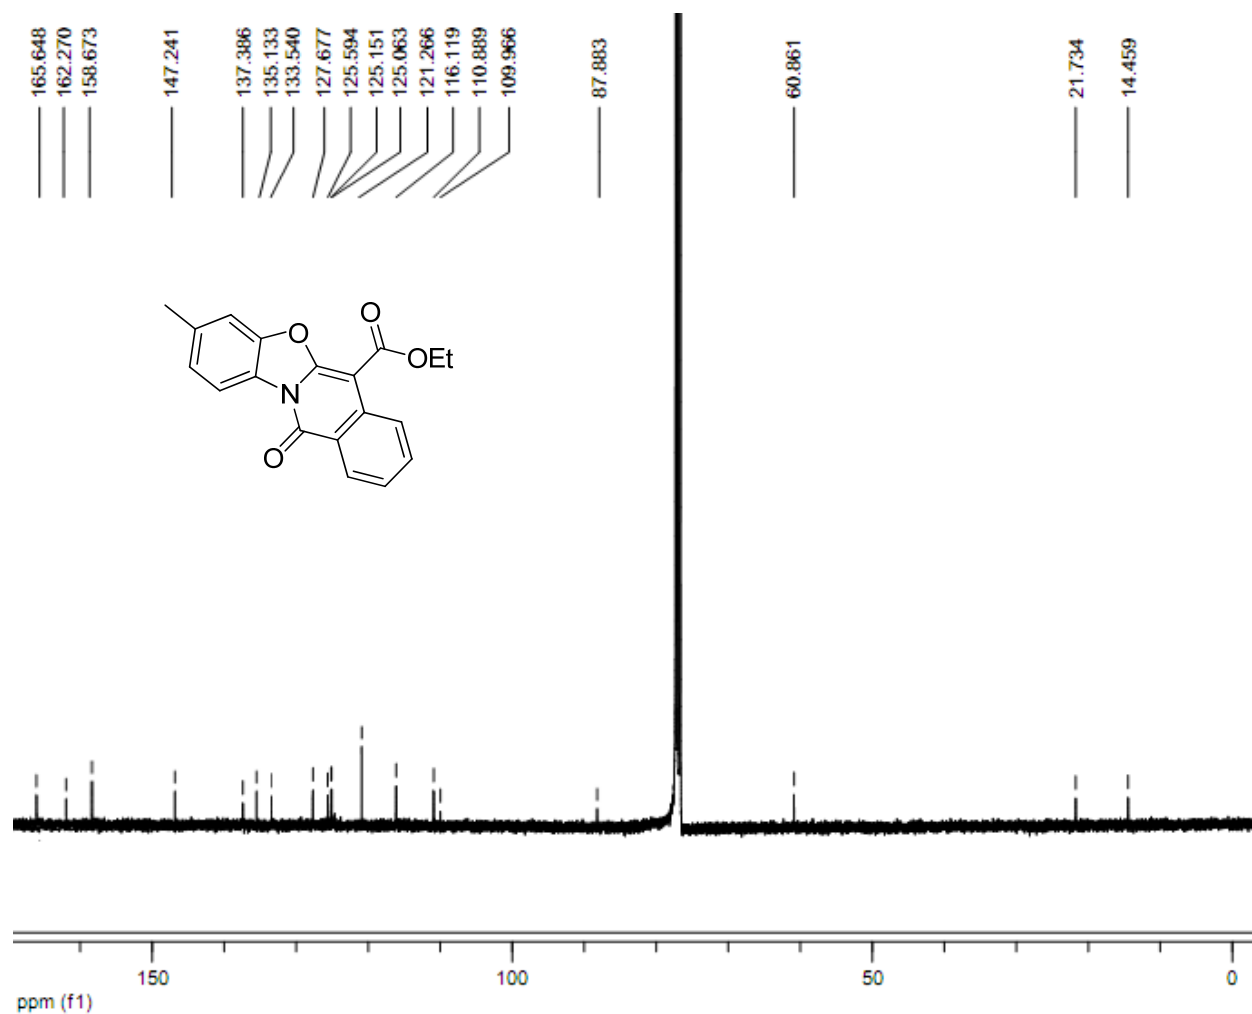

Fig. 94: <sup>13</sup>C NMR spectra of compound **4y** (CDCl<sub>3</sub>, 100 MHz)
